# Supplementary material
Source: publisher figshare collection journal article supplement (https://wiley.figshare.com/ndownloader/files/20160917)
Supplement: Supplementary file 1 [file 20160917]

## Sheet: Input Data
			Part 1 : Enter Information about the Chemical				Part 2: Enter Test Conditions																		Part 4: Enter information on Recalcitrant Reference Chemical						Part 5: Review & Change if Required															Reference		Test data for EMBSI studies (Part 3)
No	Study #	Species	Chemical name	log KOW	SW	Used reference chemicals?	WB	SE(WB)	CD	SE(CD)	FD	SE(FD)	tu	ɸBL	ɸBP	ɸDL	ɸDP	ɸDW	T	COX	SE(COX)	εf	kGD	SE(kGD)	ED,R	SE(ED,R)	kBT,R	SE(kBT,R)	1/ω	SE(1/ω)	log KOC	log KPW	log KNW	EW	GV	χ	θ	COC	CWT	dB	dG	dL	dP	dN	dW			t1	CB,1
				Unitless	g/L		kg		g chemical/kg food		kg food kg body wt-1 d-1		d	kg lipid/kg fish body	kg protein/kg fish body	kg lipid/kg diet	kg protein/kg diet	kg water/kg diet	°C	mg O2/L		Unitless	1/d		Unitless		1/d		1/d		Unitless	Unitless	Unitless	Unitless	L/d	Unitless	Unitless	kg/L	g chemical/L water	g/mL	g/mL	g/mL	g/mL	g/mL	g/mL			day	g/kg ww
1	1	trout	hexachlorobenzene	5.73	6.2e-06	No	0.001	0.0001	0.1	0.002	0.03	0	10	0.028	0.09	0.156	0.55	0.12	13.6	9.7	0.11	NA	0.0456	0.0042							4.29	4.43	4.43	0.56	1.19	0.05	0.05	2e-06	0	1	1	0.9	1.22	1.22	1	Lo et al. 2016		0	0.026
2	1	trout	2,6-dimethyldecane	6.09	0.0001126	No	0.001	0.0001	0.0963	0.00193	0.03	0	10	0.028	0.09	0.156	0.55	0.12	13.6	9.7	0.11	NA	0.0456	0.0042							4.64	4.79	4.79	0.56	1.19	0.05	0.05	2e-06	0	1	1	0.9	1.22	1.22	1	Lo et al. 2016		0	0.0013
3	1	trout	2,3-dimethylheptane	4.61	0.00311	No	0.001	0.0001	0.0789	0.00158	0.03	0	10	0.028	0.09	0.156	0.55	0.12	13.6	9.7	0.11	NA	0.0456	0.0042							3.2	3.31	3.31	0.56	1.19	0.05	0.05	2e-06	0	1	1	0.9	1.22	1.22	1	Lo et al. 2016		0	0.00086
4	1	trout	1-methylphenanthrene	5.08	0.000269	No	0.001	0.0001	0.13	0.0026	0.03	0	10	0.028	0.09	0.156	0.55	0.12	13.6	9.7	0.11	NA	0.0456	0.0042							3.66	3.78	3.78	0.56	1.19	0.05	0.05	2e-06	0	1	1	0.9	1.22	1.22	1	Lo et al. 2016		0	0.00034
5	1	trout	n-dodecane	6.1	3.7e-06	No	0.001	0.0001	0.1	0.002	0.03	0	10	0.028	0.09	0.156	0.55	0.12	13.6	9.7	0.11	NA	0.0456	0.0042							4.65	4.8	4.8	0.56	1.19	0.05	0.05	2e-06	0	1	1	0.9	1.22	1.22	1	Lo et al. 2016		0	0.003
6	1	trout	n-nonane	5.65	0.00022	No	0.001	0.0001	0.0881	0.00176	0.03	0	10	0.028	0.09	0.156	0.55	0.12	13.6	9.7	0.11	NA	0.0456	0.0042							4.21	4.35	4.35	0.56	1.19	0.05	0.05	2e-06	0	1	1	0.9	1.22	1.22	1	Lo et al. 2016		0	0.00064
7	1	trout	phenanthrene	4.46	0.00115	No	0.001	0.0001	0.105	0.0021	0.03	0	10	0.028	0.09	0.156	0.55	0.12	13.6	9.7	0.11	NA	0.0456	0.0042							3.06	3.16	3.16	0.56	1.19	0.05	0.05	2e-06	0	1	1	0.9	1.22	1.22	1	Lo et al. 2016		0	0.0013
8	1	trout	2,2,4,6,6-pentamethylheptane	5.94	0.0001508	No	0.001	0.0001	0.0937	0.00187	0.03	0	10	0.028	0.09	0.156	0.55	0.12	13.6	9.7	0.11	NA	0.0456	0.0042							4.49	4.64	4.64	0.56	1.19	0.05	0.05	2e-06	0	1	1	0.9	1.22	1.22	1	Lo et al. 2016		0	0.0034
9	1	trout	trans-decalin	4.79	0.000889	No	0.001	0.0001	0.1	0.002	0.03	0	10	0.028	0.09	0.156	0.55	0.12	13.6	9.7	0.11	NA	0.0456	0.0042							3.38	3.49	3.49	0.56	1.19	0.05	0.05	2e-06	0	1	1	0.9	1.22	1.22	1	Lo et al. 2016		0	0.013
10	1	trout	1,3,5-trimethylbenzene	3.42	0.0482	No	0.001	0.0001	0.101	0.00202	0.03	0	10	0.028	0.09	0.156	0.55	0.12	13.6	9.7	0.11	NA	0.0456	0.0042							2.05	2.12	2.12	0.54	1.19	0.05	0.05	2e-06	0	1	1	0.9	1.22	1.22	1	Lo et al. 2016		0	0.00028
11	1	trout	1,3,5-trimethylcyclohexane	4.43	0.004564	No	0.001	0.0001	0.0801	0.0016	0.03	0	10	0.028	0.09	0.156	0.55	0.12	13.6	9.7	0.11	NA	0.0456	0.0042							3.03	3.13	3.13	0.56	1.19	0.05	0.05	2e-06	0	1	1	0.9	1.22	1.22	1	Lo et al. 2016		0	0.0011
12	2	trout	hexachlorobenzene	5.73	6.2e-06	No	0.0023	0.0003	0.0265	0.00053	0.03	0	13	0.0477	0.09	0.156	0.55	0.12	13.6	9.7	0.11	NA	0.0326	0.0023							4.29	4.43	4.43	0.56	2.2	0.05	0.05	2e-06	0	1	1	0.9	1.22	1.22	1	Lo et al. 2016		0	0.0057
13	2	trout	3,5,5-trimethylcyclohexene	4.25	0.006606	No	0.0023	0.0003	0.0858	0.00172	0.03	0	13	0.0477	0.09	0.156	0.55	0.12	13.6	9.7	0.11	NA	0.0326	0.0023							2.85	2.95	2.95	0.56	2.2	0.05	0.05	2e-06	0	1	1	0.9	1.22	1.22	1	Lo et al. 2016		0	0.0029
14	2	trout	2,4,6-trimethyl-3-heptene	4.95	0.001447	No	0.0023	0.0003	0.0784	0.00157	0.03	0	13	0.0477	0.09	0.156	0.55	0.12	13.6	9.7	0.11	NA	0.0326	0.0023							3.53	3.65	3.65	0.56	2.2	0.05	0.05	2e-06	0	1	1	0.9	1.22	1.22	1	Lo et al. 2016		0	0.005
15	2	trout	cis-1,1,3,5-tetramethylcyclohexane	4.88	0.001643	No	0.0023	0.0003	0.0866	0.00173	0.03	0	13	0.0477	0.09	0.156	0.55	0.12	13.6	9.7	0.11	NA	0.0326	0.0023							3.46	3.58	3.58	0.56	2.2	0.05	0.05	2e-06	0	1	1	0.9	1.22	1.22	1	Lo et al. 2016		0	0.01
16	2	trout	1-decene	5.7	0.0003288	No	0.0023	0.0003	0.0912	0.00182	0.03	0	13	0.0477	0.09	0.156	0.55	0.12	13.6	9.7	0.11	NA	0.0326	0.0023							4.26	4.4	4.4	0.56	2.2	0.05	0.05	2e-06	0	1	1	0.9	1.22	1.22	1	Lo et al. 2016		0	0.0044
17	2	trout	iso-butylcyclohexane	4.99	0.001321	No	0.0023	0.0003	0.0908	0.00182	0.03	0	13	0.0477	0.09	0.156	0.55	0.12	13.6	9.7	0.11	NA	0.0326	0.0023							3.57	3.69	3.69	0.56	2.2	0.05	0.05	2e-06	0	1	1	0.9	1.22	1.22	1	Lo et al. 2016		0	0.0088
18	2	trout	cis-bicyclo(4.3.0)nonane	3.71	0.01925	No	0.0023	0.0003	0.0955	0.00191	0.03	0	13	0.0477	0.09	0.156	0.55	0.12	13.6	9.7	0.11	NA	0.0326	0.0023							2.33	2.41	2.41	0.55	2.2	0.05	0.05	2e-06	0	1	1	0.9	1.22	1.22	1	Lo et al. 2016		0	0.0042
19	2	trout	2,2,4,6,6-pentamethyl-3-heptene	5.85	0.0001823	No	0.0023	0.0003	0.106	0.00212	0.03	0	13	0.0477	0.09	0.156	0.55	0.12	13.6	9.7	0.11	NA	0.0326	0.0023							4.4	4.55	4.55	0.56	2.2	0.05	0.05	2e-06	0	1	1	0.9	1.22	1.22	1	Lo et al. 2016		0	0.0049
20	2	trout	1-tert-butyl-4-methylbenzene	5.17	0.002969	No	0.0023	0.0003	0.102	0.00204	0.03	0	13	0.0477	0.09	0.156	0.55	0.12	13.6	9.7	0.11	NA	0.0326	0.0023							3.74	3.87	3.87	0.56	2.2	0.05	0.05	2e-06	0	1	1	0.9	1.22	1.22	1	Lo et al. 2016		0	0.0039
21	2	trout	1,2,3,4-tetramethylbenzene	4	0.03394	No	0.0023	0.0003	0.0981	0.00196	0.03	0	13	0.0477	0.09	0.156	0.55	0.12	13.6	9.7	0.11	NA	0.0326	0.0023							2.61	2.7	2.7	0.56	2.2	0.05	0.05	2e-06	0	1	1	0.9	1.22	1.22	1	Lo et al. 2016		0	0.0024
22	2	trout	1-dodecene	6.1	0.0001127	No	0.0023	0.0003	0.0882	0.00176	0.03	0	13	0.0477	0.09	0.156	0.55	0.12	13.6	9.7	0.11	NA	0.0326	0.0023							4.65	4.8	4.8	0.56	2.2	0.05	0.05	2e-06	0	1	1	0.9	1.22	1.22	1	Lo et al. 2016		0	0.0045
23	2	trout	1,4-dimethyl-1,2,3,4-tetrahydronaphthalene	4.79	0.005511	No	0.0023	0.0003	0.106	0.00212	0.03	0	13	0.0477	0.09	0.156	0.55	0.12	13.6	9.7	0.11	NA	0.0326	0.0023							3.38	3.49	3.49	0.56	2.2	0.05	0.05	2e-06	0	1	1	0.9	1.22	1.22	1	Lo et al. 2016		0	0.0059
24	2	trout	1-hexadecene	8.06	1.232e-06	No	0.0023	0.0003	0.0962	0.00192	0.03	0	13	0.0477	0.09	0.156	0.55	0.12	13.6	9.7	0.11	NA	0.0326	0.0023							6.55	6.76	6.76	0.56	2.2	0.05	0.05	2e-06	0	1	1	0.9	1.22	1.22	1	Lo et al. 2016		0	0.011
25	3	trout	hexachlorobenzene	5.73	6.2e-06	No	0.00088	5e-05	0.00796	0.000159	0.03	0	10	0.0239	0.09	0.156	0.55	0.12	13.6	9.7	0.11	NA	0.0394	0.0033							4.29	4.43	4.43	0.56	1.08	0.05	0.05	2e-06	0	1	1	0.9	1.22	1.22	1	Lo et al. 2016		0	0.00069
26	3	trout	naphthalene	3.3	0.031	No	0.00088	5e-05	0.114	0.00228	0.03	0	10	0.0239	0.09	0.156	0.55	0.12	13.6	9.7	0.11	NA	0.0394	0.0033							1.93	2	2	0.54	1.08	0.05	0.05	2e-06	0	1	1	0.9	1.22	1.22	1	Lo et al. 2016		0	3.7e-05
27	3	trout	2-methylnaphthalene	3.86	0.0246	No	0.00088	5e-05	0.0975	0.00195	0.03	0	10	0.0239	0.09	0.156	0.55	0.12	13.6	9.7	0.11	NA	0.0394	0.0033							2.47	2.56	2.56	0.56	1.08	0.05	0.05	2e-06	0	1	1	0.9	1.22	1.22	1	Lo et al. 2016		0	5.3e-05
28	3	trout	2,3-dimethylnaphthalene	4.4	0.00199	No	0.00088	5e-05	0.0968	0.00194	0.03	0	10	0.0239	0.09	0.156	0.55	0.12	13.6	9.7	0.11	NA	0.0394	0.0033							3	3.1	3.1	0.56	1.08	0.05	0.05	2e-06	0	1	1	0.9	1.22	1.22	1	Lo et al. 2016		0	9.8e-05
29	3	trout	deuterated n-hexadecane	8.2	9.193e-07	No	0.00088	5e-05	0.115	0.0023	0.03	0	10	0.0239	0.09	0.156	0.55	0.12	13.6	9.7	0.11	NA	0.0394	0.0033							6.68	6.9	6.9	0.56	1.08	0.05	0.05	2e-06	0	1	1	0.9	1.22	1.22	1	Lo et al. 2016		0	0.0037
30	3	trout	anthracene	4.45	4.34e-05	No	0.00088	5e-05	0.109	0.00218	0.03	0	10	0.0239	0.09	0.156	0.55	0.12	13.6	9.7	0.11	NA	0.0394	0.0033							3.05	3.15	3.15	0.56	1.08	0.05	0.05	2e-06	0	1	1	0.9	1.22	1.22	1	Lo et al. 2016		0	4.5e-05
31	3	trout	benzo[a]pyrene	6.13	1.62e-06	No	0.00088	5e-05	0.0945	0.00189	0.03	0	10	0.0239	0.09	0.156	0.55	0.12	13.6	9.7	0.11	NA	0.0394	0.0033							4.68	4.83	4.83	0.56	1.08	0.05	0.05	2e-06	0	1	1	0.9	1.22	1.22	1	Lo et al. 2016		0	1.05e-05
32	3	trout	dibenz[a,h]anthracene	6.75	2.49e-06	No	0.00088	5e-05	0.0887	0.00177	0.03	0	10	0.0239	0.09	0.156	0.55	0.12	13.6	9.7	0.11	NA	0.0394	0.0033							5.28	5.45	5.45	0.56	1.08	0.05	0.05	2e-06	0	1	1	0.9	1.22	1.22	1	Lo et al. 2016		0	1.05e-05
33	4	trout	isodecanol (low concentration)	3.57	0.2027	No	0.001022	3.7e-05	0.495	0.0099	0.03	0	14	0.03	0.09	0.156	0.55	0.12	14.1	9.1	0.11	NA	0.0518	0.0048							2.19	2.27	2.27	0.55	1.29	0.05	0.05	2e-06	0	1	1	0.9	1.22	1.22	1	Unpublished EMBSI study		0	0.000396
34	4	trout	isodecanol (high concentration)	3.57	0.2027	No	0.001022	3.7e-05	2.325	0.0465	0.03	0	14	0.03	0.09	0.156	0.55	0.12	14.1	9.1	0.11	NA	0.0518	0.0048							2.19	2.27	2.27	0.55	1.29	0.05	0.05	2e-06	0	1	1	0.9	1.22	1.22	1	Unpublished EMBSI study		0	0.00685
35	4	trout	isotridecanol (low concentration)	5.11	0.005237	No	0.001022	3.7e-05	0.515	0.0103	0.03	0	14	0.03	0.09	0.156	0.55	0.12	14.1	9.1	0.11	NA	0.0518	0.0048							3.69	3.81	3.81	0.56	1.29	0.05	0.05	2e-06	0	1	1	0.9	1.22	1.22	1	Unpublished EMBSI study		0	0.000672
36	4	trout	isotridecanol (high concentration)	5.11	0.005237	No	0.001022	3.7e-05	2.49	0.0498	0.03	0	14	0.03	0.09	0.156	0.55	0.12	14.1	9.1	0.11	NA	0.0518	0.0048							3.69	3.81	3.81	0.56	1.29	0.05	0.05	2e-06	0	1	1	0.9	1.22	1.22	1	Unpublished EMBSI study		0	0.0053
37	5	trout	methylnaphthalenes	3.86	0.0246	No	0.000829	5.9e-05	0.502	0.01	0.03	0	11	0.0289	0.09	0.156	0.55	0.12	13.4	7.9	0.29	NA	0.0638	0.0048							2.47	2.56	2.56	0.56	1.27	0.05	0.05	2e-06	0	1	1	0.9	1.22	1.22	1	Unpublished EMBSI study		0	0.0034
38	5	trout	di-methyl & ethyl naphthalenes	4.42	0.008	No	0.000829	5.9e-05	0.289	0.00578	0.03	0	11	0.0289	0.09	0.156	0.55	0.12	13.4	7.9	0.29	NA	0.0638	0.0048							3.02	3.12	3.12	0.56	1.27	0.05	0.05	2e-06	0	1	1	0.9	1.22	1.22	1	Unpublished EMBSI study		0	0.0041
39	5	trout	tri-methyl naphthalenes	4.73	0.0017	No	0.000829	5.9e-05	0.103	0.00206	0.03	0	11	0.0289	0.09	0.156	0.55	0.12	13.4	7.9	0.29	NA	0.0638	0.0048							3.32	3.43	3.43	0.56	1.27	0.05	0.05	2e-06	0	1	1	0.9	1.22	1.22	1	Unpublished EMBSI study		0	0.0014
40	6	trout	1-decene	5.7	0.0003288	No	0.002053	0.000113	0.0332	0.000664	0.02	0	10	0.0438	0.09	0.156	0.55	0.12	14.1	9.5	0.06	NA	0.0292	0.0023							4.26	4.4	4.4	0.56	2.07	0.05	0.05	2e-06	0	1	1	0.9	1.22	1.22	1	Unpublished EMBSI study		0	0.00076
41	6	trout	5-ethyl-1-nonene	5.53	0.0003966	No	0.002053	0.000113	0.0951	0.0019	0.02	0	10	0.0438	0.09	0.156	0.55	0.12	14.1	9.5	0.06	NA	0.0292	0.0023							4.09	4.23	4.23	0.56	2.07	0.05	0.05	2e-06	0	1	1	0.9	1.22	1.22	1	Unpublished EMBSI study		0	0.0066
42	6	trout	3-ethylnonane	5.67	0.0002971	No	0.002053	0.000113	0.0958	0.00192	0.02	0	10	0.0438	0.09	0.156	0.55	0.12	14.1	9.5	0.06	NA	0.0292	0.0023							4.23	4.37	4.37	0.56	2.07	0.05	0.05	2e-06	0	1	1	0.9	1.22	1.22	1	Unpublished EMBSI study		0	0.001
43	6	trout	1,4-diisopropylcyclohexane	5.83	0.0001916	No	0.002053	0.000113	0.0927	0.00185	0.02	0	10	0.0438	0.09	0.156	0.55	0.12	14.1	9.5	0.06	NA	0.0292	0.0023							4.39	4.53	4.53	0.56	2.07	0.05	0.05	2e-06	0	1	1	0.9	1.22	1.22	1	Unpublished EMBSI study		0	0.0046
44	6	trout	1-dodecene	6.1	0.0001127	No	0.002053	0.000113	0.0386	0.000772	0.02	0	10	0.0438	0.09	0.156	0.55	0.12	14.1	9.5	0.06	NA	0.0292	0.0023							4.65	4.8	4.8	0.56	2.07	0.05	0.05	2e-06	0	1	1	0.9	1.22	1.22	1	Unpublished EMBSI study		0	0.0011
45	6	trout	1-isobutyl-2,5-dimethylcyclohexane	5.83	0.0001916	No	0.002053	0.000113	0.0819	0.00164	0.02	0	10	0.0438	0.09	0.156	0.55	0.12	14.1	9.5	0.06	NA	0.0292	0.0023							4.39	4.53	4.53	0.56	2.07	0.05	0.05	2e-06	0	1	1	0.9	1.22	1.22	1	Unpublished EMBSI study		0	0.0035
46	6	trout	2,2,3-trimethyldecane	6.54	3.948e-05	No	0.002053	0.000113	0.0937	0.00187	0.02	0	10	0.0438	0.09	0.156	0.55	0.12	14.1	9.5	0.06	NA	0.0292	0.0023							5.07	5.24	5.24	0.56	2.07	0.05	0.05	2e-06	0	1	1	0.9	1.22	1.22	1	Unpublished EMBSI study		0	0.0018
47	6	trout	n-hexylcyclohexane	6.05	0.0001242	No	0.002053	0.000113	0.089	0.00178	0.02	0	10	0.0438	0.09	0.156	0.55	0.12	14.1	9.5	0.06	NA	0.0292	0.0023							4.6	4.75	4.75	0.56	2.07	0.05	0.05	2e-06	0	1	1	0.9	1.22	1.22	1	Unpublished EMBSI study		0	0.0012
48	6	trout	2,2,4,4,6,8,8-heptamethylnonane	7.79	2.1869e-06	No	0.002053	0.000113	0.0966	0.00193	0.02	0	10	0.0438	0.09	0.156	0.55	0.12	14.1	9.5	0.06	NA	0.0292	0.0023							6.29	6.49	6.49	0.56	2.07	0.05	0.05	2e-06	0	1	1	0.9	1.22	1.22	1	Unpublished EMBSI study		0	0.0063
49	6	trout	2,6,10-trimethyldodecane	7.49	4.421e-06	No	0.002053	0.000113	0.0921	0.00184	0.02	0	10	0.0438	0.09	0.156	0.55	0.12	14.1	9.5	0.06	NA	0.0292	0.0023							6	6.19	6.19	0.56	2.07	0.05	0.05	2e-06	0	1	1	0.9	1.22	1.22	1	Unpublished EMBSI study		0	0.0075
50	6	trout	1,1,6,-trimethyltetralin	5.38	0.001505	No	0.002053	0.000113	0.0952	0.0019	0.02	0	10	0.0438	0.09	0.156	0.55	0.12	14.1	9.5	0.06	NA	0.0292	0.0023							3.95	4.08	4.08	0.56	2.07	0.05	0.05	2e-06	0	1	1	0.9	1.22	1.22	1	Unpublished EMBSI study		0	0.0054
51	6	trout	1-hexadecene	8.06	1.232e-06	No	0.002053	0.000113	0.039	0.00078	0.02	0	10	0.0438	0.09	0.156	0.55	0.12	14.1	9.5	0.06	NA	0.0292	0.0023							6.55	6.76	6.76	0.56	2.07	0.05	0.05	2e-06	0	1	1	0.9	1.22	1.22	1	Unpublished EMBSI study		0	0.0037
52	7	trout	isoundecanol ethoxylate	3.31	0.05591	No	0.001345	9.7e-05	0.527	0.0105	0.03	0	10	0.0224	0.09	0.156	0.55	0.12	14.3	9	0.21	NA	0.0452	0.0042							1.94	2.01	2.01	0.54	1.6	0.05	0.05	2e-06	0	1	1	0.9	1.22	1.22	1	Unpublished EMBSI study		0	0.001
53	8	trout	5-ethyl-1-nonene	5.53	0.0003966	No	0.001496	0.000102	0.0285	0.00057	0.03	0	10	0.0333	0.09	0.156	0.55	0.12	14.1	9.1	0.11	NA	0.0309	0.0051							4.09	4.23	4.23	0.56	1.71	0.05	0.05	2e-06	0	1	1	0.9	1.22	1.22	1	Unpublished EMBSI study		0	0.0011
54	9	trout	2,6,10-trimethyldodecane	7.49	4.421e-06	No	0.00139	0.000111	0.031	0.00062	0.03	0	10	0.0313	0.09	0.156	0.55	0.12	14.1	9.1	0.11	NA	0.0263	0.0042							6	6.19	6.19	0.56	1.62	0.05	0.05	2e-06	0	1	1	0.9	1.22	1.22	1	Unpublished EMBSI study		0	0.0015
55	10	trout	5-ethyl-1-nonene	5.53	0.0003966	No	0.00102	5.4e-05	0.0517	0.00103	0.03	0	10	0.033	0.09	0.156	0.55	0.12	14.5	8.9	0.08	NA	0.0382	0.0016							4.09	4.23	4.23	0.56	1.32	0.05	0.05	2e-06	0	1	1	0.9	1.22	1.22	1	Unpublished EMBSI study		0	0.002
56	10	trout	2,3-dimethyldecane	6.09	0.0001126	No	0.00102	5.4e-05	0.0552	0.0011	0.03	0	10	0.033	0.09	0.156	0.55	0.12	14.5	8.9	0.08	NA	0.0382	0.0016							4.64	4.79	4.79	0.56	1.32	0.05	0.05	2e-06	0	1	1	0.9	1.22	1.22	1	Unpublished EMBSI study		0	0.00032
57	10	trout	2-methyl-1-tridecene	7.14	1.066e-05	No	0.00102	5.4e-05	0.06	0.0012	0.03	0	10	0.033	0.09	0.156	0.55	0.12	14.5	8.9	0.08	NA	0.0382	0.0016							5.66	5.84	5.84	0.56	1.32	0.05	0.05	2e-06	0	1	1	0.9	1.22	1.22	1	Unpublished EMBSI study		0	0.0011
58	10	trout	bicyclohexyl	5.86	0.000183	No	0.00102	5.4e-05	0.0495	0.00099	0.03	0	10	0.033	0.09	0.156	0.55	0.12	14.5	8.9	0.08	NA	0.0382	0.0016							4.41	4.56	4.56	0.56	1.32	0.05	0.05	2e-06	0	1	1	0.9	1.22	1.22	1	Unpublished EMBSI study		0	0.0013
59	10	trout	decylbenzene	7.35	2.4e-06	No	0.00102	5.4e-05	0.0501	0.001	0.03	0	10	0.033	0.09	0.156	0.55	0.12	14.5	8.9	0.08	NA	0.0382	0.0016							5.86	6.05	6.05	0.56	1.32	0.05	0.05	2e-06	0	1	1	0.9	1.22	1.22	1	Unpublished EMBSI study		0	0.0012
60	10	trout	3-phenylbicyclohexyl	7.5	1.031e-05	No	0.00102	5.4e-05	0.0516	0.00103	0.03	0	10	0.033	0.09	0.156	0.55	0.12	14.5	8.9	0.08	NA	0.0382	0.0016							6.01	6.2	6.2	0.56	1.32	0.05	0.05	2e-06	0	1	1	0.9	1.22	1.22	1	Unpublished EMBSI study		0	0.00084
61	10	trout	1,2-dicyclohexylethane	6.85	1.937e-05	No	0.00102	5.4e-05	0.0344	0.000688	0.03	0	10	0.033	0.09	0.156	0.55	0.12	14.5	8.9	0.08	NA	0.0382	0.0016							5.37	5.55	5.55	0.56	1.32	0.05	0.05	2e-06	0	1	1	0.9	1.22	1.22	1	Unpublished EMBSI study		0	0.00027
62	10	trout	4-pentyl-1-phenylbenzene	6.27	0.0001446	No	0.00102	5.4e-05	0.0466	0.000932	0.03	0	10	0.033	0.09	0.156	0.55	0.12	14.5	8.9	0.08	NA	0.0382	0.0016							4.81	4.97	4.97	0.56	1.32	0.05	0.05	2e-06	0	1	1	0.9	1.22	1.22	1	Unpublished EMBSI study		0	0.00034
63	10	trout	2,3-dimethyl-5-(4-methylpentyl)naphthalene	7.19	1.924e-05	No	0.00102	5.4e-05	0.0461	0.000922	0.03	0	10	0.033	0.09	0.156	0.55	0.12	14.5	8.9	0.08	NA	0.0382	0.0016							5.7	5.89	5.89	0.56	1.32	0.05	0.05	2e-06	0	1	1	0.9	1.22	1.22	1	Unpublished EMBSI study		0	0.00025
64	11	trout	2,6-dimethyldecane	6.09	0.0001126	No	0.0014	7e-05	0.0498	0.0016	0.03	0	10	0.033	0.09	0.156	0.55	0.12	14.6	8.5	0.07	NA	0.0383	0.0026							4.64	4.79	4.79	0.56	1.74	0.05	0.05	2e-06	0	1	1	0.9	1.22	1.22	1	Unpublished EMBSI study		0	0.00032
65	11	trout	n-dodecane	6.1	3.7e-06	No	0.0014	7e-05	0.0523	0.0016	0.03	0	10	0.033	0.09	0.156	0.55	0.12	14.6	8.5	0.07	NA	0.0383	0.0026							4.65	4.8	4.8	0.56	1.74	0.05	0.05	2e-06	0	1	1	0.9	1.22	1.22	1	Unpublished EMBSI study		0	0.00048
66	11	trout	n-heptylcyclohexane	6.54	4.049e-05	No	0.0014	7e-05	0.0461	0.0012	0.03	0	10	0.033	0.09	0.156	0.55	0.12	14.6	8.5	0.07	NA	0.0383	0.0026							5.07	5.24	5.24	0.56	1.74	0.05	0.05	2e-06	0	1	1	0.9	1.22	1.22	1	Unpublished EMBSI study		0	0.00031
67	11	trout	1,2,3,4,5,6,7,8-octahydrophenanthrene	5.92	0.0004495	No	0.0014	7e-05	0.0454	0.0008	0.03	0	10	0.033	0.09	0.156	0.55	0.12	14.6	8.5	0.07	NA	0.0383	0.0026							4.47	4.62	4.62	0.56	1.74	0.05	0.05	2e-06	0	1	1	0.9	1.22	1.22	1	Unpublished EMBSI study		0	0.0006
68	11	trout	3,3',5,5'-tetramethylbibenzyl	6.93	3.319e-05	No	0.0014	7e-05	0.0356	0.0013	0.03	0	10	0.033	0.09	0.156	0.55	0.12	14.6	8.5	0.07	NA	0.0383	0.0026							5.45	5.63	5.63	0.56	1.74	0.05	0.05	2e-06	0	1	1	0.9	1.22	1.22	1	Unpublished EMBSI study		0	0.0016
69	11	trout	2,3-dimethyl-2,3-diphenylbutane	6.48	7.994e-05	No	0.0014	7e-05	0.0381	0.0014	0.03	0	10	0.033	0.09	0.156	0.55	0.12	14.6	8.5	0.07	NA	0.0383	0.0026							5.02	5.18	5.18	0.56	1.74	0.05	0.05	2e-06	0	1	1	0.9	1.22	1.22	1	Unpublished EMBSI study		0	0.0005
70	11	trout	3,3',4,4'-tetramethyl-1,1'-biphenyl	5.95	0.0003234	No	0.0014	7e-05	0.0374	0.0006	0.03	0	10	0.033	0.09	0.156	0.55	0.12	14.6	8.5	0.07	NA	0.0383	0.0026							4.5	4.65	4.65	0.56	1.74	0.05	0.05	2e-06	0	1	1	0.9	1.22	1.22	1	Unpublished EMBSI study		0	6.6e-05
71	11	trout	5α(H)-androstane	6.65	1.248e-05	No	0.0014	7e-05	0.0367	0.0009	0.03	0	10	0.033	0.09	0.156	0.55	0.12	14.6	8.5	0.07	NA	0.0383	0.0026							5.18	5.35	5.35	0.56	1.74	0.05	0.05	2e-06	0	1	1	0.9	1.22	1.22	1	Unpublished EMBSI study		0	0.00089
72	11	trout	1,2,3,6,7,8-hexahydropyrene	6.12	0.000229	No	0.0014	7e-05	0.0389	0.0005	0.03	0	10	0.033	0.09	0.156	0.55	0.12	14.6	8.5	0.07	NA	0.0383	0.0026							4.67	4.82	4.82	0.56	1.74	0.05	0.05	2e-06	0	1	1	0.9	1.22	1.22	1	Unpublished EMBSI study		0	0.00033
73	12	trout	2,3-dimethylheptane	4.61	0.00311	No	0.0011	4.8e-05	0.0939	0.0025	0.03	0	13	0.0375	0.09	0.156	0.55	0.12	14.6	9.4	0.08	NA	0.0377	0.0017							3.2	3.31	3.31	0.56	1.32	0.05	0.05	2e-06	0	1	1	0.9	1.22	1.22	1	Unpublished EMBSI study		0	0.00063
74	12	trout	2,6-dimethyloctane	5.11	0.001038	No	0.0011	4.8e-05	0.0931	0.0011	0.03	0	13	0.0375	0.09	0.156	0.55	0.12	14.6	9.4	0.08	NA	0.0377	0.0017							3.69	3.81	3.81	0.56	1.32	0.05	0.05	2e-06	0	1	1	0.9	1.22	1.22	1	Unpublished EMBSI study		0	0.00043
75	12	trout	3-methyldecane	5.67	0.0002971	No	0.0011	4.8e-05	0.101	0.001	0.03	0	13	0.0375	0.09	0.156	0.55	0.12	14.6	9.4	0.08	NA	0.0377	0.0017							4.23	4.37	4.37	0.56	1.32	0.05	0.05	2e-06	0	1	1	0.9	1.22	1.22	1	Unpublished EMBSI study		0	0.00079
76	12	trout	2,3-dimethyldecane	6.09	0.0001126	No	0.0011	4.8e-05	0.0987	0.0009	0.03	0	13	0.0375	0.09	0.156	0.55	0.12	14.6	9.4	0.08	NA	0.0377	0.0017							4.64	4.79	4.79	0.56	1.32	0.05	0.05	2e-06	0	1	1	0.9	1.22	1.22	1	Unpublished EMBSI study		0	0.00085
77	12	trout	2-methylundecane	6.16	9.742e-05	No	0.0011	4.8e-05	0.0917	0.0009	0.03	0	13	0.0375	0.09	0.156	0.55	0.12	14.6	9.4	0.08	NA	0.0377	0.0017							4.71	4.86	4.86	0.56	1.32	0.05	0.05	2e-06	0	1	1	0.9	1.22	1.22	1	Unpublished EMBSI study		0	0.0015
78	12	trout	2,6-dimethylundecane	6.58	3.667e-05	No	0.0011	4.8e-05	0.108	0.002	0.03	0	13	0.0375	0.09	0.156	0.55	0.12	14.6	9.4	0.08	NA	0.0377	0.0017							5.11	5.28	5.28	0.56	1.32	0.05	0.05	2e-06	0	1	1	0.9	1.22	1.22	1	Unpublished EMBSI study		0	0.0022
79	12	trout	2,2,3-trimethyldecane	6.54	3.948e-05	No	0.0011	4.8e-05	0.0868	0.0008	0.03	0	13	0.0375	0.09	0.156	0.55	0.12	14.6	9.4	0.08	NA	0.0377	0.0017							5.07	5.24	5.24	0.56	1.32	0.05	0.05	2e-06	0	1	1	0.9	1.22	1.22	1	Unpublished EMBSI study		0	0.0011
80	12	trout	4-methyldodecane	6.65	3.173e-05	No	0.0011	4.8e-05	0.121	0.001	0.03	0	13	0.0375	0.09	0.156	0.55	0.12	14.6	9.4	0.08	NA	0.0377	0.0017							5.18	5.35	5.35	0.56	1.32	0.05	0.05	2e-06	0	1	1	0.9	1.22	1.22	1	Unpublished EMBSI study		0	0.0027
81	12	trout	n-tetradecane	7.2	2.2e-06	No	0.0011	4.8e-05	0.103	0.001	0.03	0	13	0.0375	0.09	0.156	0.55	0.12	14.6	9.4	0.08	NA	0.0377	0.0017							5.71	5.9	5.9	0.56	1.32	0.05	0.05	2e-06	0	1	1	0.9	1.22	1.22	1	Unpublished EMBSI study		0	0.0092
82	12	trout	2-isopropyldecalin	5.52	0.0003061	No	0.0011	4.8e-05	0.0944	0.001	0.03	0	13	0.0375	0.09	0.156	0.55	0.12	14.6	9.4	0.08	NA	0.0377	0.0017							4.08	4.22	4.22	0.56	1.32	0.05	0.05	2e-06	0	1	1	0.9	1.22	1.22	1	Unpublished EMBSI study		0	0.0005
83	12	trout	3-methyl-1-hexylcyclohexane	6.47	4.679e-05	No	0.0011	4.8e-05	0.0861	0.0007	0.03	0	13	0.0375	0.09	0.156	0.55	0.12	14.6	9.4	0.08	NA	0.0377	0.0017							5.01	5.17	5.17	0.56	1.32	0.05	0.05	2e-06	0	1	1	0.9	1.22	1.22	1	Unpublished EMBSI study		0	0.0005
84	12	trout	n-octylcyclohexane	7.03	1.312e-05	No	0.0011	4.8e-05	0.0876	0.0005	0.03	0	13	0.0375	0.09	0.156	0.55	0.12	14.6	9.4	0.08	NA	0.0377	0.0017							5.55	5.73	5.73	0.56	1.32	0.05	0.05	2e-06	0	1	1	0.9	1.22	1.22	1	Unpublished EMBSI study		0	0.00075
85	12	trout	2-hexyltetralin	6.96	4.093e-05	No	0.0011	4.8e-05	0.102	0.001	0.03	0	13	0.0375	0.09	0.156	0.55	0.12	14.6	9.4	0.08	NA	0.0377	0.0017							5.48	5.66	5.66	0.56	1.32	0.05	0.05	2e-06	0	1	1	0.9	1.22	1.22	1	Unpublished EMBSI study		0	0.0002
86	13	trout	hexachlorobenzene	5.73	6.2e-06	No	0.00112	4e-05	0.0243	0.0014	0.03	0	14	0.0322	0.09	0.156	0.55	0.12	13.6	9.7	0.11	NA	0.0405	0.0014							4.29	4.43	4.43	0.56	1.29	0.05	0.05	2e-06	0	1	1	0.9	1.22	1.22	1	Lo et al. 2016		0	0.0036
87	13	trout	1,1,3,3,5-pentamethylindan	5.76	0.0006088	No	0.00112	4e-05	0.0482	0.001	0.03	0	14	0.0322	0.09	0.156	0.55	0.12	13.6	9.7	0.11	NA	0.0405	0.0014							4.32	4.46	4.46	0.56	1.29	0.05	0.05	2e-06	0	1	1	0.9	1.22	1.22	1	Lo et al. 2016		0	0.0013
88	13	trout	2,2,5,7-tetramethyltetraline	5.92	0.0004381	No	0.00112	4e-05	0.0843	0.0014	0.03	0	14	0.0322	0.09	0.156	0.55	0.12	13.6	9.7	0.11	NA	0.0405	0.0014							4.47	4.62	4.62	0.56	1.29	0.05	0.05	2e-06	0	1	1	0.9	1.22	1.22	1	Lo et al. 2016		0	0.00081
89	13	trout	6-n-butyl-2,3-dimethylnaphthalene	6.28	0.0001624	No	0.00112	4e-05	0.0799	0.0023	0.03	0	14	0.0322	0.09	0.156	0.55	0.12	13.6	9.7	0.11	NA	0.0405	0.0014							4.82	4.98	4.98	0.56	1.29	0.05	0.05	2e-06	0	1	1	0.9	1.22	1.22	1	Lo et al. 2016		0	0.00056
90	13	trout	2,3-dimethyl-5-(4-methylpentyl)naphthalene	7.19	1.924e-05	No	0.00112	4e-05	0.0938	0.0033	0.03	0	14	0.0322	0.09	0.156	0.55	0.12	13.6	9.7	0.11	NA	0.0405	0.0014							5.7	5.89	5.89	0.56	1.29	0.05	0.05	2e-06	0	1	1	0.9	1.22	1.22	1	Lo et al. 2016		0	0.00069
91	13	trout	fichtelite	6.54	0.00654	No	0.00112	4e-05	0.0437	0.0018	0.03	0	14	0.0322	0.09	0.156	0.55	0.12	13.6	9.7	0.11	NA	0.0405	0.0014							5.07	5.24	5.24	0.56	1.29	0.05	0.05	2e-06	0	1	1	0.9	1.22	1.22	1	Lo et al. 2016		0	0.0017
92	13	trout	dehydroabietine	6.43	0.00643	No	0.00112	4e-05	0.0867	0.0039	0.03	0	14	0.0322	0.09	0.156	0.55	0.12	13.6	9.7	0.11	NA	0.0405	0.0014							4.97	5.13	5.13	0.56	1.29	0.05	0.05	2e-06	0	1	1	0.9	1.22	1.22	1	Lo et al. 2016		0	0.0012
93	13	trout	9-n-butylphenanthrene	6.37	8.196e-06	No	0.00112	4e-05	0.0916	0.0062	0.03	0	14	0.0322	0.09	0.156	0.55	0.12	13.6	9.7	0.11	NA	0.0405	0.0014							4.91	5.07	5.07	0.56	1.29	0.05	0.05	2e-06	0	1	1	0.9	1.22	1.22	1	Lo et al. 2016		0	0.00053
94	13	trout	1-ethylpyrene	5.97	1.871e-05	No	0.00112	4e-05	0.0462	0.002	0.03	0	14	0.0322	0.09	0.156	0.55	0.12	13.6	9.7	0.11	NA	0.0405	0.0014							4.52	4.67	4.67	0.56	1.29	0.05	0.05	2e-06	0	1	1	0.9	1.22	1.22	1	Lo et al. 2016		0	0.00021
95	13	trout	2,3,6,7-tetramethylanthracene	6.53	5.883e-06	No	0.00112	4e-05	0.0468	0.0017	0.03	0	14	0.0322	0.09	0.156	0.55	0.12	13.6	9.7	0.11	NA	0.0405	0.0014							5.06	5.23	5.23	0.56	1.29	0.05	0.05	2e-06	0	1	1	0.9	1.22	1.22	1	Lo et al. 2016		0	0.00022
96	13	trout	chrysene	5.81	2.725e-06	No	0.00112	4e-05	0.0834	0.0033	0.03	0	14	0.0322	0.09	0.156	0.55	0.12	13.6	9.7	0.11	NA	0.0405	0.0014							4.37	4.51	4.51	0.56	1.29	0.05	0.05	2e-06	0	1	1	0.9	1.22	1.22	1	Lo et al. 2016		0	0.00046
97	13	trout	1-octylpyrene	8.92	1.898e-08	No	0.00112	4e-05	0.0427	0.0007	0.03	0	14	0.0322	0.09	0.156	0.55	0.12	13.6	9.7	0.11	NA	0.0405	0.0014							7.38	7.62	7.62	0.56	1.29	0.05	0.05	2e-06	0	1	1	0.9	1.22	1.22	1	Lo et al. 2016		0	0.00044
98	13	trout	benzo[b]chrysene	7.11	3.304e-06	No	0.00112	4e-05	0.0288	0.0008	0.03	0	14	0.0322	0.09	0.156	0.55	0.12	13.6	9.7	0.11	NA	0.0405	0.0014							5.63	5.81	5.81	0.56	1.29	0.05	0.05	2e-06	0	1	1	0.9	1.22	1.22	1	Lo et al. 2016		0	0.00012
99	14	trout	hexachlorobenzene	5.73	6.2e-06	No	0.00137	5e-05	0.0286	0.0011	0.03	0	13	0.0346	0.09	0.156	0.55	0.12	13.6	9.7	0.11	NA	0.0354	0.0018							4.29	4.43	4.43	0.56	1.5	0.05	0.05	2e-06	0	1	1	0.9	1.22	1.22	1	Lo et al. 2016		0	0.003
100	14	trout	3,5,5'-trimethyl hexene	4.44	0.004458	No	0.00137	5e-05	0.0889	0.0014	0.03	0	13	0.0346	0.09	0.156	0.55	0.12	13.6	9.7	0.11	NA	0.0354	0.0018							3.04	3.14	3.14	0.56	1.5	0.05	0.05	2e-06	0	1	1	0.9	1.22	1.22	1	Lo et al. 2016		0	0.0012
101	14	trout	2-methyl-1-nonene	5.17	0.0009284	No	0.00137	5e-05	0.1	0.001	0.03	0	13	0.0346	0.09	0.156	0.55	0.12	13.6	9.7	0.11	NA	0.0354	0.0018							3.74	3.87	3.87	0.56	1.5	0.05	0.05	2e-06	0	1	1	0.9	1.22	1.22	1	Lo et al. 2016		0	0.0023
102	14	trout	2-methyldecane	5.67	0.0002971	No	0.00137	5e-05	0.0951	0.0009	0.03	0	13	0.0346	0.09	0.156	0.55	0.12	13.6	9.7	0.11	NA	0.0354	0.0018							4.23	4.37	4.37	0.56	1.5	0.05	0.05	2e-06	0	1	1	0.9	1.22	1.22	1	Lo et al. 2016		0	0.0017
103	14	trout	C7 iso-alkyl benzene	5.38	0.001472	No	0.00137	5e-05	0.0519	0.0012	0.03	0	13	0.0346	0.09	0.156	0.55	0.12	13.6	9.7	0.11	NA	0.0354	0.0018							3.95	4.08	4.08	0.56	1.5	0.05	0.05	2e-06	0	1	1	0.9	1.22	1.22	1	Lo et al. 2016		0	0.0013
104	14	trout	1-undecene	5.61	0.0003432	No	0.00137	5e-05	0.11	0.001	0.03	0	13	0.0346	0.09	0.156	0.55	0.12	13.6	9.7	0.11	NA	0.0354	0.0018							4.17	4.31	4.31	0.56	1.5	0.05	0.05	2e-06	0	1	1	0.9	1.22	1.22	1	Lo et al. 2016		0	0.0023
105	14	trout	2-methyl-1-undecene	6.15	0.0001009	No	0.00137	5e-05	0.0558	0.0011	0.03	0	13	0.0346	0.09	0.156	0.55	0.12	13.6	9.7	0.11	NA	0.0354	0.0018							4.7	4.85	4.85	0.56	1.5	0.05	0.05	2e-06	0	1	1	0.9	1.22	1.22	1	Lo et al. 2016		0	0.00083
106	14	trout	2-methyl-1-dodecene	6.65	3.289e-05	No	0.00137	5e-05	0.0585	0.0013	0.03	0	13	0.0346	0.09	0.156	0.55	0.12	13.6	9.7	0.11	NA	0.0354	0.0018							5.18	5.35	5.35	0.56	1.5	0.05	0.05	2e-06	0	1	1	0.9	1.22	1.22	1	Lo et al. 2016		0	0.0024
107	14	trout	1-tridecene	6.59	3.674e-05	No	0.00137	5e-05	0.061	0.0017	0.03	0	13	0.0346	0.09	0.156	0.55	0.12	13.6	9.7	0.11	NA	0.0354	0.0018							5.12	5.29	5.29	0.56	1.5	0.05	0.05	2e-06	0	1	1	0.9	1.22	1.22	1	Lo et al. 2016		0	0.0035
108	14	trout	n-tridecane	6.73	4.7e-06	No	0.00137	5e-05	0.0507	0.0001	0.03	0	13	0.0346	0.09	0.156	0.55	0.12	13.6	9.7	0.11	NA	0.0354	0.0018							5.26	5.43	5.43	0.56	1.5	0.05	0.05	2e-06	0	1	1	0.9	1.22	1.22	1	Lo et al. 2016		0	0.0042
109	14	trout	2-butyl-1-decene	7.14	1.066e-05	No	0.00137	5e-05	0.0659	0.0015	0.03	0	13	0.0346	0.09	0.156	0.55	0.12	13.6	9.7	0.11	NA	0.0354	0.0018							5.66	5.84	5.84	0.56	1.5	0.05	0.05	2e-06	0	1	1	0.9	1.22	1.22	1	Lo et al. 2016		0	0.0028
110	15	trout	hexachlorobenzene	5.73	6.2e-06	No	0.0019	0.0002	0.0223	0.00025	0.03	0	13	0.0327	0.09	0.156	0.55	0.12	13.6	9.7	0.11	NA	0.0355	0.0022							4.29	4.43	4.43	0.56	1.91	0.05	0.05	2e-06	0	1	1	0.9	1.22	1.22	1	Lo et al. 2016		0	0.0026
111	15	trout	1,3-dimethyladamantane	4.84	0.001386	No	0.0019	0.0002	0.0996	0.000726	0.03	0	13	0.0327	0.09	0.156	0.55	0.12	13.6	9.7	0.11	NA	0.0355	0.0022							3.42	3.54	3.54	0.56	1.91	0.05	0.05	2e-06	0	1	1	0.9	1.22	1.22	1	Lo et al. 2016		0	0.0024
112	15	trout	1,3,5-triisopropylbenzene	6.36	0.0001536	No	0.0019	0.0002	0.0892	0.000582	0.03	0	13	0.0327	0.09	0.156	0.55	0.12	13.6	9.7	0.11	NA	0.0355	0.0022							4.9	5.06	5.06	0.56	1.91	0.05	0.05	2e-06	0	1	1	0.9	1.22	1.22	1	Lo et al. 2016		0	0.0058
113	15	trout	2,7-di-isopropyldecalin	6.85	1.374e-05	No	0.0019	0.0002	0.0925	0.000624	0.03	0	13	0.0327	0.09	0.156	0.55	0.12	13.6	9.7	0.11	NA	0.0355	0.0022							5.37	5.55	5.55	0.56	1.91	0.05	0.05	2e-06	0	1	1	0.9	1.22	1.22	1	Lo et al. 2016		0	0.0022
114	15	trout	hexadecahydropyrene	5.94	8.622e-05	No	0.0019	0.0002	0.118	0.000749	0.03	0	13	0.0327	0.09	0.156	0.55	0.12	13.6	9.7	0.11	NA	0.0355	0.0022							4.49	4.64	4.64	0.56	1.91	0.05	0.05	2e-06	0	1	1	0.9	1.22	1.22	1	Lo et al. 2016		0	0.0086
115	15	trout	hydrogenated 1-methyl-7-(1-methylethyl)-phenanthrene (hydrogenated retene)	6.96	7.956e-06	No	0.0019	0.0002	0.108	0.000601	0.03	0	13	0.0327	0.09	0.156	0.55	0.12	13.6	9.7	0.11	NA	0.0355	0.0022							5.48	5.66	5.66	0.56	1.91	0.05	0.05	2e-06	0	1	1	0.9	1.22	1.22	1	Lo et al. 2016		0	0.0044
116	15	trout	1,2,3,10b-tetrahydrofluoranthene	4.39	0.00056	No	0.0019	0.0002	0.0844	0.000577	0.03	0	13	0.0327	0.09	0.156	0.55	0.12	13.6	9.7	0.11	NA	0.0355	0.0022							2.99	3.09	3.09	0.56	1.91	0.05	0.05	2e-06	0	1	1	0.9	1.22	1.22	1	Lo et al. 2016		0	0.00095
117	15	trout	4,5,9,10-tetrahydropyrene	5.04	0.0001574	No	0.0019	0.0002	0.0367	0.00026	0.03	0	13	0.0327	0.09	0.156	0.55	0.12	13.6	9.7	0.11	NA	0.0355	0.0022							3.62	3.74	3.74	0.56	1.91	0.05	0.05	2e-06	0	1	1	0.9	1.22	1.22	1	Lo et al. 2016		0	0.00044
118	15	trout	1-methyl-7-(1-methylethyl)-phenanthrene (retene)	6.35	8.48e-06	No	0.0019	0.0002	0.0589	0.00121	0.03	0	13	0.0327	0.09	0.156	0.55	0.12	13.6	9.7	0.11	NA	0.0355	0.0022							4.89	5.05	5.05	0.56	1.91	0.05	0.05	2e-06	0	1	1	0.9	1.22	1.22	1	Lo et al. 2016		0	0.00074
119	15	trout	3-methylcholanthrene	6.42	2.9e-06	No	0.0019	0.0002	0.053	0.000936	0.03	0	13	0.0327	0.09	0.156	0.55	0.12	13.6	9.7	0.11	NA	0.0355	0.0022							4.96	5.12	5.12	0.56	1.91	0.05	0.05	2e-06	0	1	1	0.9	1.22	1.22	1	Lo et al. 2016		0	0.0007
120	15	trout	indeno[1,2,3-cd]pyrene	6.7	1.9e-07	No	0.0019	0.0002	0.0359	0.000688	0.03	0	13	0.0327	0.09	0.156	0.55	0.12	13.6	9.7	0.11	NA	0.0355	0.0022							5.23	5.4	5.4	0.56	1.91	0.05	0.05	2e-06	0	1	1	0.9	1.22	1.22	1	Lo et al. 2016		0	0.00045
121	15	trout	benzo[ghi]perylene	6.63	2.6e-07	No	0.0019	0.0002	0.0289	0.000692	0.03	0	13	0.0327	0.09	0.156	0.55	0.12	13.6	9.7	0.11	NA	0.0355	0.0022							5.16	5.33	5.33	0.56	1.91	0.05	0.05	2e-06	0	1	1	0.9	1.22	1.22	1	Lo et al. 2016		0	0.0004
122	16	trout	hexachlorobenzene	5.73	6.2e-06	No	0.0019	0.0002	0.0269	0.0003	0.03	0	11	0.0558	0.09	0.156	0.55	0.12	13.6	9.7	0.11	NA	0.0255	0.0024							4.29	4.43	4.43	0.56	1.91	0.05	0.05	2e-06	0	1	1	0.9	1.22	1.22	1	Lo et al. 2016		0	0.0019
123	16	trout	2,2,4,4,6,8,8-heptamethylnonane	7.79	2.1869e-06	No	0.0019	0.0002	0.0731	0.001	0.03	0	11	0.0558	0.09	0.156	0.55	0.12	13.6	9.7	0.11	NA	0.0255	0.0024							6.29	6.49	6.49	0.56	1.91	0.05	0.05	2e-06	0	1	1	0.9	1.22	1.22	1	Lo et al. 2016		0	0.00077
124	16	trout	2-isopropyldecalin	5.52	0.0003061	No	0.0019	0.0002	0.0429	0.0006	0.03	0	11	0.0558	0.09	0.156	0.55	0.12	13.6	9.7	0.11	NA	0.0255	0.0024							4.08	4.22	4.22	0.56	1.91	0.05	0.05	2e-06	0	1	1	0.9	1.22	1.22	1	Lo et al. 2016		0	0.00041
125	16	trout	n-octylbenzene	6.3	6.6e-05	No	0.0019	0.0002	0.0906	0.0009	0.03	0	11	0.0558	0.09	0.156	0.55	0.12	13.6	9.7	0.11	NA	0.0255	0.0024							4.84	5	5	0.56	1.91	0.05	0.05	2e-06	0	1	1	0.9	1.22	1.22	1	Lo et al. 2016		0	0.00055
126	16	trout	4-ethylbiphenyl	4.8	0.004311	No	0.0019	0.0002	0.0864	0.0012	0.03	0	11	0.0558	0.09	0.156	0.55	0.12	13.6	9.7	0.11	NA	0.0255	0.0024							3.39	3.5	3.5	0.56	1.91	0.05	0.05	2e-06	0	1	1	0.9	1.22	1.22	1	Lo et al. 2016		0	0.00087
127	16	trout	2,7-diisopropylnaphthalene	6.08	0.0002421	No	0.0019	0.0002	0.0523	0.0005	0.03	0	11	0.0558	0.09	0.156	0.55	0.12	13.6	9.7	0.11	NA	0.0255	0.0024							4.63	4.78	4.78	0.56	1.91	0.05	0.05	2e-06	0	1	1	0.9	1.22	1.22	1	Lo et al. 2016		0	0.00069
128	16	trout	anthracene	4.45	4.34e-05	No	0.0019	0.0002	0.0946	0.0011	0.03	0	11	0.0558	0.09	0.156	0.55	0.12	13.6	9.7	0.11	NA	0.0255	0.0024							3.05	3.15	3.15	0.56	1.91	0.05	0.05	2e-06	0	1	1	0.9	1.22	1.22	1	Lo et al. 2016		0	0.0012
129	16	trout	o-terphenyl	5.52	0.00124	No	0.0019	0.0002	0.0732	0.0009	0.03	0	11	0.0558	0.09	0.156	0.55	0.12	13.6	9.7	0.11	NA	0.0255	0.0024							4.08	4.22	4.22	0.56	1.91	0.05	0.05	2e-06	0	1	1	0.9	1.22	1.22	1	Lo et al. 2016		0	0.0018
130	16	trout	fluoranthene	5.16	0.00026	No	0.0019	0.0002	0.0746	0.0009	0.03	0	11	0.0558	0.09	0.156	0.55	0.12	13.6	9.7	0.11	NA	0.0255	0.0024							3.74	3.86	3.86	0.56	1.91	0.05	0.05	2e-06	0	1	1	0.9	1.22	1.22	1	Lo et al. 2016		0	0.0016
131	16	trout	benzo[b]fluorene	5.77	4e-06	No	0.0019	0.0002	0.0452	0.0005	0.03	0	11	0.0558	0.09	0.156	0.55	0.12	13.6	9.7	0.11	NA	0.0255	0.0024							4.33	4.47	4.47	0.56	1.91	0.05	0.05	2e-06	0	1	1	0.9	1.22	1.22	1	Lo et al. 2016		0	0.00091
132	16	trout	triphenylene	5.49	4.11e-05	No	0.0019	0.0002	0.0861	0.001	0.03	0	11	0.0558	0.09	0.156	0.55	0.12	13.6	9.7	0.11	NA	0.0255	0.0024							4.06	4.19	4.19	0.56	1.91	0.05	0.05	2e-06	0	1	1	0.9	1.22	1.22	1	Lo et al. 2016		0	0.0011
133	16	trout	7-methylbenz[a]anthracene	6.07	1.1e-05	No	0.0019	0.0002	0.0478	0.0005	0.03	0	11	0.0558	0.09	0.156	0.55	0.12	13.6	9.7	0.11	NA	0.0255	0.0024							4.62	4.77	4.77	0.56	1.91	0.05	0.05	2e-06	0	1	1	0.9	1.22	1.22	1	Lo et al. 2016		0	0.00042
134	16	trout	benzo[k]fluoranthene	6.11	8e-07	No	0.0019	0.0002	0.045	0.0005	0.03	0	11	0.0558	0.09	0.156	0.55	0.12	13.6	9.7	0.11	NA	0.0255	0.0024							4.66	4.81	4.81	0.56	1.91	0.05	0.05	2e-06	0	1	1	0.9	1.22	1.22	1	Lo et al. 2016		0	0.00042
135	17	trout	1-heptadecyne	7.92	1.409e-06	No	0.001937	9.4e-05	0.0633	0.0008	0.03	0	11	0.0364	0.09	0.156	0.55	0.12	14.9	9.2	0.07	NA	0.0329	0.0018							6.41	6.62	6.62	0.56	2.04	0.05	0.05	2e-06	0	1	1	0.9	1.22	1.22	1	Unpublished EMBSI study		0	0.0048
136	17	trout	1,1':3',1"-tercyclohexane	8.55	3.498e-07	No	0.001937	9.4e-05	0.069	0.0013	0.03	0	11	0.0364	0.09	0.156	0.55	0.12	14.9	9.2	0.07	NA	0.0329	0.0018							7.02	7.25	7.25	0.56	2.04	0.05	0.05	2e-06	0	1	1	0.9	1.22	1.22	1	Unpublished EMBSI study		0	0.0027
137	17	trout	dicyclohexylbenzene	7.63	7.99e-06	No	0.001937	9.4e-05	0.0817	0.0015	0.03	0	11	0.0364	0.09	0.156	0.55	0.12	14.9	9.2	0.07	NA	0.0329	0.0018							6.13	6.33	6.33	0.56	2.04	0.05	0.05	2e-06	0	1	1	0.9	1.22	1.22	1	Unpublished EMBSI study		0	0.002
138	17	trout	cyclohexylbiphenyl	6.57	6.835e-05	No	0.001937	9.4e-05	0.0746	0.0019	0.03	0	11	0.0364	0.09	0.156	0.55	0.12	14.9	9.2	0.07	NA	0.0329	0.0018							5.1	5.27	5.27	0.56	2.04	0.05	0.05	2e-06	0	1	1	0.9	1.22	1.22	1	Unpublished EMBSI study		0	0.0011
139	17	trout	m-terphenyl	5.52	0.00151	No	0.001937	9.4e-05	0.0452	0.0013	0.03	0	11	0.0364	0.09	0.156	0.55	0.12	14.9	9.2	0.07	NA	0.0329	0.0018							4.08	4.22	4.22	0.56	2.04	0.05	0.05	2e-06	0	1	1	0.9	1.22	1.22	1	Unpublished EMBSI study		0	0.00055
140	17	trout	dodecahydrochrysene	6.94	3.147e-05	No	0.001937	9.4e-05	0.0419	0.0004	0.03	0	11	0.0364	0.09	0.156	0.55	0.12	14.9	9.2	0.07	NA	0.0329	0.0018							5.46	5.64	5.64	0.56	2.04	0.05	0.05	2e-06	0	1	1	0.9	1.22	1.22	1	Unpublished EMBSI study		0	0.0019
141	17	trout	hexahydrochrysene	6.7	4.217e-06	No	0.001937	9.4e-05	0.0901	0.0009	0.03	0	11	0.0364	0.09	0.156	0.55	0.12	14.9	9.2	0.07	NA	0.0329	0.0018							5.23	5.4	5.4	0.56	2.04	0.05	0.05	2e-06	0	1	1	0.9	1.22	1.22	1	Unpublished EMBSI study		0	0.0012
142	17	trout	octahydrochrysene	7.1	2.44e-05	No	0.001937	9.4e-05	0.0691	0.0008	0.03	0	11	0.0364	0.09	0.156	0.55	0.12	14.9	9.2	0.07	NA	0.0329	0.0018							5.62	5.8	5.8	0.56	2.04	0.05	0.05	2e-06	0	1	1	0.9	1.22	1.22	1	Unpublished EMBSI study		0	0.00095
143	17	trout	chrysene	5.81	2.725e-06	No	0.001937	9.4e-05	0.0536	0.0039	0.03	0	11	0.0364	0.09	0.156	0.55	0.12	14.9	9.2	0.07	NA	0.0329	0.0018							4.37	4.51	4.51	0.56	2.04	0.05	0.05	2e-06	0	1	1	0.9	1.22	1.22	1	Unpublished EMBSI study		0	0.00081
144	17	trout	benzo[c]chrysene	7.11	4.31e-06	No	0.001937	9.4e-05	0.0299	0.0004	0.03	0	11	0.0364	0.09	0.156	0.55	0.12	14.9	9.2	0.07	NA	0.0329	0.0018							5.63	5.81	5.81	0.56	2.04	0.05	0.05	2e-06	0	1	1	0.9	1.22	1.22	1	Unpublished EMBSI study		0	0.00042
145	18	trout	hexachlorobenzene	5.73	6.2e-06	No	0.00141	7e-05	0.0246	0.000492	0.03	0	11	0.0338	0.09	0.156	0.55	0.12	13.6	9.7	0.11	NA	0.042	0.0014							4.29	4.43	4.43	0.56	1.53	0.05	0.05	2e-06	0	1	1	0.9	1.22	1.22	1	Lo et al. 2016		0	0.0018
146	18	trout	perhydrochrysene	6.24	3.384e-05	No	0.00141	7e-05	0.136	0.00272	0.03	0	11	0.0338	0.09	0.156	0.55	0.12	13.6	9.7	0.11	NA	0.042	0.0014							4.78	4.94	4.94	0.56	1.53	0.05	0.05	2e-06	0	1	1	0.9	1.22	1.22	1	Lo et al. 2016		0	0.005
147	18	trout	fluoranthene	5.16	0.00026	No	0.00141	7e-05	0.087	0.00174	0.03	0	11	0.0338	0.09	0.156	0.55	0.12	13.6	9.7	0.11	NA	0.042	0.0014							3.74	3.86	3.86	0.56	1.53	0.05	0.05	2e-06	0	1	1	0.9	1.22	1.22	1	Lo et al. 2016		0	0.00081
148	18	trout	benzo[b]fluorene	5.77	4e-06	No	0.00141	7e-05	0.0424	0.000848	0.03	0	11	0.0338	0.09	0.156	0.55	0.12	13.6	9.7	0.11	NA	0.042	0.0014							4.33	4.47	4.47	0.56	1.53	0.05	0.05	2e-06	0	1	1	0.9	1.22	1.22	1	Lo et al. 2016		0	0.00037
149	18	trout	6-methylchrysene	6.07	6.35e-05	No	0.00141	7e-05	0.049	0.00098	0.03	0	11	0.0338	0.09	0.156	0.55	0.12	13.6	9.7	0.11	NA	0.042	0.0014							4.62	4.77	4.77	0.56	1.53	0.05	0.05	2e-06	0	1	1	0.9	1.22	1.22	1	Lo et al. 2016		0	0.00046
150	18	trout	6-ethylchrysene	6.56	4.235e-06	No	0.00141	7e-05	0.0738	0.00148	0.03	0	11	0.0338	0.09	0.156	0.55	0.12	13.6	9.7	0.11	NA	0.042	0.0014							5.09	5.26	5.26	0.56	1.53	0.05	0.05	2e-06	0	1	1	0.9	1.22	1.22	1	Lo et al. 2016		0	0.0007
151	19	trout	hexachlorobenzene	5.73	6.2e-06	No	0.0016	0.0002	0.0221	0.000442	0.03	0	13	0.0511	0.09	0.15	0.55	0.12	13.6	9.7	0.11	NA	0.041	0.0014							4.29	4.43	4.43	0.56	1.68	0.05	0.05	2e-06	0	1	1	0.9	1.22	1.22	1	Lo et al. 2016		1	0.00593
152	19	trout	musk xylene	4.45	0.0008214	No	0.0016	0.0002	0.0547	0.00109	0.03	0	13	0.0511	0.09	0.15	0.55	0.12	13.6	9.7	0.11	NA	0.041	0.0014							3.05	3.15	3.15	0.56	1.68	0.05	0.05	2e-06	0	1	1	0.9	1.22	1.22	1	Lo et al. 2016		1	0.00594
153	19	trout	o-terphenyl	5.52	0.00124	No	0.0016	0.0002	0.0455	0.00091	0.03	0	13	0.0511	0.09	0.15	0.55	0.12	13.6	9.7	0.11	NA	0.041	0.0014							4.08	4.22	4.22	0.56	1.68	0.05	0.05	2e-06	0	1	1	0.9	1.22	1.22	1	Lo et al. 2016		1	0.00307
154	19	trout	methoxychlor	5.08	0.0001	No	0.0016	0.0002	0.0968	0.00194	0.03	0	13	0.0511	0.09	0.15	0.55	0.12	13.6	9.7	0.11	NA	0.041	0.0014							3.66	3.78	3.78	0.56	1.68	0.05	0.05	2e-06	0	1	1	0.9	1.22	1.22	1	Lo et al. 2016		1	0.00272
155	19	trout	benzo[a]pyrene	6.13	1.62e-06	No	0.0016	0.0002	0.151	0.00302	0.03	0	13	0.0511	0.09	0.15	0.55	0.12	13.6	9.7	0.11	NA	0.041	0.0014							4.68	4.83	4.83	0.56	1.68	0.05	0.05	2e-06	0	1	1	0.9	1.22	1.22	1	Lo et al. 2016		1	0.00106
156	20	trout	diisopheptyl phthalate	7.41	2.446e-06	No	0.000382	2.3e-05	1.08	0.0216	0.03	0	14	0.04	0.09	0.15	0.55	0.12	13.1	10.5	0.03	NA	0.0463	0.002							5.92	6.11	6.11	0.56	0.54	0.05	0.05	2e-06	0	1	1	0.9	1.22	1.22	1	Unpublished EMBSI study		0.08	0.00951
157	21	trout	C9-12 isoalkanes (solvent mixture)	4.61	0.00311	No	0.000937	3.4e-05	0.998	0.02	0.03	0	10	0.0372	0.09	0.156	0.55	0.12	14.1	9.3	0.17	NA	0.0488	0.0017							3.2	3.31	3.31	0.56	1.18	0.05	0.05	2e-06	0	1	1	0.9	1.22	1.22	1	Unpublished EMBSI study		0	0.0097
158	22	trout	deuterated di-2-ethylexyl phthalate	7.6	0.00027	No	0.001009	4.6e-05	0.0924	0.00185	0.03	0	14	0.024	0.09	0.156	0.55	0.12	14.3	7.7	0.27	NA	0.0522	0.0032							6.1	6.3	6.3	0.56	1.51	0.05	0.05	2e-06	0	1	1	0.9	1.22	1.22	1	Unpublished EMBSI study		0	0.000738
159	23	trout	diisononyl adipate	9.24	3.978e-08	No	0.004134	0.000184	0.512	0.0102	0.03	0	9	0.042	0.09	0.156	0.55	0.12	13.5	9.6	0.07	NA	0.0427	0.0062							7.69	7.94	7.94	0.56	3.43	0.05	0.05	2e-06	0	1	1	0.9	1.22	1.22	1	Unpublished EMBSI study		0	0.00062
160	23	trout	diisotridecyl adipate	13.17	3.429e-12	No	0.004134	0.000184	0.492	0.00984	0.03	0	9	0.042	0.09	0.156	0.55	0.12	13.5	9.6	0.07	NA	0.0427	0.0062							11.5	11.87	11.87	0.56	3.43	0.05	0.05	2e-06	0	1	1	0.9	1.22	1.22	1	Unpublished EMBSI study		0	0.0013
161	23	trout	diisotridecyl phthalate	12.25	2.396e-11	No	0.004134	0.000184	0.561	0.0112	0.03	0	9	0.042	0.09	0.156	0.55	0.12	13.5	9.6	0.07	NA	0.0427	0.0062							10.61	10.95	10.95	0.56	3.43	0.05	0.05	2e-06	0	1	1	0.9	1.22	1.22	1	Unpublished EMBSI study		0	0.0027
162	24	trout	diundecyl phthalate	11.83	6.676e-11	No	0.003207	0.000159	0.988	0.0198	0.03	0	9	0.0336	0.09	0.156	0.55	0.12	13.7	9.7	0.04	NA	0.0112	0.0045							10.21	10.53	10.53	0.56	2.81	0.05	0.05	2e-06	0	1	1	0.9	1.22	1.22	1	Unpublished EMBSI study		0	0.00043
163	25	trout	hexachlorobenzene	5.73	6.2e-06	No	0.0012001	4.99e-05	0.0363	0.0004	0.015	0	15	0.018	0.09	0.15	0.55	0.12	14.1	9.1	0.11	NA	0.0215	0.0012							4.29	4.43	4.43	0.56	1.45	0.05	0.05	2e-06	0	1	1	0.9	1.22	1.22	1	Unpublished EMBSI study		0	0.00265
164	25	trout	trans-decalin	4.79	0.000889	No	0.0012001	4.99e-05	0.0592	0.0006	0.015	0	15	0.018	0.09	0.15	0.55	0.12	14.1	9.1	0.11	NA	0.0215	0.0012							3.38	3.49	3.49	0.56	1.45	0.05	0.05	2e-06	0	1	1	0.9	1.22	1.22	1	Unpublished EMBSI study		0	0.00141
165	25	trout	dihexyldisulfide	6.78	4.628e-05	No	0.0012001	4.99e-05	0.103	0.001	0.015	0	15	0.018	0.09	0.15	0.55	0.12	14.1	9.1	0.11	NA	0.0215	0.0012							5.31	5.48	5.48	0.56	1.45	0.05	0.05	2e-06	0	1	1	0.9	1.22	1.22	1	Unpublished EMBSI study		0	0.000623
166	25	trout	9-ethylcarbazole	4.27	0.0008113	No	0.0012001	4.99e-05	0.0605	0.0009	0.015	0	15	0.018	0.09	0.15	0.55	0.12	14.1	9.1	0.11	NA	0.0215	0.0012							2.87	2.97	2.97	0.56	1.45	0.05	0.05	2e-06	0	1	1	0.9	1.22	1.22	1	Unpublished EMBSI study		0	0.000284
167	26	trout	1,2,4,5-tetrachlorobenzene	4.64	0.000595	Yes	0.042	0.0023	0.0181	0.000362	0.012	0.002	14	0.067	0.09	0.186	0.466	0.024	12.6	9.9	0.12	NA	0.0066	0.0012	0.545552	0.150895	0.045365	0.015677	2455	358	3.23	3.34	3.34	0.56	18.34	0.05	0.05	2e-06	0	1	1	0.9	1.22	1.22	1	Lo et al. 2015
168	26	trout	pentachlorobenzene	5.17	0.000831	Yes	0.042	0.0023	0.0529	0.00106	0.012	0.002	14	0.067	0.09	0.186	0.466	0.024	12.6	9.9	0.12	NA	0.0066	0.0012	0.564506	0.106215	0.023707	0.001751	2455	358	3.74	3.87	3.87	0.56	18.34	0.05	0.05	2e-06	0	1	1	0.9	1.22	1.22	1	Lo et al. 2015
169	26	trout	hexachlorobenzene	5.73	6.2e-06	Yes	0.042	0.0023	0.0088	0.000176	0.012	0.002	14	0.067	0.09	0.186	0.466	0.024	12.6	9.9	0.12	NA	0.0066	0.0012	0.510608	0.0979729	0.008834	0.001864	2455	358	4.29	4.43	4.43	0.56	18.34	0.05	0.05	2e-06	0	1	1	0.9	1.22	1.22	1	Lo et al. 2015
170	26	trout	2,2',5,5'-PCB (PCB 52)	6.1	1.53e-05	Yes	0.042	0.0023	0.0125	0.00025	0.012	0.002	14	0.067	0.09	0.186	0.466	0.024	12.6	9.9	0.12	NA	0.0066	0.0012	0.398145	0.0784708	0.002765	0.001996	2455	358	4.65	4.8	4.8	0.56	18.34	0.05	0.05	2e-06	0	1	1	0.9	1.22	1.22	1	Lo et al. 2015
171	26	trout	2,2',4,4',6,6'-PCB (PCB 155)	7	4.08e-07	Yes	0.042	0.0023	0.0125	0.00025	0.012	0.002	14	0.067	0.09	0.186	0.466	0.024	12.6	9.9	0.12	NA	0.0066	0.0012	0.437872	0.0864346	0.001175	0.002153	2455	358	5.52	5.7	5.7	0.56	18.34	0.05	0.05	2e-06	0	1	1	0.9	1.22	1.22	1	Lo et al. 2015
172	26	trout	2,2',4,4',5,5'-PCB (PCB 153)	6.9	3.5e-06	Yes	0.042	0.0023	0.0125	0.00025	0.012	0.002	14	0.067	0.09	0.186	0.466	0.024	12.6	9.9	0.12	NA	0.0066	0.0012	0.44181	0.0870386	0.000693	0.002123	2455	358	5.42	5.6	5.6	0.56	18.34	0.05	0.05	2e-06	0	1	1	0.9	1.22	1.22	1	Lo et al. 2015
173	26	trout	2,2',3,3',4,4',5,5',6,6'-PCB (PCB 209)	8.26	7.43e-09	Yes	0.042	0.0023	0.0125	0.00025	0.012	0.002	14	0.067	0.09	0.186	0.466	0.024	12.6	9.9	0.12	NA	0.0066	0.0012	0.313737	0.061446	0.001092	0.002127	2455	358	6.74	6.96	6.96	0.56	18.34	0.05	0.05	2e-06	0	1	1	0.9	1.22	1.22	1	Lo et al. 2015
174	26	trout	1,2,3,4-tetramethylbenzene	4	0.03394	Yes	0.042	0.0023	0.12	0.0024	0.012	0.002	14	0.067	0.09	0.186	0.466	0.024	12.6	9.9	0.12	NA	0.0066	0.0012	0.5263	0.0276969	0.2479	0.0350443	2455	358	2.61	2.7	2.7	0.56	18.34	0.05	0.05	2e-06	0	1	1	0.9	1.22	1.22	1	Lo et al. 2015
175	26	trout	trans-decalin	4.79	0.000889	Yes	0.042	0.0023	0.499	0.00998	0.012	0.002	14	0.067	0.09	0.186	0.466	0.024	12.6	9.9	0.12	NA	0.0066	0.0012	0.52622	0.0276768	0.0422154	0.0052127	2455	358	3.38	3.49	3.49	0.56	18.34	0.05	0.05	2e-06	0	1	1	0.9	1.22	1.22	1	Lo et al. 2015
176	26	trout	9-methylanthracene	5.07	0.000261	Yes	0.042	0.0023	0.129	0.00258	0.012	0.002	14	0.067	0.09	0.186	0.466	0.024	12.6	9.9	0.12	NA	0.0066	0.0012	0.526134	0.027655	0.0232954	0.0026589	2455	358	3.65	3.77	3.77	0.56	18.34	0.05	0.05	2e-06	0	1	1	0.9	1.22	1.22	1	Lo et al. 2015
177	26	trout	chrysene	5.81	2.725e-06	Yes	0.042	0.0023	0.0282	0.000564	0.012	0.002	14	0.067	0.09	0.186	0.466	0.024	12.6	9.9	0.12	NA	0.0066	0.0012	0.525316	0.0274511	0.00620234	0.0014137	2455	358	4.37	4.51	4.51	0.56	18.34	0.05	0.05	2e-06	0	1	1	0.9	1.22	1.22	1	Lo et al. 2015
178	26	trout	n-hexylcyclohexane	6.05	0.0001242	Yes	0.042	0.0023	0.488	0.00976	0.012	0.002	14	0.067	0.09	0.186	0.466	0.024	12.6	9.9	0.12	NA	0.0066	0.0012	0.524581	0.0272698	0.00458802	0.00147031	2455	358	4.6	4.75	4.75	0.56	18.34	0.05	0.05	2e-06	0	1	1	0.9	1.22	1.22	1	Lo et al. 2015
179	26	trout	2,6-dimethyldecane	6.09	0.0001126	Yes	0.042	0.0023	0.476	0.00952	0.012	0.002	14	0.067	0.09	0.186	0.466	0.024	12.6	9.9	0.12	NA	0.0066	0.0012	0.524414	0.027229	0.0043955	0.00147942	2455	358	4.64	4.79	4.79	0.56	18.34	0.05	0.05	2e-06	0	1	1	0.9	1.22	1.22	1	Lo et al. 2015
180	26	trout	benzo[a]pyrene	6.13	1.62e-06	Yes	0.042	0.0023	0.0278	0.000556	0.012	0.002	14	0.067	0.09	0.186	0.466	0.024	12.6	9.9	0.12	NA	0.0066	0.0012	0.524232	0.0271844	0.00421992	0.00148814	2455	358	4.68	4.83	4.83	0.56	18.34	0.05	0.05	2e-06	0	1	1	0.9	1.22	1.22	1	Lo et al. 2015
181	27	carp	hexachlorobenzene	5.73	6.2e-06	No	0.003433	0.000238	0.0283	0.0006	0.03	0	11	0.0359	0.09	0.156	0.55	0.12	25	7.2	0.08	NA	0.022	0.0025							4.29	4.43	4.43	0.56	3.98	0.05	0.05	2e-06	0	1	1	0.9	1.22	1.22	1	Unpublished EMBSI study		0	0.0012
182	27	carp	2,2,4,4,6,8,8-heptamethylnonane	7.79	2.1869e-06	No	0.003433	0.000238	0.0804	0.0024	0.03	0	11	0.0359	0.09	0.156	0.55	0.12	25	7.2	0.08	NA	0.022	0.0025							6.29	6.49	6.49	0.56	3.98	0.05	0.05	2e-06	0	1	1	0.9	1.22	1.22	1	Unpublished EMBSI study		0	0.00044
183	27	carp	2-isopropyldecalin	5.52	0.0003061	No	0.003433	0.000238	0.0468	0.0013	0.03	0	11	0.0359	0.09	0.156	0.55	0.12	25	7.2	0.08	NA	0.022	0.0025							4.08	4.22	4.22	0.56	3.98	0.05	0.05	2e-06	0	1	1	0.9	1.22	1.22	1	Unpublished EMBSI study		0	0.00026
184	27	carp	n-octylbenzene	6.3	6.6e-05	No	0.003433	0.000238	0.0957	0.0022	0.03	0	11	0.0359	0.09	0.156	0.55	0.12	25	7.2	0.08	NA	0.022	0.0025							4.84	5	5	0.56	3.98	0.05	0.05	2e-06	0	1	1	0.9	1.22	1.22	1	Unpublished EMBSI study		0	0.00033
185	27	carp	4-ethylbiphenyl	4.8	0.004311	No	0.003433	0.000238	0.0921	0.0021	0.03	0	11	0.0359	0.09	0.156	0.55	0.12	25	7.2	0.08	NA	0.022	0.0025							3.39	3.5	3.5	0.56	3.98	0.05	0.05	2e-06	0	1	1	0.9	1.22	1.22	1	Unpublished EMBSI study		0	0.00027
186	27	carp	2,7-diisopropylnaphthalene	6.08	0.0002421	No	0.003433	0.000238	0.0541	0.0013	0.03	0	11	0.0359	0.09	0.156	0.55	0.12	25	7.2	0.08	NA	0.022	0.0025							4.63	4.78	4.78	0.56	3.98	0.05	0.05	2e-06	0	1	1	0.9	1.22	1.22	1	Unpublished EMBSI study		0	0.00032
187	27	carp	anthracene	4.45	4.34e-05	No	0.003433	0.000238	0.098	0.0022	0.03	0	11	0.0359	0.09	0.156	0.55	0.12	25	7.2	0.08	NA	0.022	0.0025							3.05	3.15	3.15	0.56	3.98	0.05	0.05	2e-06	0	1	1	0.9	1.22	1.22	1	Unpublished EMBSI study		0	0.00027
188	27	carp	o-terphenyl	5.52	0.00124	No	0.003433	0.000238	0.077	0.0017	0.03	0	11	0.0359	0.09	0.156	0.55	0.12	25	7.2	0.08	NA	0.022	0.0025							4.08	4.22	4.22	0.56	3.98	0.05	0.05	2e-06	0	1	1	0.9	1.22	1.22	1	Unpublished EMBSI study		0	0.00059
189	27	carp	fluoranthene	5.16	0.00026	No	0.003433	0.000238	0.0883	0.0017	0.03	0	11	0.0359	0.09	0.156	0.55	0.12	25	7.2	0.08	NA	0.022	0.0025							3.74	3.86	3.86	0.56	3.98	0.05	0.05	2e-06	0	1	1	0.9	1.22	1.22	1	Unpublished EMBSI study		0	0.0002
190	27	carp	benzo[b]fluorene	5.77	4e-06	No	0.003433	0.000238	0.0496	0.0009	0.03	0	11	0.0359	0.09	0.156	0.55	0.12	25	7.2	0.08	NA	0.022	0.0025							4.33	4.47	4.47	0.56	3.98	0.05	0.05	2e-06	0	1	1	0.9	1.22	1.22	1	Unpublished EMBSI study		0	0.00012
191	27	carp	triphenylene	5.49	4.11e-05	No	0.003433	0.000238	0.0932	0.0017	0.03	0	11	0.0359	0.09	0.156	0.55	0.12	25	7.2	0.08	NA	0.022	0.0025							4.06	4.19	4.19	0.56	3.98	0.05	0.05	2e-06	0	1	1	0.9	1.22	1.22	1	Unpublished EMBSI study		0	0.00037
192	27	carp	7-methylbenz[a]anthracene	6.07	1.1e-05	No	0.003433	0.000238	0.0481	0.0008	0.03	0	11	0.0359	0.09	0.156	0.55	0.12	25	7.2	0.08	NA	0.022	0.0025							4.62	4.77	4.77	0.56	3.98	0.05	0.05	2e-06	0	1	1	0.9	1.22	1.22	1	Unpublished EMBSI study		0	0.0001
193	27	carp	benzo[k]fluoranthene	6.11	8e-07	No	0.003433	0.000238	0.0485	0.0008	0.03	0	11	0.0359	0.09	0.156	0.55	0.12	25	7.2	0.08	NA	0.022	0.0025							4.66	4.81	4.81	0.56	3.98	0.05	0.05	2e-06	0	1	1	0.9	1.22	1.22	1	Unpublished EMBSI study		0	0.00011
194	28	fathead minnow	2,2,4,6,6-pentamethylheptane	5.94	0.0001508	No	0.000451	5e-05	1.035	0.0207	0.04	0	9	0.094	0.09	0.156	0.55	0.12	20.4	8.9	0.02	NA	0.0035	0.0115							4.49	4.64	4.64	0.56	0.72	0.05	0.05	2e-06	0	1	1	0.9	1.22	1.22	1	Unpublished EMBSI study		0	0.00467
195	29	trout	hexachlorobenzene	5.73	6.2e-06	No	0.0041	0	0.0001026	5.6e-06	0.015	0	30	0.041	0.09	0.14	0.41	0.1	10	10.476	0	NA	0.0104	0.0015							4.29	4.43	4.43	0.56	3.12	0.05	0.05	2e-06	0	1	1	0.9	1.22	1.22	1	Fisk et al. 1998
196	29	trout	mirex	6.89	8.5e-05	No	0.0041	0	0.0001446	4.4e-06	0.015	0	30	0.041	0.09	0.14	0.41	0.1	10	10.476	0	NA	0.0104	0.0015							5.41	5.59	5.59	0.56	3.12	0.05	0.05	2e-06	0	1	1	0.9	1.22	1.22	1	Fisk et al. 1998
197	29	trout	2,2',5-PCB (PCB 18)	5.6	0.0004	No	0.0041	0	0.000182	1.14e-05	0.015	0	30	0.041	0.09	0.14	0.41	0.1	10	10.476	0	NA	0.0104	0.0015							4.16	4.3	4.3	0.56	3.12	0.05	0.05	2e-06	0	1	1	0.9	1.22	1.22	1	Fisk et al. 1998
198	29	trout	2,4,4'-PCB (PCB 28)	5.8	0.000345	No	0.0041	0	0.0001081	8.8e-06	0.015	0	30	0.041	0.09	0.14	0.41	0.1	10	10.476	0	NA	0.0104	0.0015							4.36	4.5	4.5	0.56	3.12	0.05	0.05	2e-06	0	1	1	0.9	1.22	1.22	1	Fisk et al. 1998
199	29	trout	2,2',3,5'-PCB (PCB 44)	6	0.0001	No	0.0041	0	0.000129	6.7e-06	0.015	0	30	0.041	0.09	0.14	0.41	0.1	10	10.476	0	NA	0.0104	0.0015							4.55	4.7	4.7	0.56	3.12	0.05	0.05	2e-06	0	1	1	0.9	1.22	1.22	1	Fisk et al. 1998
200	29	trout	2,2',5,5'-PCB (PCB 52)	6.1	1.53e-05	No	0.0041	0	0.000125	6.9e-06	0.015	0	30	0.041	0.09	0.14	0.41	0.1	10	10.476	0	NA	0.0104	0.0015							4.65	4.8	4.8	0.56	3.12	0.05	0.05	2e-06	0	1	1	0.9	1.22	1.22	1	Fisk et al. 1998
201	29	trout	2,3',4,4'-PCB (PCB 66)	5.8	3.68e-05	No	0.0041	0	0.000158	7.8e-06	0.015	0	30	0.041	0.09	0.14	0.41	0.1	10	10.476	0	NA	0.0104	0.0015							4.36	4.5	4.5	0.56	3.12	0.05	0.05	2e-06	0	1	1	0.9	1.22	1.22	1	Fisk et al. 1998
202	29	trout	2,2',4,5,5'-PCB (PCB 101)	6.4	1.54e-05	No	0.0041	0	0.000148	1.4e-05	0.015	0	30	0.041	0.09	0.14	0.41	0.1	10	10.476	0	NA	0.0104	0.0015							4.94	5.1	5.1	0.56	3.12	0.05	0.05	2e-06	0	1	1	0.9	1.22	1.22	1	Fisk et al. 1998
203	29	trout	2,3,3',4,4'-PCB (PCB 105)	6	3.4e-06	No	0.0041	0	0.000133	3.4e-06	0.015	0	30	0.041	0.09	0.14	0.41	0.1	10	10.476	0	NA	0.0104	0.0015							4.55	4.7	4.7	0.56	3.12	0.05	0.05	2e-06	0	1	1	0.9	1.22	1.22	1	Fisk et al. 1998
204	29	trout	2,3',4,4',5-PCB (PCB 118)	6.74	1.34e-05	No	0.0041	0	0.000133	9.1e-06	0.015	0	30	0.041	0.09	0.14	0.41	0.1	10	10.476	0	NA	0.0104	0.0015							5.27	5.44	5.44	0.56	3.12	0.05	0.05	2e-06	0	1	1	0.9	1.22	1.22	1	Fisk et al. 1998
205	29	trout	2,2',3,3',4,4'-PCB (PCB 128)	7	3.5e-07	No	0.0041	0	9.94e-05	2.7e-06	0.015	0	30	0.041	0.09	0.14	0.41	0.1	10	10.476	0	NA	0.0104	0.0015							5.52	5.7	5.7	0.56	3.12	0.05	0.05	2e-06	0	1	1	0.9	1.22	1.22	1	Fisk et al. 1998
206	29	trout	2,2',3,4,4',5'-PCB (PCB 138)	6.83	1.5e-06	No	0.0041	0	0.000176	7e-06	0.015	0	30	0.041	0.09	0.14	0.41	0.1	10	10.476	0	NA	0.0104	0.0015							5.36	5.53	5.53	0.56	3.12	0.05	0.05	2e-06	0	1	1	0.9	1.22	1.22	1	Fisk et al. 1998
207	29	trout	2,2',4,4',5,5'-PCB (PCB 153)	6.9	3.5e-06	No	0.0041	0	0.000124	5.7e-06	0.015	0	30	0.041	0.09	0.14	0.41	0.1	10	10.476	0	NA	0.0104	0.0015							5.42	5.6	5.6	0.56	3.12	0.05	0.05	2e-06	0	1	1	0.9	1.22	1.22	1	Fisk et al. 1998
208	29	trout	2,2',3,4',5,5',6-PCB (PCB 187)	7.17	4.51e-06	No	0.0041	0	0.000122	5.1e-06	0.015	0	30	0.041	0.09	0.14	0.41	0.1	10	10.476	0	NA	0.0104	0.0015							5.68	5.87	5.87	0.56	3.12	0.05	0.05	2e-06	0	1	1	0.9	1.22	1.22	1	Fisk et al. 1998
209	29	trout	2,3,3',4,4',5,5'-PCB (PCB 189)	7.71	7.53e-07	No	0.0041	0	0.000138	2.5e-06	0.015	0	30	0.041	0.09	0.14	0.41	0.1	10	10.476	0	NA	0.0104	0.0015							6.21	6.41	6.41	0.56	3.12	0.05	0.05	2e-06	0	1	1	0.9	1.22	1.22	1	Fisk et al. 1998
210	29	trout	2,2',3,3',4,4',5,6-PCB (PCB 195)	7.56	2.2e-07	No	0.0041	0	0.000176	3.1e-06	0.015	0	30	0.041	0.09	0.14	0.41	0.1	10	10.476	0	NA	0.0104	0.0015							6.06	6.26	6.26	0.56	3.12	0.05	0.05	2e-06	0	1	1	0.9	1.22	1.22	1	Fisk et al. 1998
211	29	trout	2,2',3,3',4,4',5,5',6-PCB (PCB 206)	7.2	2.5e-08	No	0.0041	0	0.000141	3e-06	0.015	0	30	0.041	0.09	0.14	0.41	0.1	10	10.476	0	NA	0.0104	0.0015							5.71	5.9	5.9	0.56	3.12	0.05	0.05	2e-06	0	1	1	0.9	1.22	1.22	1	Fisk et al. 1998
212	29	trout	2,2',3,3',4,4',5,5',6,6'-PCB (PCB 209)	8.26	7.43e-09	No	0.0041	0	0.000688	5.64e-05	0.015	0	30	0.041	0.09	0.14	0.41	0.1	10	10.476	0	NA	0.0104	0.0015							6.74	6.96	6.96	0.56	3.12	0.05	0.05	2e-06	0	1	1	0.9	1.22	1.22	1	Fisk et al. 1998
213	29	trout	Tris(4-chlorophenyl)methane (TCPMe)	7.3	3.731e-06	No	0.0041	0	0.000185	3.2e-06	0.015	0	30	0.041	0.09	0.14	0.41	0.1	10	10.476	0	NA	0.0104	0.0015							5.81	6	6	0.56	3.12	0.05	0.05	2e-06	0	1	1	0.9	1.22	1.22	1	Fisk et al. 1998
214	29	trout	Tris(4-chlorophenyl)methanol (TCPMeOH)	6.31	6.721e-05	No	0.0041	0	0.0002761	4.9e-06	0.015	0	30	0.041	0.09	0.14	0.41	0.1	10	10.476	0	NA	0.0104	0.0015							4.85	5.01	5.01	0.56	3.12	0.05	0.05	2e-06	0	1	1	0.9	1.22	1.22	1	Fisk et al. 1998
215	30	guppies	2,2',5,5'-PCB (PCB 52)	6.1	1.53e-05	No	1.91e-05	1.5e-06	0.00958	0.000192	0.0357143	0	210	0.061	0.09	0.076	0.55	0.1	20	8.316	0	NA	0.0039	0.0003							4.65	4.8	4.8	0.56	0.08	0.05	0.05	2e-06	0	1	1	0.9	1.22	1.22	1	Sijm et al. 1992
216	30	guppies	2,2',5,5'-PCB (PCB 52)	6.1	1.53e-05	No	3.09e-05	2.4e-06	0.00774	0.000155	0.0314286	0	210	0.061	0.09	0.076	0.55	0.1	20	8.316	0	NA	0.0024	0.0003							4.65	4.8	4.8	0.56	0.11	0.05	0.05	2e-06	0	1	1	0.9	1.22	1.22	1	Sijm et al. 1992
217	30	guppies	3,3',5,5'-PCB (PCB 80)	6.48	1.23e-06	No	1.91e-05	1.5e-06	0.00694	0.000139	0.0357143	0	210	0.061	0.09	0.076	0.55	0.1	20	8.316	0	NA	0.0039	0.0003							5.02	5.18	5.18	0.56	0.08	0.05	0.05	2e-06	0	1	1	0.9	1.22	1.22	1	Sijm et al. 1992
218	30	guppies	2,2',3,3',6,6'-PCB (PCB 136)	6.7	4.51e-06	No	3.09e-05	2.4e-06	0.00692	0.000138	0.0314286	0	210	0.061	0.09	0.076	0.55	0.1	20	8.316	0	NA	0.0024	0.0003							5.23	5.4	5.4	0.56	0.11	0.05	0.05	2e-06	0	1	1	0.9	1.22	1.22	1	Sijm et al. 1992
219	30	guppies	2,2',4,4',5,5'-PCB (PCB 153)	6.9	3.5e-06	No	1.91e-05	1.5e-06	0.00614	0.000123	0.0357143	0	210	0.061	0.09	0.076	0.55	0.1	20	8.316	0	NA	0.0039	0.0003							5.42	5.6	5.6	0.56	0.08	0.05	0.05	2e-06	0	1	1	0.9	1.22	1.22	1	Sijm et al. 1992
220	30	guppies	2,2',3,3',4,4',5,5'-PCB (PCB 194)	7.4	2.72e-07	No	1.91e-05	1.5e-06	0.00809	0.000162	0.0357143	0	210	0.061	0.09	0.076	0.55	0.1	20	8.316	0	NA	0.0039	0.0003							5.91	6.1	6.1	0.56	0.08	0.05	0.05	2e-06	0	1	1	0.9	1.22	1.22	1	Sijm et al. 1992
221	30	guppies	2,2',3,3',4,4',5,5',6,6'-PCB (PCB 209)	8.26	7.43e-09	No	1.91e-05	1.5e-06	0.00975	0.000195	0.0357143	0	210	0.061	0.09	0.076	0.55	0.1	20	8.316	0	NA	0.0039	0.0003							6.74	6.96	6.96	0.56	0.08	0.05	0.05	2e-06	0	1	1	0.9	1.22	1.22	1	Sijm et al. 1992
222	30	guppies	2,2',3,3',4,4',5,5',6,6'-PCB (PCB 209)	8.26	7.43e-09	No	3.09e-05	2.4e-06	0.00934	0.000187	0.0314286	0	210	0.061	0.09	0.076	0.55	0.1	20	8.316	0	NA	0.0024	0.0003							6.74	6.96	6.96	0.56	0.11	0.05	0.05	2e-06	0	1	1	0.9	1.22	1.22	1	Sijm et al. 1992
223	31	carp	2,4,4'-Tribromodiphenyl ether (BDE 28)	5.88	2.642e-05	No	0.03	0	9.6e-05	3e-06	0.0333333	0	60	0.059	0.09	0.15	0.55	0.1	22	7.884	0	NA	0.0087	0.0002							4.43	4.58	4.58	0.56	17.97	0.05	0.05	2e-06	0	1	1	0.9	1.22	1.22	1	Stapleton et al. 2004
224	31	carp	2,2',4,4'-Tetrabromodiphenyl ether (BDE 47)	6.77	1.461e-06	No	0.03	0	0.000174	7e-06	0.0333333	0	60	0.059	0.09	0.15	0.55	0.1	22	7.884	0	NA	0.0087	0.0002							5.3	5.47	5.47	0.56	17.97	0.05	0.05	2e-06	0	1	1	0.9	1.22	1.22	1	Stapleton et al. 2004
225	32	carp	4,4'-methylenebis-2,6-di-tert-butylphenol (Binox M)	8.99	1.707e-07	No	0.00323	0.00020871	0.0952	0.0011	0.03	0	10	0.0451	0.09	0.154	0.55	0.1	25	7.8	0	NA	0.0231	0.003							7.45	7.69	7.69	0.56	3.51	0.05	0.05	2e-06	0	1	1	0.9	1.22	1.22	1	Inoue et al. 2012
226	32	carp	hexachlorobenzene	5.73	6.2e-06	No	0.00323	0.00020871	0.0968	0.0007	0.03	0	10	0.0451	0.09	0.154	0.55	0.1	25	7.8	0	NA	0.0231	0.003							4.29	4.43	4.43	0.56	3.51	0.05	0.05	2e-06	0	1	1	0.9	1.22	1.22	1	Inoue et al. 2012
227	32	carp	pentachlorobenzene	5.17	0.000831	No	0.00323	0.00020871	0.1	0.002	0.03	0	10	0.0448	0.09	0.154	0.55	0.1	25	7.8	0	NA	0.0171	0.0068							3.74	3.87	3.87	0.56	3.51	0.05	0.05	2e-06	0	1	1	0.9	1.22	1.22	1	Inoue et al. 2012
228	32	carp	hexachlorobenzene	5.73	6.2e-06	No	0.00323	0.00020871	0.106	0.003	0.03	0	10	0.0448	0.09	0.154	0.55	0.1	25	7.8	0	NA	0.0171	0.0068							4.29	4.43	4.43	0.56	3.51	0.05	0.05	2e-06	0	1	1	0.9	1.22	1.22	1	Inoue et al. 2012
229	32	carp	2,4-dichloro-1-(4-nitrophenoxy) benzene	4.64	0.001	No	0.00323	0.00020871	0.104	0.006	0.03	0	10	0.0534	0.09	0.154	0.55	0.1	25	7.8	0	NA	0.0291	0.006							3.23	3.34	3.34	0.56	3.51	0.05	0.05	2e-06	0	1	1	0.9	1.22	1.22	1	Inoue et al. 2012
230	32	carp	hexachlorobenzene	5.73	6.2e-06	No	0.00323	0.00020871	0.0941	0.0026	0.03	0	10	0.0534	0.09	0.154	0.55	0.1	25	7.8	0	NA	0.0291	0.006							4.29	4.43	4.43	0.56	3.51	0.05	0.05	2e-06	0	1	1	0.9	1.22	1.22	1	Inoue et al. 2012
231	32	carp	1,4-bis(isopropylamino)anthraquinone	6.07	0.00021078	No	0.00323	0.00020871	0.0981	0.0018	0.03	0	10	0.0484	0.09	0.154	0.55	0.1	25	7.8	0	NA	0.0298	0.0223							4.62	4.77	4.77	0.56	3.51	0.05	0.05	2e-06	0	1	1	0.9	1.22	1.22	1	Inoue et al. 2012
232	32	carp	hexachlorobenzene	5.73	6.2e-06	No	0.00323	0.00020871	0.101	0.003	0.03	0	10	0.0484	0.09	0.154	0.55	0.1	25	7.8	0	NA	0.0298	0.0223							4.29	4.43	4.43	0.56	3.51	0.05	0.05	2e-06	0	1	1	0.9	1.22	1.22	1	Inoue et al. 2012
233	32	carp	N,N'-di-2-naphthyl-p-phenylenediamine	6.07	0.004586	No	0.00323	0.00020871	0.114	0.012	0.03	0	10	0.0483	0.09	0.154	0.55	0.1	25	7.8	0	NA	0.0288	0.0215							4.62	4.77	4.77	0.56	3.51	0.05	0.05	2e-06	0	1	1	0.9	1.22	1.22	1	Inoue et al. 2012
234	32	carp	hexachlorobenzene	5.73	6.2e-06	No	0.00323	0.00020871	0.103	0.002	0.03	0	10	0.0483	0.09	0.154	0.55	0.1	25	7.8	0	NA	0.0288	0.0215							4.29	4.43	4.43	0.56	3.51	0.05	0.05	2e-06	0	1	1	0.9	1.22	1.22	1	Inoue et al. 2012
235	32	carp	musk xylene	4.45	0.0008214	No	0.00323	0.00020871	0.0451	0.0023	0.03	0	10	0.0675	0.09	0.154	0.55	0.1	25	7.8	0	NA	0.0238	0.0033							3.05	3.15	3.15	0.56	3.51	0.05	0.05	2e-06	0	1	1	0.9	1.22	1.22	1	Inoue et al. 2012
236	32	carp	o-terphenyl	5.52	0.00124	No	0.00323	0.00020871	0.0452	0.0015	0.03	0	10	0.0675	0.09	0.154	0.55	0.1	25	7.8	0	NA	0.0238	0.0033							4.08	4.22	4.22	0.56	3.51	0.05	0.05	2e-06	0	1	1	0.9	1.22	1.22	1	Inoue et al. 2012
237	32	carp	methoxychlor	5.08	0.0001	No	0.00323	0.00020871	0.0882	0.0024	0.03	0	10	0.0675	0.09	0.154	0.55	0.1	25	7.8	0	NA	0.0238	0.0033							3.66	3.78	3.78	0.56	3.51	0.05	0.05	2e-06	0	1	1	0.9	1.22	1.22	1	Inoue et al. 2012
238	32	carp	hexachlorobenzene	5.73	6.2e-06	No	0.00323	0.00020871	0.0241	0.0009	0.03	0	10	0.0675	0.09	0.154	0.55	0.1	25	7.8	0	NA	0.0238	0.0033							4.29	4.43	4.43	0.56	3.51	0.05	0.05	2e-06	0	1	1	0.9	1.22	1.22	1	Inoue et al. 2012
[truncated: 138 more columns]

## Sheet: Output Data
				Part 7: Evaluate Bioaccumulation Metrics																																								Part 8: Evaluate Supplemental Information
No	Study #	Species	Chemical name	ED,R	SE(ED,R)	kBT,R	SE(kBT,R)	ED	SE(ED)	kD	SE(kD)	kBT	SE(kBT)	kB1	SE(kB1)	kB1t	SE(kB1t)	kB2	SE(kB2)	kBG	SE(kBG)	kBM	SE(kBM)		kGB	SE(kGB)	kGE	SE(kGE)	kBE	SE(kBE)	kGM	SE(kGM)		BMF	SE(BMF)	BMFL	SE(BMFL)	BCFww,t	SE(BCFww,t)	BCFL,t	SE(BCFL,t)	BCF5%,t	SE(BCF5%,t)	LB	LD	CWD	CB	CG	CBL
				Unitless		1/d		Unitless		kg food/kg fish ww/d		1/d		L water/kg fish ww/d		L water/kg fish ww/d		1/d		1/d		1/d			1/d		1/d		1/d		1/d			kg food dw/kg fish ww		kg lipid/kg lipid		L water/kg fish ww		L water/kg lipid		L water/kg fish ww		kg lipid/kg fish body	kg lipid/kg diet	g chemical/L water	g chemical/kg fish ww	g chemical/kg digesta	g chemical/kg lipid
1	1	trout	hexachlorobenzene	0.5255	0.0275	0.0764	0.0055	1.1967	0.1183	0.0359	0.0035	0.0767	0.0093	669.01	33.45	644.01	32.2	0.0358	0.0018	0.0254	0.0028	0.0003	0.0129		0.8798	0.097	0.7944	0	0.0121	0.0031	0	0.0744	ID	0.4679	0.0279	2.7668	0.1651	8393	1102.1	258232	33909.9	12911.6	1695.5	0.033	0.192	0	0.0168	0.141	0.517
2	1	trout	2,6-dimethyldecane	0.5244	0.0272	0.0846	0.005	0.0775	0.014	0.0023	0.0004	0.2221	0.0189	669.07	33.46	615.66	30.79	0.0156	0.0008	0.0253	0.0028	0.1375	0.0199		0.876	0.0956	0.7944	0	0.0234	0.0026	9.6333	2.3335		0.0105	0.0012	0.0619	0.0071	2772	274.3	85291.1	8440.5	4264.6	422	0.033	0.192	0	0.00101	0.0178	0.031
3	1	trout	2,3-dimethylheptane	0.5263	0.0277	0.5323	0.024	0.372	0.0686	0.0112	0.0021	0.2912	0.0201	667.72	33.28	665.6	33.18	0.4707	0.0235	0.0255	0.0028	0	0.0322	ID	0.8825	0.098	0.7944	0	0.016	0.0025	0.6954	0.4678		0.0383	0.005	0.2265	0.0297	2285.5	195.2	70277.8	6002.8	3513.9	300.1	0.033	0.192	0	0.00165	0.07	0.0509
4	1	trout	1-methylphenanthrene	0.5261	0.0277	0.23	0.0095	0.0338	0.0147	0.001	0.0004	0.3881	0.096	668.64	33.4	662.62	33.1	0.1598	0.008	0.0255	0.0028	0.1581	0.0968		0.8821	0.0978	0.7944	0	0.0246	0.0028	24.4417	11.7428		0.0026	0.0006	0.0154	0.0033	1707.3	432.3	52519.6	13297.9	2626	664.9	0.033	0.192	0	0.000339	0.0103	0.0104
5	1	trout	n-dodecane	0.5244	0.0272	0.0802	0.0049	0.2355	0.0369	0.0071	0.0011	0.2213	0.0164	669.07	33.46	614.55	30.73	0.0153	0.0008	0.0253	0.0028	0.1411	0.0179		0.8759	0.0956	0.7944	0	0.0194	0.0023	2.0487	0.6608		0.0319	0.0032	0.1888	0.019	2777	249	85443.9	7661	4272.2	383.1	0.033	0.192	0	0.00319	0.0571	0.0982
6	1	trout	n-nonane	0.5256	0.0275	0.107	0.0054	0.2768	0.061	0.0083	0.0018	0.4198	0.0381	668.99	33.45	647.95	32.4	0.043	0.0022	0.0254	0.0028	0.3128	0.0398		0.8803	0.0972	0.7944	0	0.0184	0.0026	1.505	0.7448		0.0198	0.0028	0.117	0.0168	1543.3	160.3	47484	4931.2	2374.2	246.6	0.033	0.192	0	0.00174	0.0583	0.0536
7	1	trout	phenanthrene	0.5263	0.0277	0.731	0.0334	0.1657	0.0455	0.005	0.0014	0.4466	0.0484	667.14	33.21	665.62	33.13	0.6641	0.0331	0.0255	0.0028	0	0.0597	ID	0.8826	0.098	0.7944	0	0.0213	0.0026	3.6503	1.5447		0.0111	0.002	0.0658	0.0121	1490.5	178.3	45819.5	5479.8	2291	274	0.033	0.192	0	0.000714	0.041	0.0219
8	1	trout	2,2,4,6,6-pentamethylheptane	0.525	0.0274	0.0891	0.005	0.1556	0.0329	0.0047	0.001	0.1849	0.0217	669.05	33.46	629.96	31.5	0.0221	0.0011	0.0254	0.0028	0.0958	0.023		0.878	0.0963	0.7944	0	0.0214	0.0025	3.9699	1.3023		0.0252	0.0031	0.1493	0.0185	3406.4	435.8	104810	13409.5	5240.5	670.5	0.033	0.192	0	0.00237	0.0351	0.0728
9	1	trout	trans-decalin	0.5262	0.0277	0.3616	0.0163	0.814	0.1045	0.0244	0.0031	0.2045	0.0132	668.19	33.34	665.03	33.19	0.3113	0.0155	0.0255	0.0028	0	0.0224	ID	0.8824	0.098	0.7944	0	0.0121	0.0027	0	0.141	ID	0.1194	0.0096	0.7059	0.0565	3251.9	266.4	100016	8194.4	5000.8	409.7	0.033	0.192	0	0.00428	0.128	0.132
10	1	trout	1,3,5-trimethylbenzene	0.5263	0.0277	7.08	0.3366	0.1145	0.0518	0.0034	0.0016	0.8066	0.1825	648.01	31.1	647.87	31.09	7.012	0.3365	0.0253	0.0028	0	0.3834	ID	0.8827	0.0981	0.7944	0	0.0224	0.0028	6.0343	3.5696		0.0043	0.0011	0.0249	0.0062	803.2	186.4	24462.2	5676.3	1223.1	283.8	0.033	0.192	0	4.9e-05	0.0271	0.00149
11	1	trout	1,3,5-trimethylcyclohexane	0.5263	0.0277	0.7696	0.0357	0.5067	0.0788	0.0152	0.0024	0.2876	0.0169	667	33.19	665.58	33.12	0.7114	0.0354	0.0255	0.0028	0	0.0403	ID	0.8826	0.098	0.7944	0	0.0126	0.0024	0.0648	0.2872		0.0529	0.0058	0.3123	0.0344	2314.2	178.5	71133.9	5487.7	3556.7	274.4	0.033	0.192	0	0.00158	0.0967	0.0486
12	2	trout	hexachlorobenzene	0.5255	0.0275	0.0552	0.0026	0.6828	0.0404	0.0205	0.0012	0.0578	0.0035	537.4	28.67	517.32	27.6	0.0177	0.0009	0.0156	0.0017	0.0026	0.0048		0.8798	0.097	0.7944	0	0.0074	0.0008	0	0.0885	ID	0.3543	0.0129	1.3047	0.0476	8948.7	726.1	171426	13910	8571.3	695.5	0.052	0.192	0	0.00693	0.0372	0.133
13	2	trout	3,5,5-trimethylcyclohexene	0.5263	0.0277	0.572	0.0283	0.4073	0.1157	0.0122	0.0035	0.5797	0.0544	534.91	28.36	534.15	28.32	0.5302	0.0281	0.0156	0.0017	0.0076	0.0627		0.8826	0.098	0.7944	0	0.0093	0.0021	0.49	0.6322		0.0211	0.0044	0.0775	0.0163	921.5	99.5	17636.5	1905.1	881.8	95.3	0.052	0.192	0	0.00181	0.0828	0.0346
14	2	trout	2,4,6-trimethyl-3-heptene	0.5262	0.0277	0.1516	0.0063	0.1847	0.0561	0.0055	0.0017	0.2323	0.0282	536.97	28.62	533.35	28.43	0.1063	0.0057	0.0156	0.0017	0.0807	0.0296		0.8822	0.0979	0.7944	0	0.0128	0.0017	3.1003	1.5133		0.0238	0.0051	0.0878	0.0186	2295.6	304.9	43969.4	5840.3	2198.5	292	0.052	0.192	0	0.00187	0.0344	0.0358
15	2	trout	cis-1,1,3,5-tetramethylcyclohexane	0.5262	0.0277	0.1654	0.0071	0.4905	0.06	0.0147	0.0018	0.1212	0.008	536.88	28.61	533.78	28.44	0.1248	0.0067	0.0157	0.0017	0	0.0113	ID	0.8823	0.0979	0.7944	0	0.008	0.0013	0.1222	0.2424		0.1214	0.0092	0.4471	0.0338	4405.8	374.5	84384.3	7173.3	4219.2	358.7	0.052	0.192	0	0.0077	0.104	0.148
16	2	trout	1-decene	0.5255	0.0275	0.0658	0.003	0.0848	0.0401	0.0025	0.0012	0.2245	0.0437	537.4	28.67	518.57	27.67	0.0189	0.001	0.0156	0.0017	0.1587	0.0443		0.88	0.0971	0.7944	0	0.0143	0.0017	8.6985	5.0143		0.0113	0.0037	0.0417	0.0136	2310	467.4	44252	8953.9	2212.6	447.7	0.052	0.192	0	0.00103	0.0183	0.0198
17	2	trout	iso-butylcyclohexane	0.5262	0.0277	0.138	0.006	0.4582	0.1178	0.0137	0.0035	0.2342	0.0183	537.02	28.62	533.05	28.41	0.0969	0.0052	0.0156	0.0017	0.0962	0.0206		0.8822	0.0979	0.7944	0	0.0085	0.0021	0.2488	0.5084		0.0587	0.0116	0.2161	0.0427	2276.3	215.4	43599.9	4126.2	2180	206.3	0.052	0.192	0	0.00533	0.101	0.102
18	2	trout	cis-bicyclo(4.3.0)nonane	0.5263	0.0277	1.8551	0.0948	0.3936	0.1458	0.0118	0.0044	0.5217	0.0689	528.66	27.62	528.43	27.61	1.813	0.0947	0.0156	0.0017	0	0.1183	ID	0.8827	0.0981	0.7944	0	0.0095	0.0025	0.5654	0.8446		0.0226	0.006	0.0831	0.022	1013	144.2	19343.7	2754.5	967.2	137.7	0.052	0.192	0	0.000608	0.0884	0.0116
19	2	trout	2,2,4,6,6-pentamethyl-3-heptene	0.5252	0.0274	0.0598	0.0029	0.1131	0.0364	0.0034	0.0011	0.2453	0.0302	537.42	28.68	511.46	27.29	0.0134	0.0007	0.0156	0.0017	0.1855	0.0308		0.8788	0.0967	0.7944	0	0.0138	0.0016	6.0962	2.6116		0.0138	0.0032	0.0509	0.0117	2084.7	280	39936.8	5364	1996.8	268.2	0.052	0.192	0	0.00147	0.0284	0.0281
20	2	trout	1-tert-butyl-4-methylbenzene	0.5261	0.0276	0.1041	0.0046	0.5256	0.1262	0.0158	0.0038	0.5696	0.0457	537.18	28.65	531.27	28.33	0.0641	0.0034	0.0156	0.0017	0.4655	0.0476		0.8819	0.0978	0.7944	0	0.0074	0.0021	0.0014	0.4123		0.0277	0.0049	0.1019	0.018	932.7	90	17866.5	1724.1	893.3	86.2	0.052	0.192	0	0.00282	0.128	0.0541
21	2	trout	1,2,3,4-tetramethylbenzene	0.5263	0.0277	0.982	0.0496	0.3106	0.0971	0.0093	0.0029	0.6353	0.0614	532.92	28.11	532.49	28.09	0.9387	0.0495	0.0156	0.0017	0	0.0799	ID	0.8827	0.0981	0.7944	0	0.0108	0.0019	1.1651	0.9151		0.0147	0.0035	0.0539	0.0127	838.1	92.5	16029.2	1768.2	801.5	88.4	0.052	0.192	0	0.000931	0.0718	0.0178
22	2	trout	1-dodecene	0.5244	0.0272	0.0534	0.0029	0.1485	0.0566	0.0045	0.0017	0.2194	0.0351	537.45	28.68	493.65	26.34	0.0075	0.0004	0.0155	0.0017	0.1661	0.0359		0.8759	0.0956	0.7944	0	0.0132	0.0017	4.2286	2.313		0.0203	0.0053	0.0747	0.0195	2249.7	379.9	43097.2	7277.2	2154.9	363.9	0.052	0.192	0	0.00179	0.0313	0.0343
23	2	trout	1,4-dimethyl-1,2,3,4-tetrahydronaphthalene	0.5262	0.0277	0.1943	0.0086	0.4772	0.0659	0.0143	0.002	0.3288	0.0135	536.74	28.59	534.2	28.45	0.1535	0.0082	0.0157	0.0017	0.1345	0.0167		0.8824	0.098	0.7944	0	0.0082	0.0014	0.1723	0.2768		0.0435	0.0047	0.1603	0.0172	1624.6	109.4	31113.4	2095.6	1555.7	104.8	0.052	0.192	0	0.00461	0.121	0.0884
24	2	trout	1-hexadecene	0.3932	0.0285	0.0386	0.0024	0.3532	0.0427	0.0106	0.0013	0.063	0.0076	537.49	28.69	66.63	3.56	0.0001	0	0.0091	0.0011	0.0244	0.0083		0.5149	0.0614	0.7944	0	0.0059	0.0008	0.1484	0.2092		0.1681	0.011	0.6191	0.0404	1057.2	139.5	20253.8	2672.6	1012.7	133.6	0.052	0.192	0	0.0162	0.144	0.31
25	3	trout	hexachlorobenzene	0.5255	0.0275	0.0945	0.0044	0.5751	0.0612	0.0173	0.0018	0.1094	0.0125	691.89	31.35	666.03	30.18	0.0426	0.0019	0.0293	0.0032	0.015	0.0147		0.8798	0.097	0.7944	0	0.0139	0.0023	0	0.1779	ID	0.1577	0.0082	1.0669	0.0557	6085.6	751.6	214268	26463.4	10713.4	1323.2	0.028	0.192	0	0.00113	0.0112	0.0398
26	3	trout	naphthalene	0.5263	0.0277	10.9033	0.4624	0.0419	0.011	0.0013	0.0003	1.7639	0.2453	663.51	28.31	663.39	28.31	10.8361	0.4624	0.029	0.0032	0	0.5236	ID	0.8827	0.0981	0.7944	0	0.0277	0.0031	19.3849	5.9888		0.0007	0.0001	0.0048	0.0007	376.1	54.9	13038.9	1902.5	651.9	95.1	0.029	0.192	0	1.31e-05	0.0112	0.000456
27	3	trout	2-methylnaphthalene	0.5263	0.0277	3.1744	0.1379	0.1084	0.0352	0.0033	0.0011	2.1444	0.3303	683.91	30.33	683.5	30.31	3.1089	0.1379	0.0292	0.0032	0	0.3588	ID	0.8827	0.0981	0.7944	0	0.0261	0.0031	6.4632	2.7626		0.0015	0.0003	0.0102	0.002	318.7	51.3	11175.3	1796.9	558.8	89.8	0.029	0.192	0	9.99e-05	0.0248	0.0035
28	3	trout	2,3-dimethylnaphthalene	0.5263	0.0277	0.9716	0.0411	0.1344	0.0528	0.004	0.0016	1.8373	0.3731	689.65	31.05	688.28	30.99	0.9067	0.0408	0.0293	0.0033	0.8658	0.3767		0.8826	0.098	0.7944	0	0.0254	0.0032	4.8906	2.6548		0.0022	0.0005	0.0148	0.0033	374.6	78.2	13174.1	2748.6	658.7	137.4	0.028	0.192	0	0.000212	0.0306	0.00747
29	3	trout	deuterated n-hexadecane	0.3587	0.0329	0.0516	0.0037	0.1888	0.0211	0.0057	0.0006	0.1117	0.0132	692	31.37	64.91	2.94	0.0001	0	0.0148	0.0021	0.0602	0.014		0.4444	0.0636	0.7944	0	0.012	0.0017	1.1149	0.3789		0.0507	0.0027	0.3431	0.0184	580.9	73.7	20454.5	2593.9	1022.7	129.7	0.028	0.192	0	0.00583	0.104	0.205
30	3	trout	anthracene	0.5263	0.0277	0.8766	0.0367	0.0245	0.0152	0.0007	0.0005	1.2557	0.4818	689.9	31.08	688.37	31.02	0.8085	0.0364	0.0293	0.0033	0.3792	0.4836		0.8826	0.098	0.7944	0	0.0286	0.0032	34.3742	22.6631		0.0006	0.0002	0.004	0.0011	548.2	212.5	19280.7	7473.2	964	373.7	0.028	0.192	0	6.37e-05	0.00626	0.00224
31	3	trout	benzo[a]pyrene	0.5242	0.0272	0.0852	0.0046	0.011	0.007	0.0003	0.0002	0.6462	0.2571	691.95	31.36	632	28.64	0.017	0.0008	0.0291	0.0032	0.561	0.2574		0.8754	0.0954	0.7944	0	0.0288	0.0031	78.1814	51.7186		0.0005	0.0001	0.0034	0.001	978.1	393	34439.2	13838.3	1722	691.9	0.028	0.192	0	4.81e-05	0.00245	0.00169
32	3	trout	dibenz[a,h]anthracene	0.5177	0.0257	0.0712	0.0043	0.0248	0.0153	0.0007	0.0005	0.8041	0.2802	691.99	31.36	501.84	22.75	0.0041	0.0002	0.0284	0.0029	0.7329	0.2806		0.8529	0.0877	0.7944	0	0.0277	0.0029	32.8079	21.6054		0.0009	0.0003	0.0062	0.002	624.1	220	21975.1	7746.3	1098.8	387.3	0.028	0.192	0	8.19e-05	0.00533	0.00288
33	4	trout	isodecanol (low concentration)	0.5263	0.0277	5.0819	0.2097	0.0492	0.019	0.0015	0.0006	1.32	0.3112	693.18	29.02	692.97	29.01	5.0075	0.2097	0.0238	0.0026	0	0.3756	ID	0.8827	0.0981	0.7944	0	0.0227	0.0026	16.259	7.1715		0.0011	0.0002	0.0062	0.0011	525	126.1	15112.9	3629.6	755.6	181.5	0.035	0.192	0	0.000144	0.0571	0.00414
34	4	trout	isodecanol (high concentration)	0.5263	0.0277	5.0751	0.2097	0.3368	0.1098	0.0101	0.0033	3.3604	0.3958	693.18	29.02	692.97	29.01	5.0075	0.2097	0.0238	0.0026	0	0.4499	ID	0.8827	0.0981	0.7944	0	0.0158	0.0032	0.9434	0.876		0.003	0.0007	0.0166	0.0039	206.2	25.9	5936.4	744.2	296.8	37.2	0.035	0.192	0	0.00463	1.84	0.133
35	4	trout	isotridecanol (low concentration)	0.5261	0.0277	0.2215	0.0085	0.1156	0.0345	0.0035	0.001	1.8155	0.2846	708.7	30.91	701.87	30.61	0.1486	0.0065	0.024	0.0027	1.594	0.2855		0.882	0.0978	0.7944	0	0.0212	0.0025	5.9504	2.3961		0.0019	0.0003	0.0106	0.0018	386.6	63.1	11203.6	1828.6	560.2	91.4	0.035	0.192	0	0.000984	0.14	0.0285
36	4	trout	isotridecanol (high concentration)	0.5261	0.0277	0.2213	0.0085	0.1263	0.0465	0.0038	0.0014	1.2534	0.1674	708.7	30.91	701.87	30.61	0.1486	0.0065	0.024	0.0027	1.0322	0.1685		0.882	0.0978	0.7944	0	0.0209	0.0026	5.3073	2.6588		0.003	0.0008	0.0168	0.0045	560	78.9	16227.5	2285.9	811.4	114.3	0.035	0.192	0	0.00753	0.739	0.218
37	5	trout	methylnaphthalenes	0.5263	0.0277	3.3559	0.1894	0.4329	0.1108	0.013	0.0033	1.1748	0.0887	853.03	49.26	852.52	49.23	3.278	0.1893	0.0247	0.0027	0	0.2101	ID	0.8827	0.0981	0.7944	0	0.014	0.0032	0.3618	0.5373		0.0111	0.0022	0.0634	0.0125	725.6	69.1	21647	2061.9	1082.4	103.1	0.034	0.192	0	0.00194	0.511	0.058
38	5	trout	di-methyl & ethyl naphthalenes	0.5263	0.0277	0.9896	0.0535	0.4772	0.0889	0.0143	0.0027	0.7771	0.0381	860.31	50.14	858.53	50.03	0.9128	0.0532	0.0248	0.0028	0	0.0667	ID	0.8826	0.098	0.7944	0	0.013	0.0026	0.1726	0.3611		0.0184	0.0027	0.1059	0.0157	1104.8	84.2	33044.4	2519.9	1652.2	126	0.033	0.192	0	0.00418	0.327	0.125
39	5	trout	tri-methyl naphthalenes	0.5262	0.0277	0.5287	0.0267	0.321	0.0571	0.0096	0.0017	0.628	0.0345	861.74	50.32	858.17	50.11	0.448	0.0262	0.0248	0.0028	0.0993	0.0446		0.8824	0.098	0.7944	0	0.0168	0.0023	1.0719	0.5311		0.0153	0.0021	0.0882	0.0118	1366.5	109.8	40893.8	3285.8	2044.7	164.3	0.033	0.192	0	0.00158	0.0785	0.0473
40	6	trout	1-decene	0.5255	0.0275	0.0564	0.0032	0.4999	0.17	0.01	0.0034	0.3802	0.0572	565.35	23.97	545.54	23.13	0.0215	0.0009	0.0113	0.0012	0.3238	0.059		0.88	0.0971	0.7944	0	0.0056	0.002	0.0859	0.6064		0.0263	0.0057	0.1046	0.0227	1435.1	225	29710.4	4657.6	1485.5	232.9	0.048	0.192	0	0.000873	0.0396	0.0181
41	6	trout	5-ethyl-1-nonene	0.5258	0.0276	0.0645	0.0028	0.6969	0.0789	0.0139	0.0016	0.1036	0.0081	565.31	23.96	551.61	23.38	0.0319	0.0014	0.0113	0.0012	0.0391	0.0093		0.8809	0.0974	0.7944	0	0.0053	0.001	0	0.1492	ID	0.1346	0.0087	0.5356	0.0345	5326.8	476.4	110281	9863.7	5514	493.2	0.048	0.192	0	0.00948	0.124	0.196
42	6	trout	3-ethylnonane	0.5256	0.0275	0.0624	0.0027	0.1032	0.0274	0.0021	0.0005	0.2358	0.027	565.35	23.97	546.78	23.18	0.0231	0.001	0.0113	0.0012	0.1734	0.0274		0.8802	0.0971	0.7944	0	0.0101	0.0012	6.857	2.4198		0.0087	0.0016	0.0348	0.0062	2318.7	283.5	48004.3	5868.7	2400.2	293.4	0.048	0.192	0	0.000838	0.0233	0.0174
43	6	trout	1,4-diisopropylcyclohexane	0.5253	0.0274	0.0494	0.0027	0.6268	0.1012	0.0125	0.002	0.1637	0.012	565.38	23.97	539.2	22.86	0.016	0.0007	0.0113	0.0012	0.1143	0.0132		0.879	0.0967	0.7944	0	0.0053	0.0012	0	0.2337	ID	0.0766	0.0083	0.3047	0.033	3293.6	280.1	68189.2	5799.9	3409.5	290	0.048	0.192	0	0.00591	0.119	0.122
44	6	trout	1-dodecene	0.5244	0.0272	0.0458	0.0025	0.2886	0.0568	0.0058	0.0011	0.1651	0.0191	565.41	23.98	519.33	22.03	0.0086	0.0004	0.0112	0.0012	0.1193	0.0198		0.8759	0.0956	0.7944	0	0.008	0.0011	1.3643	0.6421		0.035	0.004	0.1392	0.0158	3146.3	388.8	65140.3	8049.5	3257	402.5	0.048	0.192	0	0.00135	0.0268	0.0279
45	6	trout	1-isobutyl-2,5-dimethylcyclohexane	0.5253	0.0274	0.0496	0.0028	0.6046	0.1153	0.0121	0.0023	0.2129	0.0146	565.38	23.97	539.2	22.86	0.016	0.0007	0.0113	0.0012	0.1633	0.0158		0.879	0.0967	0.7944	0	0.0053	0.0014	0	0.2845	ID	0.0568	0.0079	0.226	0.0316	2532.1	204.2	52422.8	4227.1	2621.1	211.4	0.048	0.192	0	0.00402	0.104	0.0833
46	6	trout	2,2,3-trimethyldecane	0.521	0.0264	0.0415	0.0025	0.1651	0.0327	0.0033	0.0007	0.1542	0.0147	565.44	23.98	457.09	19.39	0.0031	0.0001	0.0111	0.0012	0.1127	0.0152		0.8641	0.0915	0.7944	0	0.0092	0.001	3.5767	1.1351		0.0214	0.0028	0.0852	0.011	2964.1	310.5	61367.9	6428.9	3068.4	321.4	0.048	0.192	0	0.00201	0.0375	0.0415
47	6	trout	n-hexylcyclohexane	0.5246	0.0273	0.0486	0.0026	0.125	0.0341	0.0025	0.0007	0.2426	0.0278	565.41	23.98	523.84	22.22	0.0096	0.0004	0.0112	0.0012	0.194	0.0282		0.8766	0.0958	0.7944	0	0.0098	0.0011	5.3417	2.0285		0.0103	0.0019	0.041	0.0076	2159.2	264.5	44703.7	5476	2235.2	273.8	0.048	0.192	0	0.000917	0.0264	0.019
48	6	trout	2,2,4,4,6,8,8-heptamethylnonane	0.4454	0.0219	0.0339	0.0024	0.4473	0.051	0.0089	0.001	0.0607	0.008	565.45	23.98	116.19	4.93	0.0002	0	0.0082	0.0007	0.0268	0.0087		0.638	0.0566	0.7944	0	0.0045	0.0006	0	0.1769	ID	0.1473	0.0105	0.5862	0.0418	1913.2	265.8	39611	5503.6	1980.6	275.2	0.048	0.192	0	0.0142	0.148	0.293
49	6	trout	2,6,10-trimethyldodecane	0.4824	0.0208	0.0333	0.0024	0.6044	0.0701	0.0121	0.0014	0.0631	0.0082	565.45	23.98	189.84	8.05	0.0003	0	0.0095	0.0008	0.0298	0.009		0.7404	0.0618	0.7944	0	0.0049	0.0007	0	0.1477	ID	0.1915	0.0135	0.7622	0.0536	3008.3	410.9	62284.6	8507.5	3114.2	425.4	0.048	0.192	0	0.0138	0.133	0.286
50	6	trout	1,1,6,-trimethyltetralin	0.5259	0.0276	0.0752	0.0033	0.9141	0.1181	0.0183	0.0024	0.2279	0.0099	565.25	23.96	555.38	23.54	0.045	0.0019	0.0113	0.0012	0.1527	0.0114		0.8814	0.0976	0.7944	0	0.0054	0.0013	0	0.1249	ID	0.0802	0.0078	0.3192	0.031	2436.9	147.8	50449.5	3059.8	2522.5	153	0.048	0.192	0	0.00431	0.121	0.0892
51	6	trout	1-hexadecene	0.3932	0.0285	0.0315	0.0024	0.672	0.0784	0.0134	0.0016	0.0543	0.0082	565.45	23.98	70.09	2.97	0.0001	0	0.0066	0.0008	0.0228	0.0089		0.5149	0.0614	0.7944	0	0.004	0.0006	0	0.0943	ID	0.2477	0.0203	0.9855	0.0807	1291.8	203.1	26744.5	4204.2	1337.2	210.2	0.048	0.192	0	0.00547	0.0645	0.113
52	7	trout	isoundecanol ethoxylate	0.5263	0.0277	10.8806	0.518	0.107	0.0422	0.0032	0.0013	1.9693	0.35	640.22	30.68	640.11	30.68	10.8081	0.518	0.0306	0.0034	0	0.6258	ID	0.8827	0.0981	0.7944	0	0.0274	0.0033	6.5731	3.3546		0.0016	0.0004	0.0115	0.0028	325	60	11891.2	2195.5	594.6	109.8	0.027	0.192	0	0.000155	0.132	0.00569
53	8	trout	5-ethyl-1-nonene	0.5258	0.0276	0.0929	0.006	0.2928	0.0764	0.0088	0.0023	0.2882	0.037	641.38	29.17	625.84	28.46	0.0465	0.0021	0.0218	0.0024	0.1954	0.0389		0.8809	0.0974	0.7944	0	0.0154	0.0024	1.3329	0.819		0.0305	0.0047	0.155	0.024	2171.3	296.5	57438	7842.4	2871.9	392.1	0.038	0.192	0	0.000869	0.02	0.023
54	9	trout	2,6,10-trimethyldodecane	0.4824	0.0208	0.0427	0.0045	0.1827	0.0343	0.0055	0.001	0.0711	0.0118	654.06	30.7	219.6	10.31	0.0006	0	0.0194	0.0016	0.0284	0.0131		0.7404	0.0618	0.7944	0	0.0158	0.0015	2.5164	0.8097		0.0771	0.0079	0.4139	0.0423	3088.3	532.8	86264.2	14883	4313.2	744.2	0.036	0.192	0	0.00239	0.0166	0.0668
55	10	trout	5-ethyl-1-nonene	0.5258	0.0276	0.1048	0.0037	0.3817	0.0886	0.0115	0.0027	0.2961	0.0247	725.29	31.98	707.71	31.21	0.053	0.0023	0.022	0.0024	0.1912	0.0266		0.8809	0.0974	0.7944	0	0.0136	0.0025	0.6324	0.5583		0.0387	0.0065	0.1982	0.0334	2390.4	226.4	63739.7	6037.7	3187	301.9	0.038	0.192	0	0.002	0.0477	0.0533
56	10	trout	2,3-dimethyldecane	0.5244	0.0272	0.0712	0.0028	0.1592	0.0428	0.0048	0.0013	0.9366	0.0991	725.43	32	667.51	29.44	0.0146	0.0006	0.0218	0.0024	0.8654	0.1		0.876	0.0956	0.7944	0	0.0184	0.0022	3.8316	1.5627		0.0051	0.0009	0.0261	0.0048	712.7	81.9	19005.1	2184.5	950.3	109.2	0.038	0.192	0	0.000282	0.0208	0.00751
57	10	trout	2-methyl-1-tridecene	0.5057	0.0234	0.0559	0.0024	0.1913	0.0396	0.0057	0.0012	0.2676	0.0217	725.47	32.01	380.75	16.8	0.0013	0.0001	0.0203	0.0019	0.2117	0.0225		0.8129	0.076	0.7944	0	0.0164	0.0017	2.6409	0.9371		0.0215	0.0031	0.1099	0.016	1422.9	131.9	37943.1	3517	1897.2	175.9	0.038	0.192	0	0.00129	0.0296	0.0343
58	10	trout	bicyclohexyl	0.5252	0.0274	0.071	0.0039	0.6347	0.152	0.019	0.0046	0.5678	0.0481	725.39	31.99	689.6	30.42	0.0248	0.0011	0.0219	0.0024	0.4968	0.051		0.8788	0.0966	0.7944	0	0.0104	0.0034	0	0.3362	ID	0.0335	0.0058	0.1719	0.0297	1214.5	116.2	32386.6	3099	1619.3	155	0.038	0.192	0	0.00137	0.0624	0.0365
59	10	trout	decylbenzene	0.4937	0.0217	0.0513	0.0028	0.3632	0.1046	0.0109	0.0031	0.3269	0.0475	725.47	32.01	296.45	13.08	0.0008	0	0.0193	0.0017	0.2756	0.0494		0.7748	0.0674	0.7944	0	0.0123	0.0023	0.5642	0.6256		0.0333	0.0057	0.1708	0.0292	906.9	138.3	24184.9	3687.2	1209.2	184.4	0.038	0.192	0	0.00167	0.0496	0.0445
60	10	trout	3-phenylbicyclohexyl	0.4814	0.0208	0.0519	0.0022	0.2848	0.058	0.0085	0.0017	0.4847	0.0391	725.48	32.01	239.97	10.59	0.0006	0	0.0184	0.0015	0.4328	0.0401		0.7376	0.0615	0.7944	0	0.0131	0.0015	1.0581	0.55		0.0176	0.0025	0.0903	0.0126	495.1	45.6	13203	1217	660.1	60.9	0.038	0.192	0	0.00091	0.0417	0.0243
61	10	trout	1,2-dicyclohexylethane	0.5156	0.0252	0.0557	0.0027	0.2916	0.0758	0.0087	0.0023	0.9426	0.096	725.47	32.01	492.27	21.72	0.0025	0.0001	0.0211	0.0021	0.8869	0.0975		0.8455	0.0854	0.7944	0	0.0149	0.0022	1.2595	0.7818		0.0093	0.0016	0.0476	0.0084	522.2	58.1	13926.4	1550.5	696.3	77.5	0.038	0.192	0	0.000319	0.0247	0.00851
62	10	trout	4-pentyl-1-phenylbenzene	0.5234	0.027	0.0581	0.0039	0.5317	0.1518	0.016	0.0046	1.1682	0.113	725.44	32	642.16	28.33	0.0097	0.0004	0.0217	0.0024	1.1101	0.1159		0.8726	0.0944	0.7944	0	0.0104	0.0035	0	0.4759	ID	0.0137	0.0028	0.07	0.0145	549.7	58.6	14659.1	1563.1	733	78.2	0.038	0.192	0	0.000626	0.0584	0.0167
63	10	trout	2,3-dimethyl-5-(4-methylpentyl)naphthalene	0.5033	0.023	0.0535	0.0027	0.2947	0.0866	0.0088	0.0026	1.0437	0.1124	725.47	32.01	360.51	15.9	0.0012	0.0001	0.0201	0.0018	0.9902	0.114		0.8051	0.0741	0.7944	0	0.0142	0.0022	1.1328	0.8225		0.0085	0.0017	0.0434	0.009	345.4	40.3	9210.9	1075.1	460.5	53.8	0.038	0.192	0	0.00039	0.0351	0.0104
64	11	trout	2,6-dimethyldecane	0.5244	0.0272	0.0674	0.004	0.3114	0.1162	0.0093	0.0035	1.9953	0.3321	698.87	30.08	643.07	27.67	0.0141	0.0006	0.0218	0.0024	1.9279	0.3344		0.876	0.0956	0.7944	0	0.015	0.003	1.1428	1.0706		0.0047	0.0011	0.024	0.0057	322.3	55.6	8594.3	1481.7	429.7	74.1	0.038	0.192	0	0.000233	0.0367	0.00622
65	11	trout	n-dodecane	0.5244	0.0272	0.0691	0.0037	0.221	0.0795	0.0066	0.0024	0.8043	0.1253	698.87	30.08	641.92	27.63	0.0138	0.0006	0.0218	0.0024	0.7352	0.1269		0.8759	0.0956	0.7944	0	0.017	0.0025	2.2926	1.4646		0.0082	0.0019	0.0423	0.0097	798.1	129.4	21283.2	3450	1064.2	172.5	0.038	0.192	0	0.000431	0.0275	0.0115
66	11	trout	n-heptylcyclohexane	0.521	0.0264	0.0626	0.0034	0.1058	0.034	0.0032	0.001	0.8072	0.112	698.9	30.08	564.97	24.32	0.005	0.0002	0.0215	0.0023	0.7446	0.1127		0.8641	0.0915	0.7944	0	0.0193	0.0022	6.5094	2.7335		0.0039	0.0008	0.0202	0.0041	699.9	102	18663.5	2719.5	933.2	136	0.038	0.192	0	0.000181	0.0117	0.00483
67	11	trout	1,2,3,4,5,6,7,8-octahydrophenanthrene	0.525	0.0274	0.077	0.0034	0.1858	0.0327	0.0056	0.001	0.2442	0.0182	698.84	30.07	659.69	28.39	0.0208	0.0009	0.0219	0.0024	0.1672	0.0191		0.8782	0.0964	0.7944	0	0.0178	0.0021	3.0548	0.9333		0.0228	0.0027	0.117	0.014	2701.7	233.3	72042.2	6222.3	3602.1	311.1	0.038	0.192	0	0.00104	0.0202	0.0276
68	11	trout	3,3',5,5'-tetramethylbibenzyl	0.5134	0.0248	0.056	0.0031	0.254	0.0402	0.0076	0.0012	0.1241	0.0111	698.91	30.08	446.19	19.2	0.002	0.0001	0.0209	0.0021	0.0681	0.0122		0.8383	0.0832	0.7944	0	0.0156	0.0018	1.6674	0.5769		0.0614	0.0062	0.3147	0.0316	3595.4	358.2	95876.3	9553.1	4793.8	477.7	0.038	0.192	0	0.00219	0.0233	0.0583
69	11	trout	2,3-dimethyl-2,3-diphenylbutane	0.5217	0.0266	0.0618	0.0033	0.1812	0.0384	0.0054	0.0012	0.1924	0.0211	698.9	30.08	578.88	24.91	0.0057	0.0002	0.0216	0.0023	0.1307	0.022		0.8664	0.0923	0.7944	0	0.0177	0.0021	3.1214	1.0958		0.0282	0.0038	0.1448	0.0193	3008.4	355	80222.5	9465.8	4011.1	473.3	0.038	0.192	0	0.00108	0.0168	0.0287
70	11	trout	3,3',4,4'-tetramethyl-1,1'-biphenyl	0.5249	0.0274	0.0779	0.0035	0.0802	0.0178	0.0024	0.0005	1.2588	0.1594	698.85	30.07	657.14	28.28	0.0194	0.0008	0.0219	0.0024	1.1809	0.1598		0.8778	0.0963	0.7944	0	0.0201	0.0022	9.2736	2.6665		0.0019	0.0002	0.0098	0.0011	522	70	13920.9	1866.7	696	93.3	0.038	0.192	0	7.15e-05	0.00708	0.00191
71	11	trout	5α(H)-androstane	0.5195	0.0261	0.0606	0.0032	0.1413	0.0209	0.0042	0.0006	0.0681	0.0102	698.9	30.08	536.35	23.08	0.0039	0.0002	0.0214	0.0022	0.0075	0.0111		0.8588	0.0897	0.7944	0	0.0184	0.002	4.4228	1.0497		0.0622	0.0053	0.319	0.0272	7872.7	1230.1	209939	32803.4	10496.9	1640.2	0.038	0.192	0	0.00228	0.0131	0.0609
72	11	trout	1,2,3,6,7,8-hexahydropyrene	0.5243	0.0272	0.0696	0.0035	0.1702	0.0482	0.0051	0.0014	0.4712	0.0517	698.87	30.08	639.54	27.52	0.0131	0.0006	0.0218	0.0024	0.4016	0.0527		0.8755	0.0955	0.7944	0	0.0181	0.0022	3.4745	1.5306		0.0108	0.0021	0.0555	0.0109	1357.4	160.3	36196.4	4274.2	1809.8	213.7	0.038	0.192	0	0.000422	0.0158	0.0112
73	12	trout	2,3-dimethylheptane	0.5263	0.0277	0.4174	0.0158	0.1725	0.0457	0.0052	0.0014	0.3702	0.0439	671.97	28.85	669.84	28.76	0.3635	0.0156	0.0196	0.0022	0	0.0474	ID	0.8825	0.098	0.7944	0	0.0162	0.002	3.4382	1.4328		0.014	0.0024	0.0639	0.0108	1809.2	228.7	43054.4	5443.4	2152.7	272.2	0.042	0.192	0	0.00116	0.0383	0.0277
74	12	trout	2,6-dimethyloctane	0.5261	0.0277	0.1716	0.0057	0.0416	0.0092	0.0012	0.0003	0.4085	0.0379	672.93	28.98	666.46	28.7	0.1152	0.005	0.0196	0.0022	0.2369	0.0385		0.882	0.0978	0.7944	0	0.0187	0.0021	19.5296	5.1968		0.0031	0.0004	0.014	0.002	1631.6	167.5	38841.6	3986.9	1942.1	199.3	0.042	0.192	0	0.000284	0.0091	0.00677
75	12	trout	3-methyldecane	0.5256	0.0275	0.0879	0.003	0.0546	0.0122	0.0016	0.0004	0.3852	0.0377	673.26	29.03	651.15	28.07	0.0317	0.0014	0.0195	0.0022	0.2973	0.038		0.8802	0.0971	0.7944	0	0.0185	0.0021	14.4462	3.9737		0.0043	0.0006	0.0195	0.0028	1690.4	181.1	40245.6	4312.7	2012.3	215.6	0.042	0.192	0	0.000429	0.013	0.0102
76	12	trout	2,3-dimethyldecane	0.5244	0.0272	0.0689	0.0028	0.0158	0.0035	0.0005	0.0001	0.129	0.0151	673.34	29.04	619.58	26.72	0.0121	0.0005	0.0194	0.0021	0.0601	0.0154		0.876	0.0956	0.7944	0	0.0191	0.0021	53.8057	13.7051		0.0037	0.0005	0.0168	0.0023	4803.2	600.5	114359	14298.1	5718	714.9	0.042	0.192	0	0.000362	0.00369	0.00863
77	12	trout	2-methylundecane	0.5241	0.0271	0.066	0.0027	0.073	0.0138	0.0022	0.0004	0.2163	0.0184	673.34	29.04	611.33	26.36	0.0103	0.0004	0.0194	0.0021	0.1503	0.0188		0.8748	0.0952	0.7944	0	0.018	0.002	10.3183	2.5695		0.0101	0.0013	0.0463	0.0057	2826.4	269.9	67295.3	6426.7	3364.8	321.3	0.042	0.192	0	0.000928	0.0159	0.0221
78	12	trout	2,6-dimethylundecane	0.5205	0.0263	0.059	0.0026	0.0888	0.0196	0.0027	0.0006	0.1554	0.0203	673.37	29.04	534.76	23.06	0.0039	0.0002	0.0191	0.002	0.0964	0.0207		0.8623	0.0909	0.7944	0	0.0174	0.0019	8.0584	2.337		0.0171	0.0021	0.0784	0.0097	3440.4	473.6	81914.9	11276.4	4095.7	563.8	0.042	0.192	0	0.00185	0.0233	0.0441
79	12	trout	2,2,3-trimethyldecane	0.521	0.0264	0.0605	0.0026	0.0351	0.0075	0.0011	0.0002	0.1541	0.0195	673.37	29.04	544.33	23.48	0.0043	0.0002	0.0192	0.002	0.0936	0.0198		0.8641	0.0915	0.7944	0	0.0185	0.002	22.9502	5.8016		0.0068	0.0008	0.0313	0.0037	3532.3	474.4	84101.2	11296.1	4205.1	564.8	0.042	0.192	0	0.000593	0.00733	0.0141
80	12	trout	4-methyldodecane	0.5195	0.0261	0.0585	0.0025	0.0806	0.0138	0.0024	0.0004	0.1688	0.0119	673.37	29.04	516.76	22.29	0.0033	0.0001	0.019	0.002	0.1103	0.0124		0.8588	0.0897	0.7944	0	0.0175	0.0018	8.9963	2.087		0.0143	0.0017	0.0656	0.0077	3061.1	253.7	72882.1	6039.8	3644.1	302	0.042	0.192	0	0.00173	0.0237	0.0413
81	12	trout	n-tetradecane	0.5028	0.0229	0.0497	0.0023	0.3765	0.0591	0.0113	0.0018	0.0816	0.0103	673.38	29.04	330.86	14.27	0.0009	0	0.0178	0.0016	0.0318	0.0114		0.8035	0.0737	0.7944	0	0.0111	0.0015	0.5363	0.3567		0.1385	0.011	0.6337	0.0505	4056.8	541.9	96591.3	12901.5	4829.6	645.1	0.042	0.192	0	0.0143	0.108	0.34
82	12	trout	2-isopropyldecalin	0.5258	0.0276	0.1015	0.0034	0.0261	0.0102	0.0008	0.0003	0.1978	0.0537	673.21	29.02	657.24	28.33	0.0448	0.0019	0.0195	0.0022	0.0963	0.054		0.8809	0.0974	0.7944	0	0.019	0.0021	32.1332	13.6777		0.004	0.0007	0.0181	0.0031	3322	916	79090.1	21809.1	3954.5	1090.5	0.042	0.192	0	0.000373	0.00579	0.00888
83	12	trout	3-methyl-1-hexylcyclohexane	0.5218	0.0266	0.0606	0.0026	0.0685	0.025	0.0021	0.0007	0.1677	0.034	673.36	29.04	559.86	24.15	0.005	0.0002	0.0192	0.002	0.107	0.0345		0.8668	0.0924	0.7944	0	0.0179	0.002	10.9876	4.7795		0.0123	0.0026	0.0561	0.0119	3339	693.9	79499.8	16520.9	3975	826	0.042	0.192	0	0.00106	0.0142	0.0251
84	12	trout	n-octylcyclohexane	0.5102	0.0242	0.0566	0.0024	0.0455	0.0128	0.0014	0.0004	0.133	0.0192	673.38	29.04	394.21	17	0.0014	0.0001	0.0184	0.0018	0.0764	0.0196		0.8275	0.08	0.7944	0	0.0175	0.0017	16.5851	5.4145		0.0103	0.0018	0.0469	0.0083	2964.1	448.9	70574	10687.1	3528.7	534.4	0.042	0.192	0	0.000898	0.01	0.0214
85	12	trout	2-hexyltetralin	0.5125	0.0246	0.0573	0.0025	0.03	0.0129	0.0009	0.0004	0.3217	0.0688	673.38	29.04	419.38	18.09	0.0016	0.0001	0.0185	0.0018	0.2644	0.0691		0.8353	0.0823	0.7944	0	0.018	0.0018	26.2476	12.3365		0.0028	0.0007	0.0128	0.0033	1303.5	285.3	31034.9	6791.8	1551.7	339.6	0.042	0.192	0	0.000285	0.00758	0.00679
86	13	trout	hexachlorobenzene	0.5255	0.0275	0.0808	0.0026	0.5697	0.0582	0.0171	0.0017	0.0868	0.0055	649.37	28.07	625.1	27.02	0.0306	0.0013	0.0224	0.0025	0.006	0.0069		0.8798	0.097	0.7944	0	0.0106	0.0017	0	0.174	ID	0.197	0.0141	1.0314	0.0741	7203.2	555.3	196265	15130.2	9813.2	756.5	0.037	0.192	0	0.00436	0.0341	0.119
87	13	trout	1,1,3,3,5-pentamethylindan	0.5254	0.0275	0.0859	0.0028	0.2507	0.0435	0.0075	0.0013	0.2878	0.0135	649.37	28.07	623.49	26.95	0.0286	0.0012	0.0224	0.0025	0.202	0.0146		0.8796	0.0969	0.7944	0	0.0168	0.0021	1.8348	0.674		0.0261	0.0036	0.1368	0.0189	2166.1	138.6	59019.4	3777.6	2951	188.9	0.037	0.192	0	0.00126	0.029	0.0343
88	13	trout	2,2,5,7-tetramethyltetraline	0.525	0.0274	0.0782	0.0027	0.1966	0.0412	0.0059	0.0012	0.6061	0.0405	649.4	28.07	613.02	26.5	0.0198	0.0009	0.0224	0.0025	0.5278	0.0414		0.8782	0.0964	0.7944	0	0.018	0.0022	2.7939	1.0149		0.0097	0.0015	0.051	0.008	1011.5	80.7	27560.5	2199.8	1378	110	0.037	0.192	0	0.00082	0.0393	0.0224
89	13	trout	6-n-butyl-2,3-dimethylnaphthalene	0.5234	0.027	0.0706	0.0028	0.0315	0.0133	0.0009	0.0004	0.3967	0.0464	649.44	28.08	573.39	24.79	0.0086	0.0004	0.0222	0.0024	0.3261	0.0468		0.8724	0.0943	0.7944	0	0.0215	0.0023	26.0219	12.0056		0.0024	0.0008	0.0125	0.0041	1445.3	180.8	39380.2	4926.6	1969	246.3	0.037	0.192	0	0.00019	0.00598	0.00519
90	13	trout	2,3-dimethyl-5-(4-methylpentyl)naphthalene	0.5033	0.023	0.0545	0.0028	0.3701	0.1063	0.0111	0.0032	1.2103	0.1143	649.47	28.08	322.74	13.95	0.0011	0	0.0205	0.0019	1.1558	0.1162		0.8051	0.0741	0.7944	0	0.0129	0.0025	0.5757	0.6374		0.0092	0.0019	0.048	0.0102	266.7	27.8	7266.1	756.7	363.3	37.8	0.037	0.192	0	0.000861	0.0898	0.0234
91	13	trout	fichtelite	0.521	0.0264	0.0643	0.0025	0.1311	0.0148	0.0039	0.0004	0.0808	0.0069	649.45	28.08	525	22.7	0.0047	0.0002	0.022	0.0023	0.0165	0.0075		0.8641	0.0915	0.7944	0	0.0191	0.0021	4.9315	0.9614		0.0487	0.0032	0.2548	0.017	6494.3	620.5	176955	16907	8847.7	845.4	0.037	0.192	0	0.00213	0.0142	0.0579
92	13	trout	dehydroabietine	0.5222	0.0267	0.0677	0.0027	0.0476	0.0109	0.0014	0.0003	0.1687	0.0158	649.45	28.08	547.87	23.69	0.0061	0.0003	0.0221	0.0024	0.1011	0.0162		0.8682	0.0929	0.7944	0	0.0211	0.0023	16.5858	4.5895		0.0085	0.0014	0.0443	0.0071	3246.7	335.2	88465.6	9132.2	4423.3	456.6	0.037	0.192	0	0.000733	0.00989	0.02
93	13	trout	9-n-butylphenanthrene	0.5227	0.0268	0.0688	0.0027	0.0381	0.014	0.0011	0.0004	0.4273	0.0404	649.45	28.08	558.83	24.16	0.007	0.0003	0.0222	0.0024	0.3585	0.0407		0.87	0.0935	0.7944	0	0.0213	0.0023	21.1452	8.6736		0.0027	0.0008	0.014	0.0041	1307.8	136.2	35633.6	3711.9	1781.7	185.6	0.037	0.192	0	0.000245	0.00833	0.00668
94	13	trout	1-ethylpyrene	0.5249	0.0273	0.0783	0.0028	0.0969	0.0344	0.0029	0.001	0.7327	0.0717	649.41	28.07	609	26.33	0.0176	0.0008	0.0224	0.0025	0.6544	0.0724		0.8776	0.0962	0.7944	0	0.0202	0.0023	7.3836	3.3366		0.004	0.0011	0.0208	0.0058	831.2	89.2	22647	2430.1	1132.3	121.5	0.037	0.192	0	0.000183	0.0106	0.005
95	13	trout	2,3,6,7-tetramethylanthracene	0.5211	0.0264	0.0666	0.0027	0.0359	0.0101	0.0011	0.0003	0.3357	0.03	649.45	28.08	527.24	22.79	0.0049	0.0002	0.022	0.0023	0.2691	0.0303		0.8645	0.0916	0.7944	0	0.0212	0.0023	22.4467	7.2486		0.0032	0.0007	0.0168	0.0036	1570.6	156.2	42795.5	4255.2	2139.8	212.8	0.037	0.192	0	0.00015	0.00403	0.00409
96	13	trout	chrysene	0.5253	0.0275	0.0875	0.003	0.0364	0.0108	0.0011	0.0003	0.3637	0.032	649.38	28.07	620.58	26.82	0.0255	0.0011	0.0224	0.0025	0.2762	0.0324		0.8792	0.0968	0.7944	0	0.0216	0.0024	22.5119	7.6415		0.003	0.0007	0.0157	0.0036	1706.2	167.9	46488.2	4574.2	2324.4	228.7	0.037	0.192	0	0.00025	0.00715	0.00681
97	13	trout	1-octylpyrene	0.1525	0.0338	0.044	0.0017	0.0355	0.0043	0.0011	0.0001	0.1044	0.0081	649.47	28.08	13.19	0.57	0	0	0.0036	0.001	0.0604	0.0082		0.1429	0.0374	0.7944	0	0.0035	0.0009	3.094	1.1308		0.0102	0.0007	0.0534	0.0037	126.3	11.2	3442.2	305.1	172.1	15.3	0.037	0.192	0	0.000435	0.0219	0.0119
98	13	trout	benzo[b]chrysene	0.5071	0.0236	0.0616	0.0024	0.0462	0.0181	0.0014	0.0005	0.4163	0.0709	649.47	28.08	351.69	15.21	0.0013	0.0001	0.0208	0.002	0.3547	0.0713		0.8172	0.0772	0.7944	0	0.0199	0.0019	16.0653	7.1116		0.0033	0.0008	0.0174	0.0044	844.8	148.8	23019	4055.7	1151	202.8	0.037	0.192	0	9.59e-05	0.00338	0.00261
99	14	trout	hexachlorobenzene	0.5255	0.0275	0.0723	0.0028	0.5347	0.0719	0.016	0.0022	0.0594	0.0085	615.85	26.38	592.84	25.39	0.0272	0.0012	0.021	0.0023	0	0.0101	ID	0.8798	0.097	0.7944	0	0.01	0.0019	0	0.2367	ID	0.27	0.022	1.3271	0.1081	9978.4	1493.3	255191	38189.9	12759.5	1909.5	0.039	0.192	0	0.00622	0.0407	0.159
100	14	trout	3,5,5'-trimethyl hexene	0.5263	0.0277	0.5806	0.0227	0.2164	0.0495	0.0065	0.0015	0.5049	0.0421	614.04	26.13	612.71	26.07	0.5287	0.0225	0.0211	0.0023	0	0.0486	ID	0.8826	0.098	0.7944	0	0.0165	0.0021	2.4023	0.9994		0.0129	0.0021	0.0631	0.0102	1213.5	114	31009.3	2912.2	1550.5	145.6	0.039	0.192	0	0.000994	0.0454	0.0254
101	14	trout	2-methyl-1-nonene	0.5261	0.0276	0.1281	0.0108	1.2869	0.4609	0.0386	0.0138	2.5583	0.3504	615.59	26.34	608.83	26.05	0.0988	0.0042	0.021	0.0023	2.4302	0.3589		0.8819	0.0978	0.7944	0	0.01	0.0097	0	0.2464	ID	0.0151	0.0037	0.0742	0.0184	238	34.2	6085.6	875.8	304.3	43.8	0.039	0.192	0	0.000613	0.124	0.0157
102	14	trout	2-methyldecane	0.5256	0.0275	0.0823	0.0038	0.2535	0.1171	0.0076	0.0035	0.9798	0.1734	615.84	26.38	595.61	25.51	0.0312	0.0013	0.021	0.0023	0.8975	0.1756		0.8802	0.0971	0.7944	0	0.0157	0.003	1.7969	1.629		0.0078	0.0025	0.0382	0.0121	607.9	111	15546.9	2838.8	777.3	141.9	0.039	0.192	0	0.000738	0.057	0.0189
103	14	trout	C7 iso-alkyl benzene	0.5259	0.0276	0.1067	0.0064	0.5066	0.2602	0.0152	0.0078	1.2822	0.2091	615.73	26.36	604.98	25.9	0.0609	0.0026	0.021	0.0023	1.1756	0.2139		0.8814	0.0976	0.7944	0	0.0104	0.0056	0.064	0.8987		0.0119	0.0045	0.0583	0.0223	471.8	79.8	12065.8	2040.3	603.3	102	0.039	0.192	0	0.000615	0.0622	0.0157
104	14	trout	1-undecene	0.5257	0.0275	0.0861	0.0042	0.293	0.1459	0.0088	0.0044	1.0511	0.1913	615.82	26.37	598.06	25.61	0.0359	0.0015	0.021	0.0023	0.965	0.194		0.8805	0.0973	0.7944	0	0.0149	0.0035	1.3306	1.5153		0.0084	0.0029	0.0411	0.0144	569	106.7	14551.1	2728.9	727.6	136.4	0.039	0.192	0	0.00092	0.0762	0.0235
105	14	trout	2-methyl-1-undecene	0.5241	0.0272	0.0624	0.0032	0.2027	0.0888	0.0061	0.0027	0.8262	0.1523	615.91	26.39	560.33	24.01	0.0103	0.0004	0.0209	0.0023	0.7639	0.154		0.875	0.0953	0.7944	0	0.0167	0.0026	2.6467	1.9268		0.0074	0.0021	0.0362	0.0103	678.2	128.7	17344.6	3292.3	867.2	164.6	0.039	0.192	0	0.000411	0.0269	0.0105
106	14	trout	2-methyl-1-dodecene	0.5195	0.0261	0.0566	0.0028	0.1237	0.0514	0.0037	0.0015	0.3036	0.0436	615.94	26.39	472.69	20.25	0.0033	0.0001	0.0205	0.0021	0.247	0.0445		0.8588	0.0897	0.7944	0	0.018	0.0022	5.29	2.9527		0.0122	0.0037	0.0601	0.0183	1556.8	233.8	39815	5979.3	1990.8	299	0.039	0.192	0	0.000715	0.0176	0.0183
107	14	trout	1-tridecene	0.5203	0.0263	0.056	0.0034	0.1769	0.1098	0.0053	0.0033	0.2577	0.0924	615.94	26.39	486.89	20.86	0.0038	0.0002	0.0206	0.0022	0.2016	0.0945		0.8618	0.0907	0.7944	0	0.0169	0.0029	3.2165	3.0552		0.0206	0.0067	0.1012	0.033	1889.7	684.3	48329.3	17501.4	2416.5	875.1	0.039	0.192	0	0.00126	0.0263	0.0321
108	14	trout	n-tridecane	0.5181	0.0258	0.0539	0.0031	0.2237	0.0911	0.0067	0.0027	0.1504	0.0377	615.94	26.39	452.12	19.37	0.0027	0.0001	0.0204	0.0021	0.0965	0.0395		0.8542	0.0881	0.7944	0	0.0158	0.0025	2.1694	1.5841		0.0446	0.0098	0.2193	0.0484	3005.2	767.1	76858.3	19618.5	3842.9	980.9	0.039	0.192	0	0.00226	0.0283	0.0578
109	14	trout	2-butyl-1-decene	0.5057	0.0234	0.0534	0.0026	0.1229	0.0504	0.0037	0.0015	0.1958	0.0395	615.95	26.39	323.27	13.85	0.0011	0	0.0194	0.0018	0.1424	0.0405		0.8129	0.076	0.7944	0	0.017	0.0019	5.0051	2.7624		0.0188	0.0048	0.0926	0.0236	1650.9	341.8	42222.9	8740.9	2111.1	437	0.039	0.192	0	0.00124	0.0209	0.0317
110	15	trout	hexachlorobenzene	0.5255	0.0275	0.0759	0.0032	0.361	0.0511	0.0108	0.0015	0.078	0.0093	565.1	28.03	543.98	26.99	0.0263	0.0013	0.0221	0.0024	0.0021	0.0107		0.8798	0.097	0.7944	0	0.0141	0.0019	0.763	0.3852		0.1389	0.0099	0.7175	0.0513	6976.5	906	187533	24354.8	9376.7	1217.7	0.037	0.192	0	0.0031	0.0209	0.0833
111	15	trout	1,3-dimethyladamantane	0.5262	0.0277	0.26	0.0106	0.0673	0.0254	0.002	0.0008	0.1763	0.0268	564.49	27.95	561.5	27.81	0.2038	0.0101	0.0222	0.0025	0	0.0293	ID	0.8823	0.0979	0.7944	0	0.0207	0.0024	11.4431	5.139		0.0114	0.003	0.0591	0.0155	3184.3	510.7	85569.9	13724.9	4278.5	686.2	0.037	0.192	0	0.000773	0.0158	0.0208
112	15	trout	1,3,5-triisopropylbenzene	0.5228	0.0268	0.059	0.003	0.2059	0.043	0.0062	0.0013	0.107	0.0141	565.17	28.04	487.81	24.21	0.0062	0.0003	0.0219	0.0024	0.048	0.0152		0.8703	0.0936	0.7944	0	0.0174	0.0021	2.5619	0.9536		0.0577	0.0068	0.2981	0.0349	4556.9	643.6	122497	17300.9	6124.9	865	0.037	0.192	0	0.00515	0.0455	0.138
113	15	trout	2,7-di-isopropyldecalin	0.5156	0.0252	0.0577	0.003	0.0486	0.0106	0.0015	0.0003	0.1038	0.0147	565.18	28.05	383.5	19.03	0.002	0.0001	0.0212	0.0021	0.0461	0.0152		0.8455	0.0854	0.7944	0	0.0202	0.0021	15.7441	4.1401		0.0141	0.0017	0.0726	0.0087	3694.8	555.8	99323.5	14939.5	4966.2	747	0.037	0.192	0	0.0013	0.0111	0.035
114	15	trout	hexadecahydropyrene	0.525	0.0274	0.0688	0.0031	0.2239	0.0409	0.0067	0.0012	0.0655	0.012	565.13	28.04	532.11	26.4	0.0162	0.0008	0.0221	0.0024	0	0.0131	ID	0.878	0.0963	0.7944	0	0.0171	0.0021	2.2493	0.79		0.1026	0.0096	0.5301	0.0497	8129.4	1542.5	218525	41464.7	10926.3	2073.2	0.037	0.192	0	0.0115	0.0667	0.309
115	15	trout	hydrogenated 1-methyl-7-(1-methylethyl)-phenanthrene (hydrogenated retene)	0.5125	0.0246	0.0561	0.0029	0.0906	0.0147	0.0027	0.0004	0.071	0.0107	565.18	28.05	351.99	17.47	0.0015	0.0001	0.021	0.0021	0.0148	0.0113		0.8353	0.0823	0.7944	0	0.0191	0.0019	7.5901	1.709		0.0383	0.0031	0.1979	0.0161	4959.9	787.5	133332	21169.3	6666.6	1058.5	0.037	0.192	0	0.00414	0.0249	0.111
116	15	trout	1,2,3,10b-tetrahydrofluoranthene	0.5263	0.0277	0.6259	0.0285	0.2058	0.0922	0.0062	0.0028	1.3409	0.1847	563.22	27.79	562.13	27.74	0.5728	0.0283	0.0222	0.0025	0.715	0.1886		0.8826	0.098	0.7944	0	0.0176	0.0028	2.611	1.9575		0.0046	0.0016	0.0238	0.008	419.2	61.5	11258.7	1651.7	562.9	82.6	0.037	0.192	0	0.000389	0.0409	0.0104
117	15	trout	4,5,9,10-tetrahydropyrene	0.5261	0.0277	0.1839	0.0073	0.11	0.0726	0.0033	0.0022	0.8849	0.2391	564.75	27.99	560.09	27.76	0.1287	0.0064	0.0222	0.0025	0.701	0.2406		0.8821	0.0979	0.7944	0	0.0197	0.0027	6.3416	5.3522		0.0037	0.0016	0.0193	0.0084	633	174.4	17011.3	4686.2	850.6	234.3	0.037	0.192	0	0.000137	0.0095	0.00368
118	15	trout	1-methyl-7-(1-methylethyl)-phenanthrene (retene)	0.5229	0.0269	0.056	0.0046	0.3509	0.1723	0.0105	0.0052	1.8098	0.217	565.16	28.04	489.29	24.28	0.0063	0.0003	0.0219	0.0024	1.7538	0.2202		0.8706	0.0937	0.7944	0	0.0142	0.0041	0.816	1.2305		0.0058	0.0023	0.0301	0.0119	270.4	35.2	7267.6	945.4	363.4	47.3	0.037	0.192	0	0.000343	0.0493	0.00921
119	15	trout	3-methylcholanthrene	0.5223	0.0267	0.0548	0.0046	0.3611	0.1745	0.0108	0.0052	1.7649	0.2124	565.17	28.04	478.42	23.74	0.0054	0.0003	0.0218	0.0023	1.71	0.2157		0.8685	0.093	0.7944	0	0.0139	0.0041	0.7424	1.1738		0.0061	0.0024	0.0317	0.0123	271.1	35.4	7287.1	951.2	364.4	47.6	0.037	0.192	0	0.000325	0.0458	0.00874
120	15	trout	indeno[1,2,3-cd]pyrene	0.5187	0.0259	0.0586	0.0031	0.0558	0.0265	0.0017	0.0008	0.5745	0.091	565.18	28.04	422.13	20.95	0.0028	0.0001	0.0215	0.0022	0.5159	0.0915		0.856	0.0888	0.7944	0	0.0203	0.0022	13.685	7.4449		0.0029	0.001	0.0151	0.0053	734.8	122.2	19752.3	3285.9	987.6	164.3	0.037	0.192	0	0.000105	0.00485	0.00281
121	15	trout	benzo[ghi]perylene	0.5198	0.0261	0.0591	0.0031	0.0604	0.028	0.0018	0.0008	0.5643	0.0883	565.17	28.04	438.18	21.74	0.0033	0.0002	0.0216	0.0023	0.5052	0.0888		0.8599	0.09	0.7944	0	0.0203	0.0022	12.5752	6.7485		0.0032	0.0011	0.0166	0.0056	776.5	127.8	20874.6	3434.3	1043.7	171.7	0.037	0.192	0	9.28e-05	0.00421	0.0025
122	16	trout	hexachlorobenzene	0.5255	0.0275	0.0493	0.0028	0.4226	0.0416	0.0127	0.0012	0.0536	0.0066	565.1	28.03	543.98	26.99	0.016	0.0008	0.0135	0.0015	0.0043	0.0076		0.8798	0.097	0.7944	0	0.0078	0.001	0.4076	0.244		0.2366	0.0151	0.7542	0.048	10153.2	1351.6	168373	22413.4	8418.6	1120.7	0.06	0.192	0	0.00637	0.0296	0.106
123	16	trout	2,2,4,4,6,8,8-heptamethylnonane	0.4454	0.0219	0.0351	0.0026	0.0276	0.0034	0.0008	0.0001	0.0391	0.008	565.19	28.05	116.14	5.76	0.0001	0	0.0098	0.0009	0.004	0.0084		0.638	0.0566	0.7944	0	0.0095	0.0008	21.7169	3.4628		0.0211	0.0025	0.0674	0.0079	2969.2	627.6	49239.7	10407.7	2462	520.4	0.06	0.192	0	0.00155	0.00658	0.0256
124	16	trout	2-isopropyldecalin	0.5258	0.0276	0.0629	0.0031	0.1497	0.0469	0.0045	0.0014	0.2518	0.0234	565.04	28.03	551.64	27.36	0.026	0.0013	0.0135	0.0015	0.1888	0.0241		0.8809	0.0974	0.7944	0	0.0115	0.0014	4.2071	1.9227		0.0178	0.0043	0.0569	0.0137	2191.2	231.5	36336.7	3839.1	1816.8	192	0.06	0.192	0	0.000766	0.0152	0.0127
125	16	trout	n-octylbenzene	0.5232	0.0269	0.0395	0.0035	0.2729	0.1689	0.0082	0.0051	0.6909	0.1186	565.16	28.04	496.33	24.63	0.0043	0.0002	0.0133	0.0014	0.6514	0.1206		0.8719	0.0942	0.7944	0	0.0097	0.0025	1.5287	1.9936		0.0118	0.0057	0.0378	0.0182	718.4	128.7	11914.2	2134.9	595.7	106.7	0.06	0.192	0	0.00107	0.059	0.0178
126	16	trout	4-ethylbiphenyl	0.5262	0.0277	0.1656	0.008	0.7028	0.2586	0.0211	0.0078	1.9553	0.1331	564.42	27.95	561.69	27.81	0.1362	0.0067	0.0135	0.0015	1.7896	0.1361		0.8824	0.098	0.7944	0	0.0064	0.0035	0	0.4639	ID	0.0108	0.0034	0.0344	0.0109	287.3	24.2	4762.9	401.7	238.1	20.1	0.06	0.192	0	0.000697	0.107	0.0116
127	16	trout	2,7-diisopropylnaphthalene	0.5245	0.0272	0.0358	0.0034	0.766	0.17	0.023	0.0051	1.5211	0.077	565.15	28.04	520.95	25.85	0.0072	0.0004	0.0134	0.0015	1.4853	0.0789		0.8762	0.0957	0.7944	0	0.0064	0.0023	0	0.2556	ID	0.0151	0.0028	0.0482	0.0088	342.5	24.3	5679.7	403.3	284	20.2	0.06	0.192	0	0.00054	0.0651	0.00895
128	16	trout	anthracene	0.5263	0.0277	0.3365	0.0154	0.4925	0.1733	0.0148	0.0052	1.5845	0.1231	563.47	27.82	562.22	27.76	0.3042	0.015	0.0135	0.0015	1.2479	0.1259		0.8826	0.098	0.7944	0	0.0069	0.0025	0.1151	0.6388		0.0093	0.0027	0.0297	0.0087	354.8	32.7	5881.5	542.5	294.1	27.1	0.06	0.192	0	0.000882	0.11	0.0146
129	16	trout	o-terphenyl	0.5258	0.0276	0.0622	0.003	0.2032	0.0324	0.0061	0.001	0.1109	0.0111	565.04	28.03	551.64	27.36	0.026	0.0013	0.0135	0.0015	0.0487	0.0118		0.8809	0.0974	0.7944	0	0.0107	0.0013	2.6591	0.7898		0.055	0.005	0.1752	0.016	4972.9	556.2	82466.1	9223.6	4123.3	461.2	0.06	0.192	0	0.00402	0.0358	0.0667
130	16	trout	fluoranthene	0.5261	0.0276	0.0904	0.0058	0.5981	0.3244	0.0179	0.0097	1.6006	0.19	564.85	28	558.78	27.7	0.0595	0.0029	0.0135	0.0015	1.5102	0.1936		0.8819	0.0978	0.7944	0	0.0064	0.0044	0	0.8023	ID	0.0112	0.0051	0.0357	0.0162	349.1	45	5788.9	746.7	289.4	37.3	0.06	0.192	0	0.000735	0.0925	0.0122
131	16	trout	benzo[b]fluorene	0.5254	0.0275	0.041	0.0061	0.9301	0.4078	0.0279	0.0122	1.9196	0.1582	565.1	28.04	542.09	26.89	0.0146	0.0007	0.0135	0.0015	1.8786	0.1626		0.8795	0.0969	0.7944	0	0.0064	0.0055	0	0.4147	ID	0.0145	0.0055	0.0463	0.0175	282.4	27.2	4683.1	451.5	234.2	22.6	0.06	0.192	0	0.00037	0.0561	0.00614
132	16	trout	triphenylene	0.5258	0.0276	0.0611	0.0044	0.4204	0.2404	0.0126	0.0072	1.4096	0.1957	565.03	28.03	552.48	27.4	0.0278	0.0014	0.0135	0.0015	1.3485	0.1984		0.881	0.0975	0.7944	0	0.0078	0.0034	0.4204	1.2061		0.0089	0.0042	0.0285	0.0133	391.9	57.9	6499.4	960.7	325	48	0.06	0.192	0	0.00077	0.0853	0.0128
133	16	trout	7-methylbenz[a]anthracene	0.5245	0.0272	0.0443	0.0031	0.1447	0.1016	0.0043	0.003	1.1892	0.2317	565.15	28.04	521.85	25.89	0.0073	0.0004	0.0134	0.0015	1.145	0.2329		0.8763	0.0957	0.7944	0	0.0115	0.0019	4.3861	4.2893		0.0036	0.002	0.0116	0.0064	438.8	88.5	7277	1467.1	363.9	73.4	0.06	0.192	0	0.000174	0.0164	0.00289
134	16	trout	benzo[k]fluoranthene	0.5243	0.0272	0.0434	0.0033	0.1628	0.1327	0.0049	0.004	1.1853	0.2689	565.15	28.04	518.14	25.71	0.0067	0.0003	0.0134	0.0015	1.1419	0.2704		0.8757	0.0955	0.7944	0	0.0112	0.0022	3.7094	4.4132		0.0041	0.0026	0.0131	0.0084	437.2	101.8	7249.5	1688.2	362.5	84.4	0.06	0.192	0	0.000185	0.0173	0.00307
135	17	trout	1-heptadecyne	0.4227	0.0245	0.0434	0.0021	0.2207	0.0225	0.0066	0.0007	0.0677	0.0067	592.89	25.01	96.1	4.05	0.0002	0	0.0133	0.0013	0.0243	0.0073		0.5817	0.0584	0.7944	0	0.0103	0.0011	1.2595	0.3385		0.0978	0.0053	0.4595	0.0247	1419.3	152.7	34701	3732.7	1735.1	186.6	0.041	0.192	0	0.00619	0.0518	0.151
136	17	trout	1,1':3',1"-tercyclohexane	0.2573	0.0397	0.0385	0.0022	0.1229	0.0102	0.0037	0.0003	0.0691	0.0053	592.89	25.01	26.81	1.13	0	0	0.0063	0.0013	0.0306	0.0058		0.2752	0.0572	0.7944	0	0.0055	0.0011	1.1686	0.4479		0.0534	0.0024	0.251	0.0114	388.3	34.2	9493.1	836.2	474.7	41.8	0.041	0.192	0	0.00369	0.0645	0.0901
137	17	trout	dicyclohexylbenzene	0.4675	0.0206	0.0481	0.0022	0.066	0.0105	0.002	0.0003	0.1571	0.011	592.89	25.01	160.03	6.75	0.0003	0	0.0159	0.0013	0.109	0.0113		0.6976	0.0578	0.7944	0	0.0148	0.0012	9.0728	1.8702		0.0126	0.0014	0.0593	0.0064	1018.7	83.3	24907.5	2036	1245.4	101.8	0.041	0.192	0	0.00103	0.0161	0.0252
138	17	trout	cyclohexylbiphenyl	0.5206	0.0263	0.049	0.0028	0.3656	0.0832	0.011	0.0025	0.8687	0.0814	592.87	25.01	472.99	19.95	0.0036	0.0002	0.0197	0.0021	0.8197	0.0829		0.8628	0.091	0.7944	0	0.0125	0.0021	0.7028	0.5601		0.0126	0.0019	0.0593	0.0089	544.5	56.1	13311.9	1371.3	665.6	68.6	0.041	0.192	0	0.000942	0.0659	0.023
139	17	trout	m-terphenyl	0.5258	0.0276	0.0841	0.0045	0.4691	0.1761	0.0141	0.0053	1.3687	0.1552	592.73	24.99	578.68	24.39	0.0406	0.0017	0.0201	0.0022	1.2846	0.1583		0.8809	0.0974	0.7944	0	0.0107	0.0037	0.2027	0.7135		0.0103	0.0029	0.0483	0.0138	422.8	51.3	10336.7	1253.7	516.8	62.7	0.041	0.192	0	0.000465	0.0501	0.0114
140	17	trout	dodecahydrochrysene	0.5131	0.0247	0.0501	0.0025	0.179	0.028	0.0054	0.0008	0.1712	0.0109	592.88	25.01	375.43	15.83	0.0015	0.0001	0.0191	0.0019	0.121	0.0116		0.8373	0.0829	0.7944	0	0.0157	0.0016	3.0462	0.8247		0.0314	0.0034	0.1474	0.0159	2193.2	167.9	53624.5	4105.9	2681.2	205.3	0.041	0.192	0	0.00131	0.0189	0.0321
141	17	trout	hexahydrochrysene	0.5187	0.0259	0.0456	0.0044	0.488	0.1967	0.0146	0.0059	1.4029	0.1682	592.88	25.01	442.82	18.68	0.0027	0.0001	0.0195	0.002	1.3573	0.1715		0.856	0.0888	0.7944	0	0.01	0.004	0.1037	0.7132		0.0104	0.0032	0.049	0.0151	315.6	40.2	7717.4	983.2	385.9	49.2	0.041	0.192	0	0.00094	0.107	0.023
142	17	trout	octahydrochrysene	0.5075	0.0237	0.0424	0.0033	0.5473	0.1389	0.0164	0.0042	1.3846	0.1054	592.88	25.01	324.33	13.68	0.0011	0	0.0187	0.0018	1.3421	0.1077		0.8186	0.0775	0.7944	0	0.0092	0.0027	0	0.3849	ID	0.0119	0.0023	0.0557	0.0107	234.2	20.4	5727.3	499.6	286.4	25	0.041	0.192	0	0.000759	0.0892	0.0186
143	17	trout	chrysene	0.5253	0.0275	0.0694	0.0032	0.2161	0.0836	0.0065	0.0025	0.7846	0.0752	592.81	25	566.51	23.89	0.0208	0.0009	0.02	0.0022	0.7152	0.0766		0.8792	0.0968	0.7944	0	0.0157	0.0024	2.394	1.6119		0.0083	0.0026	0.0388	0.0121	722	75.8	17653.3	1853.1	882.7	92.7	0.041	0.192	0	0.000443	0.0274	0.0108
144	17	trout	benzo[c]chrysene	0.5071	0.0236	0.0426	0.0028	0.5368	0.1023	0.0161	0.0031	1.328	0.0782	592.88	25.01	321.05	13.54	0.001	0	0.0186	0.0018	1.2854	0.0799		0.8172	0.0772	0.7944	0	0.0092	0.0021	0	0.2976	ID	0.0121	0.0017	0.057	0.0082	241.7	17.5	5910.7	428.9	295.5	21.4	0.041	0.192	0	0.000342	0.0387	0.00837
145	18	trout	hexachlorobenzene	0.5255	0.0275	0.0819	0.0024	0.4258	0.0362	0.0128	0.0011	0.0931	0.0053	611.21	26.7	588.37	25.71	0.0276	0.0012	0.0215	0.0024	0.0112	0.0064		0.8798	0.097	0.7944	0	0.0123	0.0016	0.3918	0.2189		0.1372	0.0065	0.6887	0.0327	6320.4	454.7	165016	11872.3	8250.8	593.6	0.038	0.192	0	0.00338	0.0271	0.0881
146	18	trout	perhydrochrysene	0.5236	0.027	0.0687	0.0025	0.1482	0.0177	0.0044	0.0005	0.097	0.0076	611.28	26.71	545.15	23.82	0.0085	0.0004	0.0213	0.0023	0.0283	0.0083		0.8733	0.0947	0.7944	0	0.0181	0.002	4.2265	0.8897		0.0458	0.003	0.2301	0.0151	5623	504.7	146814	13177.9	7340.7	658.9	0.038	0.192	0	0.00624	0.0493	0.163
147	18	trout	fluoranthene	0.5261	0.0276	0.1611	0.0056	0.2256	0.1157	0.0068	0.0035	0.7165	0.0917	610.94	26.67	604.38	26.38	0.1025	0.0045	0.0215	0.0024	0.5554	0.094		0.8819	0.0978	0.7944	0	0.0167	0.0031	2.2329	2.033		0.0094	0.0039	0.0474	0.0194	843.5	114.4	22019	2986.8	1100.9	149.3	0.038	0.192	0	0.000822	0.0464	0.0215
148	18	trout	benzo[b]fluorene	0.5254	0.0275	0.0857	0.0034	0.1379	0.0957	0.0041	0.0029	0.8234	0.129	611.22	26.7	586.33	25.62	0.0252	0.0011	0.0214	0.0024	0.7378	0.1308		0.8795	0.0969	0.7944	0	0.0185	0.0029	4.7021	4.4645		0.005	0.0029	0.0252	0.0143	712	116.1	18590.5	3032.3	929.5	151.6	0.038	0.192	0	0.000213	0.0138	0.00556
149	18	trout	6-methylchrysene	0.5245	0.0272	0.0703	0.0031	0.2658	0.0957	0.008	0.0029	0.9563	0.0687	611.26	26.71	564.43	24.66	0.0126	0.0006	0.0214	0.0023	0.886	0.0704		0.8763	0.0957	0.7944	0	0.0157	0.0027	1.6264	1.216		0.0083	0.0025	0.0418	0.0127	590.2	49.7	15410.2	1298.2	770.5	64.9	0.038	0.192	0	0.000409	0.0309	0.0107
150	18	trout	6-ethylchrysene	0.5207	0.0264	0.0645	0.003	0.1248	0.0875	0.0037	0.0026	0.5908	0.1213	611.29	26.71	489.87	21.41	0.0041	0.0002	0.021	0.0022	0.5263	0.123		0.8632	0.0912	0.7944	0	0.0184	0.0027	5.2572	4.8867		0.0063	0.0034	0.0318	0.0169	829.2	174.6	21648.8	4559	1082.4	227.9	0.038	0.192	0	0.000468	0.0222	0.0122
151	19	trout	hexachlorobenzene	0.5255	0.0275	0.0626	0.0021	0.7664	0.0785	0.023	0.0024	0.0625	0.0048	591.22	31.32	569.13	30.15	0.0182	0.001	0.0145	0.0016	0	0.006	ID	0.8924	0.0984	0.8059	0	0.0069	0.0012	0	0.123	ID	0.3678	0.019	1.2337	0.0636	9104.1	847.4	163738	15240.5	8186.9	762	0.056	0.187	0	0.00527	0.03	0.0948
152	19	trout	musk xylene	0.5263	0.0277	0.395	0.0183	0.4293	0.0525	0.0129	0.0016	0.1049	0.0059	589.52	31.1	588.22	31.03	0.3458	0.0182	0.0145	0.0016	0	0.0195	ID	0.8952	0.0994	0.8059	0	0.0083	0.0012	0.3844	0.2873		0.1227	0.0096	0.4115	0.0322	5606.4	431.6	100779	7759.2	5038.9	388	0.056	0.187	0	0.00178	0.0551	0.0321
153	19	trout	o-terphenyl	0.5258	0.0276	0.0799	0.0029	0.3514	0.1125	0.0105	0.0034	0.1333	0.0158	591.16	31.31	577.15	30.57	0.0295	0.0016	0.0145	0.0016	0.0534	0.0174		0.8936	0.0988	0.8059	0	0.0094	0.0019	0.8433	0.8341		0.0791	0.0177	0.2652	0.0592	4328.7	562.5	77850.6	10116.5	3892.5	505.8	0.056	0.187	0	0.0036	0.0384	0.0647
154	19	trout	methoxychlor	0.5261	0.0277	0.1347	0.0048	0.1452	0.0442	0.0044	0.0013	0.2254	0.0204	590.9	31.28	585.57	31	0.0813	0.0043	0.0145	0.0016	0.0907	0.0215		0.8947	0.0992	0.8059	0	0.0124	0.0015	4.4597	1.9654		0.0193	0.0045	0.0648	0.015	2597.9	273.1	46718.2	4911.5	2335.9	245.6	0.056	0.187	0	0.00187	0.0328	0.0337
155	19	trout	benzo[a]pyrene	0.5242	0.0272	0.0598	0.003	0.201	0.1629	0.006	0.0049	0.9242	0.1421	591.28	31.33	540.05	28.61	0.0072	0.0004	0.0144	0.0016	0.8644	0.1442		0.8879	0.0968	0.8059	0	0.0115	0.0027	2.724	3.6019		0.0065	0.0044	0.0219	0.0148	584.4	95.3	10510.1	1713.8	525.5	85.7	0.056	0.187	0	0.000985	0.0709	0.0177
156	20	trout	diisopheptyl phthalate	0.4893	0.0213	0.0619	0.0024	0.0503	0.028	0.0015	0.0008	0.4041	0.0861	796.16	37.02	299.9	13.94	0.0006	0	0.0157	0.0013	0.3422	0.0865		0.7719	0.0658	0.8059	0	0.0149	0.0013	13.7578	8.6287		0.0037	0.0015	0.0157	0.0063	742.1	162.4	16677.4	3648.5	833.9	182.4	0.045	0.187	0	0.00404	0.146	0.0907
157	21	trout	C9-12 isoalkanes (solvent mixture)	0.5263	0.0277	0.4528	0.0179	0.0899	0.011	0.0027	0.0003	0.1591	0.0117	708.46	32.45	706.21	32.34	0.3861	0.0177	0.0197	0.0022	0	0.0215	ID	0.8825	0.098	0.7944	0	0.0179	0.002	8.1417	1.5626		0.0169	0.0012	0.0781	0.0053	4438.4	386.5	106382	9263.8	5319.1	463.2	0.042	0.192	0	0.00594	0.211	0.142
158	22	trout	deuterated di-2-ethylexyl phthalate	0.471	0.0206	0.0452	0.0069	1.3263	0.2583	0.0398	0.0077	3.512	0.2563	840.93	46.47	238.26	13.17	0.0007	0	0.0234	0.0019	3.4668	0.2614		0.7075	0.0584	0.7944	0	0.0124	0.0061	0	0.1049	ID	0.0113	0.0016	0.0764	0.0107	67.8	6.2	2380.4	218.4	119	10.9	0.029	0.192	0	0.00037	0.128	0.013
159	23	trout	diisononyl adipate	0.086	0.0228	0.0442	0.0062	0.0212	0.0108	0.0006	0.0003	1.057	0.2036	465.48	18.93	4.67	0.19	0	0	0.0015	0.0004	1.0128	0.2037		0.0747	0.0217	0.7944	0	0.0015	0.0004	2.6566	2.062		0.0006	0.0002	0.0025	0.0009	4.4	0.9	95.1	18.8	4.8	0.9	0.047	0.192	0	0.000308	0.3	0.00662
160	23	trout	diisotridecyl adipate	0	0	0.0427	0.0062	0.0291	0.0156	0.0009	0.0005	0.968	0.207	465.48	18.93	0	0	0	0	0	0	0.9253	0.2071		0	0	0.7944	0	0	0	0	0.0002	ID	0.0009	0.0003	0.0037	0.0014	0	0	0	0	0	0	0.047	0.192	0	1.84e-07	1.28	3.96e-06
161	23	trout	diisotridecyl phthalate	0.0001	0	0.0427	0.0062	0.0378	0.0207	0.0011	0.0006	1.1028	0.2216	465.48	18.93	0.01	0	0	0	0	0	1.0601	0.2216		0.0001	0	0.7944	0	0	0	0	0.0013	ID	0.001	0.0004	0.0042	0.0017	0	0	0.1	0	0	0	0.047	0.192	0	1.53e-06	1.46	3.3e-05
162	24	trout	diundecyl phthalate	0.0003	0.0001	0.0112	0.0045	0.1093	0.0253	0.0033	0.0008	3.7512	0.2516	492.49	20.17	0.02	0	0	0	0	0	3.74	0.2516		0.0002	0.0001	0.7944	0	0	0	0	0.0007	ID	0.0009	0.0002	0.0044	0.0008	0	0	0.1	0	0	0	0.038	0.192	0	2.09e-06	2.57	5.47e-05
163	25	trout	hexachlorobenzene	0.5255	0.0275	0.085	0.0032	0.4574	0.0781	0.0069	0.0012	0.0783	0.0081	679.72	29.66	654.32	28.55	0.0534	0.0023	0.0185	0.002	0	0.0098	ID	0.8924	0.0984	0.8059	0	0.01	0.0018	0.2526	0.3529		0.0876	0.0092	0.7259	0.0763	8351.6	944.3	371156	41963.9	18557.8	2098.2	0.023	0.187	0	0.00293	0.0423	0.13
164	25	trout	trans-decalin	0.5262	0.0277	0.4973	0.0207	0.3904	0.2215	0.0059	0.0033	0.4748	0.1034	678.89	29.55	675.67	29.41	0.4645	0.0202	0.0185	0.0021	0	0.109	ID	0.8951	0.0994	0.8059	0	0.0113	0.0043	0.592	1.3105		0.0123	0.0048	0.1022	0.0394	1423.1	317	63206.6	14080.3	3160.3	704	0.023	0.187	0	0.000697	0.0542	0.031
165	25	trout	dihexyldisulfide	0.5171	0.0256	0.043	0.0022	0.062	0.0278	0.0009	0.0004	0.3299	0.0718	679.82	29.68	483.8	21.12	0.0048	0.0002	0.0179	0.0018	0.2869	0.0723		0.863	0.0883	0.8059	0	0.0168	0.0018	12.2573	6.3804		0.0028	0.0007	0.0234	0.0061	1466.3	326.4	65169.3	14506.4	3258.5	725.3	0.023	0.187	0	0.00029	0.0154	0.0129
166	25	trout	9-ethylcarbazole	0.5263	0.0277	1.5692	0.0662	0.1002	0.0484	0.0015	0.0007	0.4896	0.119	676.72	29.26	675.71	29.21	1.5311	0.0662	0.0185	0.0021	0	0.1369	ID	0.8953	0.0995	0.8059	0	0.0166	0.0021	7.2334	4.4112		0.0031	0.0008	0.0254	0.0069	1380.3	341.8	61214.9	15157.2	3060.7	757.9	0.023	0.187	0	5.8e-05	0.014	0.00257
167	26	trout	1,2,4,5-tetrachlorobenzene	0.5456	0.1509	0.0454	0.0157	0.5456	0.1509	0.0065	0.0014	0.0454	0.0157	191.86	27.98	191.21	27.88	0.0562	0.0082	0.0064	0.004	0	0.0222	ID	1.1608	0.7065	0.967	0	0.0029	0.0022	0	0.8323	ID	0.1443	0.029	0.455	0.0915	4215	1581	58935	22105.5	2946.8	1105.3	0.072	0.226	0	0.0018	0.0185	0.0252
168	26	trout	pentachlorobenzene	0.5645	0.1062	0.0237	0.0018	0.5645	0.1062	0.0068	0.0006	0.0237	0.0018	191.83	27.97	189.72	27.67	0.0166	0.0024	0.0069	0.0032	0	0.0025	ID	1.2535	0.5416	0.967	0	0.003	0.0018	0	0.5908	ID	0.2857	0.0195	0.9011	0.0615	8002.8	1308.2	111918	18294.4	5595.9	914.7	0.072	0.226	0	0.0137	0.0566	0.191
169	26	trout	hexachlorobenzene	0.5106	0.098	0.0088	0.0019	0.5106	0.098	0.0061	0.0006	0.0088	0.0019	191.82	27.97	184.65	26.93	0.0046	0.0007	0.0055	0.0024	0	0.0026	ID	1.0089	0.3956	0.967	0	0.0027	0.0014	0	0.5362	ID	0.6936	0.1147	2.1875	0.3617	20902.3	5361.2	292333	74980.6	14616.7	3749	0.072	0.226	0	0.00388	0.0111	0.0543
170	26	trout	2,2',5,5'-PCB (PCB 52)	0.3981	0.0785	0.0028	0.002	0.3981	0.0785	0.0048	0.0005	0.0028	0.002	191.82	27.97	176.19	25.69	0.002	0.0003	0.0035	0.0013	0	0.0028	ID	0.6397	0.2095	0.967	0	0.0021	0.0009	0	0.4478	ID	1.7279	1.1349	5.4496	3.5792	63720.3	46927.6	891184	656323	44559.2	32816.2	0.072	0.226	0	0.0056	0.0182	0.0783
171	26	trout	2,2',4,4',6,6'-PCB (PCB 155)	0.4379	0.0864	0.0012	0.0022	0.4379	0.0864	0.0053	0.0006	0.0012	0.0022	191.82	27.97	115.39	16.83	0.0002	0	0.0041	0.0016	0	0.003	ID	0.7532	0.2645	0.967	0	0.0023	0.0011	0	0.4802	ID	4.4719	7.8892	14.1036	24.8813	98208.5	180520	1.37354e+06	2.52476e+06	68677.2	126238	0.072	0.226	0	0.00716	0.018	0.1
172	26	trout	2,2',4,4',5,5'-PCB (PCB 153)	0.4418	0.087	0.0007	0.0021	0.4418	0.087	0.0053	0.0006	0.0007	0.0021	191.82	27.97	125.39	18.29	0.0003	0	0.0042	0.0016	0	0.003	ID	0.7654	0.2701	0.967	0	0.0023	0.0011	0	0.4827	ID	7.6504	22.9134	24.1281	72.2653	180945	554952	2.5307e+06	7.76155e+06	126535	388078	0.072	0.226	0	0.00716	0.0179	0.1
173	26	trout	2,2',3,3',4,4',5,5',6,6'-PCB (PCB 209)	0.3137	0.0614	0.0011	0.0021	0.3137	0.0614	0.0038	0.0004	0.0011	0.0021	191.82	27.97	15.92	2.32	0	0	0.0024	0.0008	0	0.003	ID	0.4421	0.1262	0.967	0	0.0017	0.0006	0	0.3903	ID	3.4477	6.4905	10.8734	20.4699	14581.3	28481.1	203935	398336	10196.7	19916.8	0.072	0.226	0	0.00568	0.02	0.0795
174	26	trout	1,2,3,4-tetramethylbenzene	0.5263	0.0277	0.2479	0.035	0.5433	0.3243	0.0065	0.0037	0.3559	0.1013	192.02	28	191.87	27.98	0.2455	0.0358	0.0059	0.0012	0.108	0.1072		1.0744	0.1194	0.967	0	0.0028	0.0021	0	1.1847	ID	0.0183	0.0061	0.0577	0.0192	539.2	172.5	7531.8	2409.6	376.6	120.5	0.072	0.226	0	0.00209	0.123	0.0292
175	26	trout	trans-decalin	0.5262	0.0277	0.0422	0.0052	0.2271	0.0445	0.0027	0.0003	0.0382	0.0025	191.85	27.98	190.94	27.84	0.0398	0.0058	0.0059	0.0012	0	0.0058	ID	1.074	0.1192	0.967	0	0.0046	0.0011	2.6873	1.0104		0.0713	0.0054	0.2249	0.0171	4997	799.9	69875.2	11185.4	3493.8	559.3	0.072	0.226	0	0.0267	0.224	0.373
176	26	trout	9-methylanthracene	0.5261	0.0277	0.0233	0.0027	0.1769	0.098	0.0021	0.0011	0.407	0.0996	191.83	27.97	190.14	27.73	0.0209	0.003	0.0059	0.0012	0.3837	0.0996		1.0737	0.1191	0.967	0	0.0049	0.0012	4.0282	3.406		0.0052	0.0017	0.0164	0.0055	467.2	133.1	6533.7	1861.5	326.7	93.1	0.072	0.226	0	0.000658	0.0441	0.00921
177	26	trout	chrysene	0.5253	0.0275	0.0062	0.0014	0.0883	0.0476	0.0011	0.0005	0.3903	0.118	191.82	27.97	183.31	26.73	0.0038	0.0006	0.0059	0.0012	0.3841	0.118		1.0701	0.1178	0.967	0	0.0054	0.0012	10.0811	6.647		0.0027	0.0007	0.0086	0.0024	469.7	157.6	6568.5	2204.2	328.4	110.2	0.072	0.226	0	7.47e-05	0.00482	0.00105
178	26	trout	n-hexylcyclohexane	0.5246	0.0273	0.0046	0.0015	0.1068	0.0363	0.0013	0.0004	0.0426	0.0197	191.82	27.97	177.72	25.92	0.0022	0.0003	0.0059	0.0012	0.038	0.0198		1.067	0.1167	0.967	0	0.0052	0.0011	7.9556	3.5295		0.0301	0.0083	0.095	0.0263	4175.9	2027.3	58403.3	28353.7	2920.2	1417.7	0.072	0.226	0	0.012	0.102	0.168
179	26	trout	2,6-dimethyldecane	0.5244	0.0272	0.0044	0.0015	0.3599	0.1383	0.0043	0.0015	0.184	0.0427	191.82	27.97	176.5	25.74	0.002	0.0003	0.0059	0.0012	0.1796	0.0427		1.0663	0.1164	0.967	0	0.0037	0.0013	0.9292	1.1571		0.0235	0.0036	0.074	0.0115	959.2	262.9	13414.6	3676.5	670.7	183.8	0.072	0.226	0	0.0107	0.336	0.15
180	26	trout	benzo[a]pyrene	0.5242	0.0272	0.0042	0.0015	0.0162	0.0066	0.0002	0.0001	0.0939	0.0306	191.82	27.97	175.2	25.55	0.0018	0.0003	0.0059	0.0012	0.0897	0.0306		1.0655	0.1161	0.967	0	0.0058	0.0012	63.9167	27.8809		0.0021	0.0005	0.0065	0.0017	1865.7	666.2	26094.1	9317.7	1304.7	465.9	0.072	0.226	0	5.19e-05	0.000873	0.000726
181	27	carp	hexachlorobenzene	0.5255	0.0275	0.0672	0.0034	0.1478	0.0261	0.0044	0.0008	0.0348	0.0118	651.62	28.69	627.26	27.62	0.0278	0.0012	0.0203	0.0022	0	0.0127	ID	0.8798	0.097	0.7944	0	0.0173	0.002	4.2766	1.1885		0.1273	0.0265	0.6057	0.126	18006.1	6143.8	445678	152068	22283.9	7603.4	0.04	0.192	0	0.00187	0.0103	0.0463
182	27	carp	2,2,4,4,6,8,8-heptamethylnonane	0.4454	0.0219	0.0367	0.0028	0.0175	0.0034	0.0005	0.0001	0.0271	0.0126	651.72	28.71	133.92	5.9	0.0002	0	0.0147	0.0013	0	0.013	ID	0.638	0.0566	0.7944	0	0.0145	0.0013	35.0651	7.75		0.0194	0.0061	0.0921	0.0291	4941.7	2317.5	122320	57363	6116	2868.2	0.04	0.192	0	0.00115	0.00459	0.0284
183	27	carp	2-isopropyldecalin	0.5258	0.0276	0.087	0.0039	0.0244	0.0111	0.0007	0.0003	0.0715	0.0569	651.55	28.68	636.1	28	0.0452	0.002	0.0203	0.0022	0	0.0572	ID	0.8809	0.0974	0.7944	0	0.0198	0.0022	34.4311	16.9071		0.0102	0.0041	0.0487	0.0194	8902.4	7113.1	220341	176055	11017.1	8802.7	0.04	0.192	0	0.000394	0.0027	0.00974
184	27	carp	n-octylbenzene	0.5232	0.0269	0.0495	0.0033	0.0085	0.0027	0.0003	0.0001	0.1436	0.0298	651.69	28.7	572.32	25.21	0.0075	0.0003	0.0201	0.0022	0.0941	0.03		0.8719	0.0942	0.7944	0	0.02	0.0022	100.69	33.7674		0.0018	0.0003	0.0085	0.0014	3986.4	848.3	98671.5	20996.1	4933.6	1049.8	0.04	0.192	0	0.00017	0.00194	0.00422
185	27	carp	4-ethylbiphenyl	0.5262	0.0277	0.2777	0.0109	0.0648	0.0273	0.0019	0.0008	1.0836	0.1632	650.84	28.59	647.69	28.45	0.2366	0.0104	0.0204	0.0023	0.8059	0.1641		0.8824	0.098	0.7944	0	0.019	0.0022	11.9433	5.911		0.0018	0.0005	0.0085	0.0025	597.7	94	14790.5	2326.3	739.5	116.3	0.04	0.192	0	0.000165	0.014	0.00409
186	27	carp	2,7-diisopropylnaphthalene	0.5245	0.0272	0.0542	0.0034	0.0217	0.0052	0.0007	0.0002	0.1061	0.0222	651.67	28.7	600.71	26.46	0.0124	0.0005	0.0202	0.0022	0.0519	0.0226		0.8762	0.0957	0.7944	0	0.0198	0.0022	38.6202	10.5795		0.0061	0.0007	0.0292	0.0034	5661.1	1214.4	140123	30057.8	7006.1	1502.9	0.04	0.192	0	0.000333	0.00279	0.00823
187	27	carp	anthracene	0.5263	0.0277	0.5668	0.0234	0.2081	0.07	0.0062	0.0021	2.2764	0.3155	649.74	28.44	648.3	28.38	0.5287	0.0231	0.0204	0.0023	1.7096	0.3176		0.8826	0.098	0.7944	0	0.0161	0.0023	2.5648	1.475		0.0027	0.0006	0.013	0.0029	284.8	41.5	7043.8	1026.1	352.2	51.3	0.04	0.192	0	0.000269	0.0479	0.00665
188	27	carp	o-terphenyl	0.5258	0.0276	0.0858	0.0038	0.0847	0.0238	0.0025	0.0007	0.3394	0.0304	651.55	28.68	636.1	28	0.0452	0.002	0.0203	0.0022	0.2536	0.0311		0.8809	0.0974	0.7944	0	0.0186	0.0021	8.7285	3.1106		0.0075	0.0016	0.0356	0.0076	1874.4	187.6	46391.9	4644.2	2319.6	232.2	0.04	0.192	0	0.000576	0.0154	0.0143
189	27	carp	fluoranthene	0.5261	0.0276	0.1446	0.0057	0.0561	0.0297	0.0017	0.0009	1.327	0.2178	651.33	28.65	644.33	28.35	0.1034	0.0045	0.0204	0.0023	1.1824	0.2184		0.8819	0.0978	0.7944	0	0.0192	0.0022	14.0374	8.4875		0.0013	0.0005	0.006	0.0024	485.5	82.7	12016.4	2046.9	600.8	102.3	0.04	0.192	0	0.000112	0.0116	0.00277
190	27	carp	benzo[b]fluorene	0.5254	0.0275	0.0628	0.0036	0.241	0.073	0.0072	0.0022	3.0828	0.3136	651.62	28.69	625.09	27.53	0.0254	0.0011	0.0203	0.0022	3.02	0.3148		0.8795	0.0969	0.7944	0	0.0154	0.0023	1.9761	1.1468		0.0023	0.0005	0.0112	0.0025	202.8	22.5	5018.8	557.5	250.9	27.9	0.04	0.192	0	0.000116	0.0282	0.00288
191	27	carp	triphenylene	0.5258	0.0276	0.0876	0.004	0.1518	0.055	0.0046	0.0017	1.1889	0.1445	651.54	28.68	637.07	28.05	0.0484	0.0021	0.0203	0.0022	1.1012	0.1455		0.881	0.0975	0.7944	0	0.0172	0.0022	4.1296	2.1744		0.0038	0.001	0.0182	0.0048	535.9	69.4	13262.8	1718.2	663.1	85.9	0.04	0.192	0	0.000357	0.0333	0.00883
192	27	carp	7-methylbenz[a]anthracene	0.5245	0.0272	0.0509	0.0034	0.2005	0.0597	0.006	0.0018	2.7272	0.2973	651.67	28.7	601.74	26.5	0.0127	0.0006	0.0202	0.0022	2.6763	0.2984		0.8763	0.0957	0.7944	0	0.0162	0.0021	2.6997	1.3569		0.0022	0.0005	0.0105	0.0022	220.6	26	5461.4	643.6	273.1	32.2	0.04	0.192	0	0.000106	0.0228	0.00263
193	27	carp	benzo[k]fluoranthene	0.5243	0.0272	0.0527	0.0033	0.0579	0.0209	0.0017	0.0006	0.9449	0.1335	651.68	28.7	597.47	26.31	0.0116	0.0005	0.0202	0.0022	0.8923	0.1339		0.8757	0.0955	0.7944	0	0.019	0.0021	13.4652	5.6722		0.0018	0.0004	0.0087	0.0021	632.3	93.8	15650.7	2321.5	782.5	116.1	0.04	0.192	0	8.91e-05	0.00664	0.00221
194	28	fathead minnow	2,2,4,6,6-pentamethylheptane	0.525	0.0274	0.0234	0.0115	0.0534	0.0142	0.0021	0.0006	0.1844	0.0298	899.07	46.89	846.53	44.15	0.0095	0.0005	0.0109	0.0012	0.161	0.0321		0.878	0.0963	0.7944	0	0.0103	0.0011	14.7587	4.6852		0.0116	0.0018	0.0226	0.0034	4591.2	782.9	46610.7	7948.6	2330.5	397.4	0.099	0.192	0	0.012	0.131	0.122
195	29	trout	hexachlorobenzene	0.5255	0.0275	0.0354	0.002	0.1573	0.0508	0.0024	0.0008	0.0145	0.004	427.41	16.34	411.44	15.73	0.0162	0.0006	0.0105	0.0012	0	0.0048	ID	1.177	0.1298	1.0628	0	0.0088	0.0011	5.2448	2.5139		0.1625	0.0364	0.6357	0.1424	28342.6	7906.6	622892	173764	31144.6	8688.2	0.046	0.178	0	6.84e-06	2.97e-05	0.00015
196	29	trout	mirex	0.5145	0.025	0.0176	0.0017	0.3874	0.0407	0.0058	0.0006	0.009	0.0013	427.48	16.35	281.61	10.77	0.0011	0	0.01	0.001	0	0.0023	ID	1.1265	0.1128	1.0628	0	0.0061	0.0007	0.7184	0.354		0.6449	0.0635	2.5229	0.2486	31251.6	4545.8	686847	99907.9	34342.3	4995.4	0.046	0.178	0	4.76e-05	0.000125	0.00105
197	29	trout	2,2',5-PCB (PCB 18)	0.5257	0.0275	0.0403	0.002	0.2216	0.0254	0.0033	0.0004	0.0278	0.0011	427.39	16.33	415.33	15.87	0.0218	0.0008	0.0105	0.0012	0	0.0023	ID	1.178	0.1301	1.0628	0	0.0081	0.0009	3.0752	0.762		0.1195	0.0112	0.4673	0.0438	14926.1	833.8	328031	18325.5	16401.5	916.3	0.046	0.178	0	1.5e-05	7.49e-05	0.00033
198	29	trout	2,4,4'-PCB (PCB 28)	0.5253	0.0275	0.0322	0.002	0.2294	0.0675	0.0034	0.001	0.0129	0.0033	427.42	16.34	408.86	15.63	0.0138	0.0005	0.0104	0.0012	0	0.0043	ID	1.1763	0.1295	1.0628	0	0.0081	0.0011	2.8893	1.5716		0.2674	0.0534	1.046	0.2089	31775.7	8257.5	698346	181478	34917.3	9073.9	0.046	0.178	0	1.15e-05	4.69e-05	0.000254
199	29	trout	2,2',3,5'-PCB (PCB 44)	0.5248	0.0273	0.0269	0.0018	0.2542	0.0397	0.0038	0.0006	0.0176	0.0017	427.45	16.34	399.12	15.26	0.0087	0.0003	0.0104	0.0011	0	0.0027	ID	1.1736	0.1285	1.0628	0	0.0078	0.0009	2.3805	0.813		0.2161	0.0233	0.8455	0.0912	22624.8	2375.1	497238	52199.2	24861.9	2610	0.046	0.178	0	1.83e-05	6.35e-05	0.000403
200	29	trout	2,2',5,5'-PCB (PCB 52)	0.5244	0.0272	0.0247	0.0018	0.291	0.0438	0.0044	0.0007	0.0183	0.0016	427.45	16.34	392.62	15.01	0.0069	0.0003	0.0104	0.0011	0	0.0026	ID	1.1717	0.1279	1.0628	0	0.0074	0.0009	1.792	0.682		0.2381	0.0253	0.9313	0.099	21412.8	2087.7	470605	45882	23530.2	2294.1	0.046	0.178	0	2.21e-05	7.21e-05	0.000486
201	29	trout	2,3',4,4'-PCB (PCB 66)	0.5253	0.0275	0.0328	0.0019	0.1757	0.0485	0.0026	0.0007	0.0124	0.0032	427.42	16.34	408.86	15.63	0.0138	0.0005	0.0104	0.0012	0	0.004	ID	1.1763	0.1295	1.0628	0	0.0086	0.0011	4.4573	1.947		0.2125	0.0391	0.8311	0.1528	32966.3	8533.3	724513	187540	36225.6	9377	0.046	0.178	0	1.27e-05	5.16e-05	0.000279
202	29	trout	2,2',4,5,5'-PCB (PCB 101)	0.5224	0.0268	0.0227	0.0018	0.1397	0.026	0.0021	0.0004	0.012	0.0019	427.47	16.34	364.3	13.93	0.0035	0.0001	0.0103	0.0011	0	0.0027	ID	1.1627	0.1247	1.0628	0	0.0089	0.001	6.0986	1.7278		0.1753	0.0249	0.6859	0.0974	30483	4909.3	669951	107895	33497.5	5394.8	0.046	0.178	0	1.36e-05	3.91e-05	0.0003
203	29	trout	2,3,3',4,4'-PCB (PCB 105)	0.5248	0.0273	0.0162	0.0026	1.2809	0.2043	0.0192	0.0031	0.013	0.0018	427.45	16.34	399.12	15.26	0.0087	0.0003	0.0104	0.0011	0	0.004	ID	1.1736	0.1285	1.0628	0	0.005	0.0022	0	0.1488	ID	1.4746	0.1538	5.7688	0.6018	30632.4	4482.4	673226	98513.5	33661.3	4925.7	0.046	0.178	0	4.36e-05	0.000151	0.000957
204	29	trout	2,3',4,4',5-PCB (PCB 118)	0.5179	0.0257	0.0197	0.0018	0.2424	0.0522	0.0036	0.0008	0.0128	0.0024	427.48	16.35	311.9	11.93	0.0016	0.0001	0.0101	0.001	0	0.0033	ID	1.1419	0.1176	1.0628	0	0.0077	0.001	2.5064	1.0786		0.2849	0.0423	1.1145	0.1655	24440.9	4661.7	537162	102455	26858.1	5122.7	0.046	0.178	0	2.46e-05	6.57e-05	0.00054
205	29	trout	2,2',3,3',4,4'-PCB (PCB 128)	0.5112	0.0244	0.0136	0.0019	0.766	0.111	0.0115	0.0017	0.0108	0.0017	427.48	16.35	257.17	9.83	0.0009	0	0.0099	0.001	0	0.003	ID	1.1117	0.1084	1.0628	0	0.0048	0.0011	0	0.2128	ID	1.0681	0.1103	4.1785	0.4317	23905.2	3801.8	525387	83556.1	26269.4	4177.8	0.046	0.178	0	4.74e-05	0.000124	0.00104
206	29	trout	2,2',3,4,4',5'-PCB (PCB 138)	0.516	0.0253	0.0209	0.0018	0.0831	0.0125	0.0012	0.0002	0.0102	0.0017	427.48	16.35	294.2	11.25	0.0013	0	0.0101	0.001	0	0.0025	ID	1.1332	0.1149	1.0628	0	0.0092	0.0009	11.4389	2.4089		0.1222	0.0138	0.4782	0.0539	28845.2	4905.9	633958	107823	31697.9	5391.1	0.046	0.178	0	1.05e-05	2.78e-05	0.000231
207	29	trout	2,2',4,4',5,5'-PCB (PCB 153)	0.5143	0.025	0.0199	0.0017	0.1555	0.0288	0.0023	0.0004	0.0112	0.0021	427.48	16.35	279.45	10.69	0.0011	0	0.01	0.001	0	0.0029	ID	1.1253	0.1124	1.0628	0	0.0084	0.0009	5.0469	1.471		0.2084	0.0273	0.8155	0.1067	24968.2	4763.2	548750	104686	27437.5	5234.3	0.046	0.178	0	1.45e-05	3.82e-05	0.000319
208	29	trout	2,2',3,4',5,5',6-PCB (PCB 187)	0.5043	0.0231	0.0182	0.0017	0.2501	0.0346	0.0038	0.0005	0.0097	0.0015	427.48	16.35	217.2	8.31	0.0006	0	0.0096	0.0009	0	0.0024	ID	1.0814	0.1001	1.0628	0	0.0072	0.0007	2.1792	0.6686		0.3866	0.0418	1.5122	0.1637	22378.4	3643.6	491832	80079.4	24591.6	4004	0.046	0.178	0	2.52e-05	6.61e-05	0.000553
209	29	trout	2,3,3',4,4',5,5'-PCB (PCB 189)	0.4572	0.021	0.015	0.0016	0.437	0.065	0.0066	0.001	0.011	0.0017	427.48	16.35	100.97	3.86	0.0002	0	0.008	0.0007	0	0.0026	ID	0.8952	0.0758	1.0628	0	0.0045	0.0006	0.0908	0.3199		0.5973	0.0619	2.3366	0.2422	9200.9	1486.4	202218	32668.4	10110.9	1633.4	0.046	0.178	0	6.01e-05	0.000172	0.00132
210	29	trout	2,2',3,3',4,4',5,6-PCB (PCB 195)	0.4754	0.0206	0.0155	0.0016	0.4277	0.0552	0.0064	0.0008	0.0103	0.0015	427.48	16.35	129.02	4.93	0.0002	0	0.0086	0.0007	0	0.0024	ID	0.9633	0.0796	1.0628	0	0.0049	0.0006	0.2262	0.3095		0.6213	0.0583	2.4306	0.228	12494.8	1866.3	274611	41017.3	13730.5	2050.9	0.046	0.178	0	7.27e-05	0.0002	0.0016
211	29	trout	2,2',3,3',4,4',5,5',6-PCB (PCB 206)	0.5028	0.0229	0.0166	0.0017	0.4099	0.0594	0.0061	0.0009	0.0127	0.0017	427.48	16.35	210.04	8.03	0.0005	0	0.0095	0.0009	0	0.0027	ID	1.0749	0.0985	1.0628	0	0.0056	0.0008	0.4846	0.4053		0.4823	0.0458	1.8867	0.1792	16475.2	2252.9	362091	49513.5	18104.6	2475.7	0.046	0.178	0	5.23e-05	0.000137	0.00115
212	29	trout	2,2',3,3',4,4',5,5',6,6'-PCB (PCB 209)	0.3426	0.0347	0.0141	0.0016	0.2546	0.0352	0.0038	0.0005	0.0122	0.0013	427.48	16.35	35.49	1.36	0	0	0.0049	0.0008	0	0.0021	ID	0.5538	0.0853	1.0628	0	0.0037	0.0006	0.5587	0.3908		0.3124	0.0343	1.2221	0.134	2902.8	327.8	63798.1	7203.5	3189.9	360.2	0.046	0.178	0	0.000186	0.000712	0.00409
213	29	trout	Tris(4-chlorophenyl)methane (TCPMe)	0.4971	0.0221	0.0166	0.0016	0.381	0.0305	0.0057	0.0005	0.0103	0.001	427.48	16.35	186.32	7.12	0.0004	0	0.0093	0.0008	0	0.002	ID	1.0505	0.093	1.0628	0	0.0058	0.0006	0.6442	0.2675		0.5553	0.0369	2.1722	0.1444	18105.1	1862	397913	40922.4	19895.7	2046.1	0.046	0.178	0	6.36e-05	0.000169	0.0014
214	29	trout	Tris(4-chlorophenyl)methanol (TCPMeOH)	0.5232	0.0269	0.0215	0.0018	0.3376	0.0494	0.0051	0.0007	0.033	0.0031	427.46	16.34	374.37	14.31	0.0043	0.0002	0.0104	0.0011	0.0115	0.0039		1.1661	0.1259	1.0628	0	0.0069	0.0009	1.225	0.5621		0.1532	0.0138	0.5995	0.0538	11328	1141.8	248964	25095.1	12448.2	1254.8	0.046	0.178	0	4.23e-05	0.000183	0.00093
215	30	guppies	2,2',5,5'-PCB (PCB 52)	0.5244	0.0272	0.0389	0.0019	0.1932	0.0405	0.0069	0.0014	0.0067	0.0006	2210.14	130.25	2030.03	119.64	0.0246	0.0014	0.013	0.0014	0	0.0022	ID	1.0665	0.1164	0.9674	0	0.0105	0.0013	3.4856	1.2556		1.0239	0.1489	1.832	0.2664	301180	32268.4	4.59812e+06	492642	229906	24632.1	0.066	0.117	0	0.0017	0.00382	0.0259
216	30	guppies	2,2',5,5'-PCB (PCB 52)	0.5244	0.0272	0.0334	0.0017	0.1832	0.0293	0.0058	0.0009	0.0046	0.0003	1947.48	110.78	1788.77	101.75	0.0216	0.0012	0.0115	0.0012	0	0.0018	ID	1.0665	0.1164	0.9674	0	0.0094	0.0011	3.789	1.0662		1.2552	0.135	2.246	0.2416	390048	37056.4	5.95488e+06	565741	297744	28287.1	0.066	0.117	0	0.00133	0.00292	0.0203
217	30	guppies	3,3',5,5'-PCB (PCB 80)	0.5217	0.0266	0.0217	0.0021	0.4082	0.1453	0.0146	0.0052	0.0079	0.001	2210.23	130.26	1830.7	107.89	0.0102	0.0006	0.0129	0.0014	0	0.003	ID	1.0551	0.1124	0.9674	0	0.0076	0.002	0.5624	0.9342		1.8339	0.4764	3.2814	0.8525	230308	32941.6	3.51614e+06	502923	175807	25146.1	0.066	0.117	0	0.00466	0.0069	0.0711
218	30	guppies	2,2',3,3',6,6'-PCB (PCB 136)	0.5187	0.0259	0.0186	0.0012	0.044	0.013	0.0014	0.0004	0.0035	0.0007	1947.58	110.79	1454.64	82.75	0.0054	0.0003	0.0112	0.0012	0	0.0015	ID	1.0424	0.1081	0.9674	0	0.0107	0.0011	21.661	7.3895		0.3928	0.0719	0.7028	0.1287	412811	89718.6	6.30244e+06	1.36975e+06	315122	68487.3	0.066	0.117	0	0.000516	0.000621	0.00788
219	30	guppies	2,2',4,4',5,5'-PCB (PCB 153)	0.5143	0.025	0.0169	0.0011	0.2713	0.0348	0.0097	0.0012	0.0041	0.0003	2210.27	130.27	1444.9	85.16	0.0039	0.0002	0.0125	0.0012	0	0.0012	ID	1.0243	0.1023	0.9674	0	0.0091	0.001	1.7832	0.5572		2.3904	0.1792	4.2771	0.3207	356411	36528.8	5.44139e+06	557691	272069	27884.5	0.066	0.117	0	0.00353	0.00404	0.0539
220	30	guppies	2,2',3,3',4,4',5,5'-PCB (PCB 194)	0.49	0.0214	0.0128	0.0011	0.3173	0.0758	0.0113	0.0027	0.0043	0.0006	2210.28	130.27	844.2	49.76	0.0012	0.0001	0.0113	0.001	0	0.0016	ID	0.9296	0.0795	0.9674	0	0.0077	0.0011	1.0332	0.7207		2.6534	0.3712	4.7478	0.6641	197700	31801	3.01832e+06	485512	150916	24275.6	0.066	0.117	0	0.00714	0.00731	0.109
221	30	guppies	2,2',3,3',4,4',5,5',6,6'-PCB (PCB 209)	0.3426	0.0347	0.0088	0.0008	0.217	0.043	0.0078	0.0015	0.0034	0.0005	2210.29	130.27	183.48	10.81	0.0002	0	0.0062	0.0009	0	0.0011	ID	0.5041	0.0777	0.9674	0	0.0048	0.0008	0.8514	0.5389		2.2708	0.2461	4.0632	0.4403	53756.1	8863.3	820704	135318	41035.2	6765.9	0.066	0.117	0	0.00855	0.00999	0.13
222	30	guppies	2,2',3,3',4,4',5,5',6,6'-PCB (PCB 209)	0.3426	0.0347	0.0073	0.0008	0.1352	0.0244	0.0042	0.0008	0.0011	0.0004	1947.61	110.8	161.67	9.2	0.0001	0	0.0054	0.0008	0	0.0009	ID	0.5041	0.0777	0.9674	0	0.0047	0.0007	2.2567	0.8361		3.7148	0.7899	6.647	1.4133	141328	48306.4	2.15768e+06	737502	107884	36875.1	0.066	0.117	0	0.00547	0.00571	0.0835
223	31	carp	2,4,4'-Tribromodiphenyl ether (BDE 28)	0.5251	0.0274	0.0251	0.0015	0.31	0.0714	0.0103	0.0024	0.0178	0.005	336.51	12.63	319.18	11.98	0.0064	0.0002	0.0145	0.0016	0	0.0061	ID	0.9141	0.1005	0.8266	0	0.01	0.0015	1.2076	0.715		0.5807	0.0607	1.7147	0.1791	17935.4	5065.4	282443	79768.5	14122.1	3988.4	0.064	0.188	0	3.96e-05	7.94e-05	0.000623
224	31	carp	2,2',4,4'-Tetrabromodiphenyl ether (BDE 47)	0.5173	0.0256	-0.0009	0.0029	1.7428	0.1924	0.0581	0.0064	0.0219	0.0023	336.54	12.64	241.04	9.05	0.0008	0	0.014	0.0014	0.0228	0.005		0.8859	0.0908	0.8266	0	0.0068	0.0029	0	0.0682	ID	2.649	0.143	7.8217	0.4224	10991	1223.4	173087	19266.3	8654.3	963.3	0.064	0.188	0	7.67e-05	0.000249	0.00121
225	32	carp	4,4'-methylenebis-2,6-di-tert-butylphenol (Binox M)	0.1356	0.0316	0.0247	0.003	0.3527	0.0235	0.0106	0.0007	0.0476	0.0028	611.31	25.78	10.65	0.45	0	0	0.0024	0.0006	0.0229	0.0042		0.1285	0.0346	0.8189	0	0.0021	0.0004	0	0.068	ID	0.2225	0.0085	0.8582	0.0328	223.9	16.3	4514.1	328.5	225.7	16.4	0.05	0.191	0	0.00806	0.209	0.162
226	32	carp	hexachlorobenzene	0.5255	0.0275	0.0465	0.0035	0.8695	0.0866	0.0261	0.0026	0.0896	0.0043	611.21	25.77	588.37	24.81	0.0212	0.0009	0.0169	0.0019	0.0432	0.0064		0.9069	0.1	0.8189	0	0.008	0.0015	0	0.1049	ID	0.291	0.0191	1.1223	0.0736	6563.9	420.4	132332	8476.1	6616.6	423.8	0.05	0.191	0	0.016	0.127	0.322
227	32	carp	pentachlorobenzene	0.5261	0.0276	0.0983	0.008	0.7661	0.1616	0.023	0.0048	0.2085	0.0193	610.96	25.74	604.24	25.45	0.0772	0.0033	0.017	0.0019	0.1101	0.023		0.9091	0.1008	0.8189	0	0.0081	0.0028	0	0.2521	ID	0.1103	0.0152	0.4278	0.0588	2898.6	295.1	58788.7	5985.5	2939.4	299.3	0.049	0.191	0	0.00743	0.125	0.151
228	32	carp	hexachlorobenzene	0.5255	0.0275	0.0427	0.0072	0.7456	0.1199	0.0224	0.0036	0.0841	0.0089	611.21	25.77	588.37	24.81	0.0213	0.0009	0.017	0.0019	0.0414	0.0127		0.9069	0.1	0.8189	0	0.0081	0.0021	0	0.1986	ID	0.2659	0.0264	1.0318	0.1025	6994	800	141862	16226.1	7093.1	811.3	0.049	0.191	0	0.019	0.14	0.386
229	32	carp	2,4-dichloro-1-(4-nitrophenoxy) benzene	0.5262	0.0277	0.258	0.0112	0.5006	0.0761	0.015	0.0023	0.2644	0.0155	610.11	25.62	608.04	25.53	0.2217	0.0093	0.0145	0.0016	0.0063	0.0198		0.9097	0.101	0.8189	0	0.0072	0.0014	0.0886	0.2942		0.0568	0.006	0.1876	0.02	2300.1	166	39711.4	2865.9	1985.6	143.3	0.058	0.191	0	0.00591	0.122	0.102
230	32	carp	hexachlorobenzene	0.5255	0.0275	0.0502	0.0061	0.7866	0.0688	0.0236	0.0021	0.0843	0.0065	611.21	25.77	588.37	24.81	0.0181	0.0008	0.0144	0.0016	0.034	0.0096		0.9069	0.1	0.8189	0	0.0068	0.001	0	0.1044	ID	0.28	0.0123	0.9251	0.0408	6981.1	616.9	120569	10654	6028.4	532.7	0.058	0.191	0	0.0168	0.123	0.291
231	32	carp	1,4-bis(isopropylamino)anthraquinone	0.5245	0.0272	0.0435	0.0227	0.7056	0.2654	0.0212	0.008	0.2005	0.0329	611.26	25.78	564.43	23.8	0.0091	0.0004	0.0158	0.0017	0.157	0.0429		0.9033	0.0987	0.8189	0	0.0075	0.0042	0	0.4832	ID	0.1056	0.0254	0.3819	0.0919	2815.6	478.1	53224.3	9038.1	2661.2	451.9	0.053	0.191	0	0.00759	0.123	0.144
232	32	carp	hexachlorobenzene	0.5255	0.0275	0.0536	0.0224	0.7444	0.08	0.0223	0.0024	0.0691	0.0084	611.21	25.77	588.37	24.81	0.0198	0.0008	0.0158	0.0017	0.0155	0.0243		0.9069	0.1	0.8189	0	0.0075	0.0013	0	0.1353	ID	0.323	0.0189	1.1681	0.0684	8510	1094.4	160865	20688.3	8043.2	1034.4	0.053	0.191	0	0.0219	0.135	0.415
233	32	carp	N,N'-di-2-naphthyl-p-phenylenediamine	0.5245	0.0272	0.0505	0.0216	0.2015	0.0396	0.006	0.0012	0.2569	0.015	611.26	25.78	564.43	23.8	0.0091	0.0004	0.0158	0.0017	0.2064	0.0265		0.9033	0.0987	0.8189	0	0.0126	0.0015	2.7608	0.9642		0.0235	0.0037	0.0852	0.0134	2197	158.3	41609.4	2997.9	2080.5	149.9	0.053	0.191	0	0.00268	0.0533	0.0508
234	32	carp	hexachlorobenzene	0.5255	0.0275	0.0529	0.0215	0.7338	0.0505	0.022	0.0015	0.0625	0.0053	611.21	25.77	588.37	24.81	0.0198	0.0008	0.0158	0.0017	0.0096	0.0224		0.9069	0.1	0.8189	0	0.0075	0.0009	0	0.0925	ID	0.3522	0.0147	1.2762	0.0533	9413.9	898.8	178288	17021.3	8914.4	851.1	0.053	0.191	0	0.0247	0.139	0.467
235	32	carp	musk xylene	0.5263	0.0277	0.3029	0.012	0.6215	0.1047	0.0186	0.0031	0.1302	0.0115	609.46	25.53	608.1	25.47	0.2747	0.0115	0.0116	0.0013	0	0.0173	ID	0.9098	0.101	0.8189	0	0.0055	0.0013	0	0.2541	ID	0.1432	0.0154	0.3803	0.041	4669.5	455.8	64827.2	6327.9	3241.4	316.4	0.072	0.191	0	0.00234	0.0551	0.0325
236	32	carp	o-terphenyl	0.5258	0.0276	0.0538	0.0037	0.4306	0.1014	0.0129	0.003	0.3725	0.0289	611.15	25.76	596.66	25.15	0.0235	0.001	0.0116	0.0013	0.3187	0.0301		0.9081	0.1004	0.8189	0	0.0066	0.0014	0.382	0.5143		0.0347	0.0058	0.0921	0.0155	1601.8	141.6	22246	1966.1	1112.3	98.3	0.072	0.191	0	0.00157	0.0449	0.0218
237	32	carp	methoxychlor	0.5261	0.0277	0.0978	0.0044	0.1813	0.0061	0.0054	0.0002	0.3911	0.0031	610.87	25.72	605.37	25.49	0.0646	0.0027	0.0116	0.0013	0.2932	0.0054		0.9093	0.1009	0.8189	0	0.0095	0.0011	3.2878	0.4861		0.0139	0.0004	0.0369	0.0011	1548	66.3	21497.6	921.2	1074.9	46.1	0.072	0.191	0	0.00123	0.0366	0.017
238	32	carp	hexachlorobenzene	0.5255	0.0275	0.0431	0.0035	0.5848	0.0594	0.0175	0.0018	0.0541	0.0065	611.21	25.77	588.37	24.81	0.0145	0.0006	0.0115	0.0013	0.011	0.0078		0.9069	0.1	0.8189	0	0.0055	0.0009	0	0.1727	ID	0.3244	0.0226	0.8618	0.06	10878.6	1386.5	151088	19257	7554.4	962.9	0.072	0.191	0	0.00694	0.0321	0.0963
[truncated: 30 more columns]
